# Supplementary material for: Analysis of HER2 genomic binding in breast cancer cells identifies a global role in direct gene regulation
Source: PLoS One. 2019 Nov 20;14(11):e0225180. doi: 10.1371/journal.pone.0225180 (PMC6867699; doi:10.1371/journal.pone.0225180)
Supplement: S1 Table — Data from RIME experiments, from HER2 and IgG immunoprecipitations using nuclear and chromatin fractions from SKBR3 cell lines. In sample 602 & 603, EGF treated cells had been cultured in media containing heavy arginine and lysine, and vehicle treated cells had been cultured in media containing light arginine & lysine. In samples 628 & 629, the labels were reversed, i.e. the EGF treated cells had been cultured in media containing light arginine and lysine, and vehicle treated cells had been cultured in media containing heavy arginine & lysine. (XLSX) [file pone.0225180.s003.xlsx]

## Sheet: HER2_IP_nuclear_602
Accession	Description	Score	Coverage	# Proteins	# Unique Peptides	# Peptides	# PSMs	Area	Heavy/Light	Heavy/Light Count	Heavy/Light Variability [%]	# AAs	MW [kDa]	calc. pI
O43813	LanC-like protein 1 OS=Homo sapiens GN=LANCL1 PE=1 SV=1 - [LANC1_HUMAN]	6.57765	5.01	1	2	2	2	6.32564e+06	8.53048	2	9846.94	399	45.2536	7.75244
Q9NR31	GTP-binding protein SAR1a OS=Homo sapiens GN=SAR1A PE=1 SV=1 - [SAR1A_HUMAN]	4.30401	6.06	1	1	1	1	3.64224e+06	2.82413	1		198	22.3525	6.68311
P10398	Serine/threonine-protein kinase A-Raf OS=Homo sapiens GN=ARAF PE=1 SV=2 - [ARAF_HUMAN]	5.39979	4.95	3	2	2	2	844455	1.90546	2	6.27676	606	67.5423	9.01221
Q9Y2A7	Nck-associated protein 1 OS=Homo sapiens GN=NCKAP1 PE=1 SV=1 - [NCKP1_HUMAN]	3.23481	1.24	1	1	1	1	3.47578e+06	1.79005	1		1128	128.707	6.62451
Q9Y2X3	Nucleolar protein 58 OS=Homo sapiens GN=NOP58 PE=1 SV=1 - [NOP58_HUMAN]	2.72776	3.59	1	1	1	1	59015.4	1.76701	1		529	59.5405	8.92432
P27348	14-3-3 protein theta OS=Homo sapiens GN=YWHAQ PE=1 SV=1 - [1433T_HUMAN]	38.4386	24.08	3	2	5	11	5.68191e+06	1.70963	2	87.9247	245	27.7468	4.77979
P62851	40S ribosomal protein S25 OS=Homo sapiens GN=RPS25 PE=1 SV=1 - [RS25_HUMAN]	15.7401	15.2	1	2	2	5	9.92948e+06	1.6602	2	79.0375	125	13.7337	10.1108
P62993	Growth factor receptor-bound protein 2 OS=Homo sapiens GN=GRB2 PE=1 SV=1 - [GRB2_HUMAN]	37.7034	37.79	1	7	7	12	5.12346e+06	1.63617	5	27.687	217	25.1904	6.31592
O75643	U5 small nuclear ribonucleoprotein 200 kDa helicase OS=Homo sapiens GN=SNRNP200 PE=1 SV=2 - [U520_HUMAN]	2.18248	0.89	1	1	1	1	62874.5	1.63499	1		2136	244.353	6.06201
Q8TBA6	Golgin subfamily A member 5 OS=Homo sapiens GN=GOLGA5 PE=1 SV=3 - [GOGA5_HUMAN]	6.26154	4.92	1	2	2	2	1.06919e+06	1.6148	2	36.1851	731	82.9738	5.8335
Q5VZK9	Leucine-rich repeat-containing protein 16A OS=Homo sapiens GN=LRRC16A PE=1 SV=1 - [LR16A_HUMAN]	0	1.24	1	1	1	2	190859	1.48921	1		1371	151.462	7.85498
Q6P4Q7	Metal transporter CNNM4 OS=Homo sapiens GN=CNNM4 PE=1 SV=3 - [CNNM4_HUMAN]	4.12714	1.55	1	1	1	1	577905	1.48479	1		775	86.5519	6.07471
P29353	SHC-transforming protein 1 OS=Homo sapiens GN=SHC1 PE=1 SV=4 - [SHC1_HUMAN]	17.3335	17.5	2	5	5	6	2.13824e+06	1.47508	5	14.0871	583	62.7825	6.44287
P52789	Hexokinase-2 OS=Homo sapiens GN=HK2 PE=1 SV=2 - [HXK2_HUMAN]	6.53841	2.62	2	1	2	2	1.81415e+06	1.46066	1		917	102.313	6.04932
P27824	Calnexin OS=Homo sapiens GN=CANX PE=1 SV=2 - [CALX_HUMAN]	3.88998	2.53	1	1	1	1	1.52874e+06	1.45846	1		592	67.5259	4.60205
Q9C0C2	182 kDa tankyrase-1-binding protein OS=Homo sapiens GN=TNKS1BP1 PE=1 SV=4 - [TB182_HUMAN]	17.1799	3.59	1	3	3	4	1.74368e+06	1.44761	3	4.27498	1729	181.685	4.85596
Q15942	Zyxin OS=Homo sapiens GN=ZYX PE=1 SV=1 - [ZYX_HUMAN]	24.6358	10.49	1	3	3	7	4.80926e+06	1.42264	3	4.14266	572	61.2382	6.66846
Q9Y6W5	Wiskott-Aldrich syndrome protein family member 2 OS=Homo sapiens GN=WASF2 PE=1 SV=3 - [WASF2_HUMAN]	15.9521	7.63	1	2	2	4	1.61525e+06	1.38114	2	0.59179	498	54.2504	5.52881
Q96CW1	AP-2 complex subunit mu OS=Homo sapiens GN=AP2M1 PE=1 SV=2 - [AP2M1_HUMAN]	3.10128	5.29	1	1	1	1	1.23545e+06	1.3693	1		435	49.623	9.53955
Q7L576	Cytoplasmic FMR1-interacting protein 1 OS=Homo sapiens GN=CYFIP1 PE=1 SV=1 - [CYFP1_HUMAN]	27.2509	4.47	2	4	4	8	2.28178e+06	1.36825	4	7.33872	1253	145.089	6.90283
O15145	Actin-related protein 2/3 complex subunit 3 OS=Homo sapiens GN=ARPC3 PE=1 SV=3 - [ARPC3_HUMAN]	3.20771	6.18	1	1	1	1	1.23132e+06	1.34911	1		178	20.5334	8.5874
P11387	DNA topoisomerase 1 OS=Homo sapiens GN=TOP1 PE=1 SV=2 - [TOP1_HUMAN]	41.0004	11.37	2	8	8	14	8.17078e+06	1.34673	7	4.61921	765	90.6689	9.30518
Q05655	Protein kinase C delta type OS=Homo sapiens GN=PRKCD PE=1 SV=2 - [KPCD_HUMAN]	23.7354	8.58	1	5	5	7	3.36835e+06	1.34581	5	2.96739	676	77.4549	7.75244
Q15797	Mothers against decapentaplegic homolog 1 OS=Homo sapiens GN=SMAD1 PE=1 SV=1 - [SMAD1_HUMAN]	2.91089	3.01	2	1	1	1	1.02297e+06	1.34147	1		465	52.2265	7.31299
P40763	Signal transducer and activator of transcription 3 OS=Homo sapiens GN=STAT3 PE=1 SV=2 - [STAT3_HUMAN]	38.3886	10.52	1	6	6	11	3.05408e+06	1.33714	6	31.2759	770	88.0114	6.30322
P18754	Regulator of chromosome condensation OS=Homo sapiens GN=RCC1 PE=1 SV=1 - [RCC1_HUMAN]	5.4287	4.51	1	1	1	1	2.55529e+06	1.33077	1		421	44.9406	7.51807
Q9NZN4	EH domain-containing protein 2 OS=Homo sapiens GN=EHD2 PE=1 SV=2 - [EHD2_HUMAN]	3.44913	2.95	1	1	1	1	211616	1.31825	1		543	61.1227	6.45557
Q14498	RNA-binding protein 39 OS=Homo sapiens GN=RBM39 PE=1 SV=2 - [RBM39_HUMAN]	9.17334	5.28	1	2	2	2	1.8832e+06	1.31434	2	8.60093	530	59.3427	10.0962
Q8N3E9	1-phosphatidylinositol 4,5-bisphosphate phosphodiesterase delta-3 OS=Homo sapiens GN=PLCD3 PE=1 SV=3 - [PLCD3_HUMAN]	4.69199	2.92	1	1	1	1	594366	1.30857	1		789	89.2022	6.97607
O60346	PH domain leucine-rich repeat-containing protein phosphatase 1 OS=Homo sapiens GN=PHLPP1 PE=1 SV=3 - [PHLP1_HUMAN]	9.85785	1.69	1	1	1	3	215866	1.3008	1		1717	184.556	6.27783
Q05519	Serine/arginine-rich splicing factor 11 OS=Homo sapiens GN=SRSF11 PE=1 SV=1 - [SRS11_HUMAN]	13.1623	8.06	1	3	3	4	1.981e+06	1.30028	3	3.58424	484	53.5102	10.521
P09874	Poly [ADP-ribose] polymerase 1 OS=Homo sapiens GN=PARP1 PE=1 SV=4 - [PARP1_HUMAN]	12.5919	4.34	1	3	3	4	764854	1.29813	2	37.5429	1014	113.012	8.88037
Q8IY17	Neuropathy target esterase OS=Homo sapiens GN=PNPLA6 PE=1 SV=2 - [PLPL6_HUMAN]	3.40369	0.88	1	1	1	1	1.71222e+06	1.29802	1		1366	149.9	7.81104
Q14247	Src substrate cortactin OS=Homo sapiens GN=CTTN PE=1 SV=2 - [SRC8_HUMAN]	17.3259	15.45	1	4	4	4	2.17014e+06	1.29667	4	5.02433	550	61.5485	5.40186
Q9Y490	Talin-1 OS=Homo sapiens GN=TLN1 PE=1 SV=3 - [TLN1_HUMAN]	11.9933	3.42	2	5	5	5	963506	1.28403	4	17.0072	2541	269.599	6.07471
Q9H6S3	Epidermal growth factor receptor kinase substrate 8-like protein 2 OS=Homo sapiens GN=EPS8L2 PE=1 SV=2 - [ES8L2_HUMAN]	40.764	14.83	1	5	5	9	6.47644e+06	1.2828	5	7.81357	715	80.5701	6.84424
Q99729	Heterogeneous nuclear ribonucleoprotein A/B OS=Homo sapiens GN=HNRNPAB PE=1 SV=2 - [ROAA_HUMAN]	4.51219	3.92	1	1	1	3	2.48424e+06	1.28263	1		332	36.2024	8.20654
Q13136	Liprin-alpha-1 OS=Homo sapiens GN=PPFIA1 PE=1 SV=1 - [LIPA1_HUMAN]	9.10874	1.25	1	1	1	2	1.71388e+06	1.27828	1		1202	135.695	6.29053
Q9NWB6	Arginine and glutamate-rich protein 1 OS=Homo sapiens GN=ARGLU1 PE=1 SV=1 - [ARGL1_HUMAN]	5.69205	5.86	1	2	2	2	3.01971e+06	1.278	2	15.1734	273	33.1968	10.3452
Q9Y383	Putative RNA-binding protein Luc7-like 2 OS=Homo sapiens GN=LUC7L2 PE=1 SV=2 - [LC7L2_HUMAN]	8.96328	9.44	1	2	2	2	2.80245e+06	1.27465	2	7.44019	392	46.4856	10.0083
O14980	Exportin-1 OS=Homo sapiens GN=XPO1 PE=1 SV=1 - [XPO1_HUMAN]	2.72396	1.68	1	1	1	1	169626	1.26771	1		1071	123.306	6.06201
P54753	Ephrin type-B receptor 3 OS=Homo sapiens GN=EPHB3 PE=1 SV=2 - [EPHB3_HUMAN]	3.07765	2	1	1	1	1	1.33321e+06	1.26072	1		998	110.259	6.31592
Q8ND76	Cyclin-Y OS=Homo sapiens GN=CCNY PE=1 SV=2 - [CCNY_HUMAN]	2.96491	4.4	1	1	1	1	517762	1.25488	1		341	39.3119	7.1958
Q9Y4F1	FERM, RhoGEF and pleckstrin domain-containing protein 1 OS=Homo sapiens GN=FARP1 PE=1 SV=1 - [FARP1_HUMAN]	9.86281	3.16	1	2	2	4	222865	1.24864	1		1045	118.559	8.14795
O14617	AP-3 complex subunit delta-1 OS=Homo sapiens GN=AP3D1 PE=1 SV=1 - [AP3D1_HUMAN]	3.43876	1.91	1	1	1	1	303485	1.2441	1		1153	130.076	8.48486
P45880	Voltage-dependent anion-selective channel protein 2 OS=Homo sapiens GN=VDAC2 PE=1 SV=2 - [VDAC2_HUMAN]	6.63322	7.48	1	2	2	2	1.55888e+06	1.24022	2	4.22806	294	31.5465	7.56201
Q9Y6M5	Zinc transporter 1 OS=Homo sapiens GN=SLC30A1 PE=1 SV=3 - [ZNT1_HUMAN]	2.73551	5.13	1	1	1	1	1258017	1.23769	1		507	55.2641	6.48096
Q12959	Disks large homolog 1 OS=Homo sapiens GN=DLG1 PE=1 SV=2 - [DLG1_HUMAN]	8.34844	2.21	1	1	1	2	2.65396e+06	1.23634	1		904	100.393	5.75732
P06493	Cyclin-dependent kinase 1 OS=Homo sapiens GN=CDK1 PE=1 SV=3 - [CDK1_HUMAN]	7.02507	14.81	23	2	3	3	1.52915e+06	1.23547	2	27.9191	297	34.0739	8.39697
Q9NVD7	Alpha-parvin OS=Homo sapiens GN=PARVA PE=1 SV=1 - [PARVA_HUMAN]	5.09388	3.76	1	1	1	1	479070	1.23521	1		372	42.2174	5.94775
Q9UBM7	7-dehydrocholesterol reductase OS=Homo sapiens GN=DHCR7 PE=1 SV=1 - [DHCR7_HUMAN]	2.90863	1.68	1	1	1	1	928765	1.22837	1		475	54.4538	8.70459
P02786	Transferrin receptor protein 1 OS=Homo sapiens GN=TFRC PE=1 SV=2 - [TFR1_HUMAN]	326.442	45.53	2	29	29	86	3.33795e+07	1.22261	37	11.2656	760	84.8179	6.60986
P19013	Keratin, type II cytoskeletal 4 OS=Homo sapiens GN=KRT4 PE=1 SV=4 - [K2C4_HUMAN]	36.5307	10.49	3	2	6	11	1.29157e+07	1.22118	2	3.15216	534	57.2498	6.60986
P24534	Elongation factor 1-beta OS=Homo sapiens GN=EEF1B2 PE=1 SV=3 - [EF1B_HUMAN]	11.8962	5.78	1	1	1	3	2.79875e+06	1.21496	1		225	24.7483	4.66553
O43707	Alpha-actinin-4 OS=Homo sapiens GN=ACTN4 PE=1 SV=2 - [ACTN4_HUMAN]	26.7254	9.99	1	5	5	9	3.70891e+06	1.20669	4	16.0808	911	104.788	5.43994
Q14847	LIM and SH3 domain protein 1 OS=Homo sapiens GN=LASP1 PE=1 SV=2 - [LASP1_HUMAN]	3.92079	4.98	1	1	1	1	2.47711e+06	1.20446	1		261	29.6982	7.04932
P62753	40S ribosomal protein S6 OS=Homo sapiens GN=RPS6 PE=1 SV=1 - [RS6_HUMAN]	8.14702	7.63	1	2	2	3	5.71942e+06	1.20366	1		249	28.663	10.8433
Q15147	1-phosphatidylinositol 4,5-bisphosphate phosphodiesterase beta-4 OS=Homo sapiens GN=PLCB4 PE=1 SV=3 - [PLCB4_HUMAN]	11.0663	2.89	1	2	2	3	1.35795e+06	1.20146	2	12.8519	1175	134.378	6.90283
P52735	Guanine nucleotide exchange factor VAV2 OS=Homo sapiens GN=VAV2 PE=1 SV=2 - [VAV2_HUMAN]	17.6102	5.69	1	3	3	4	1.07934e+06	1.18935	3	3.80405	878	101.224	7.07861
Q66PJ3	ADP-ribosylation factor-like protein 6-interacting protein 4 OS=Homo sapiens GN=ARL6IP4 PE=1 SV=2 - [AR6P4_HUMAN]	33.3193	11.88	1	3	3	8	6.95031e+06	1.18934	3	5.95707	421	44.8882	10.9312
O43790	Keratin, type II cuticular Hb6 OS=Homo sapiens GN=KRT86 PE=1 SV=1 - [KRT86_HUMAN]	15.0092	3.91	5	2	2	5	3.33749e+06	1.18857	2	9.37645	486	53.4663	5.65576
Q02878	60S ribosomal protein L6 OS=Homo sapiens GN=RPL6 PE=1 SV=3 - [RL6_HUMAN]	24.6705	18.75	1	5	5	10	4.51142e+06	1.18791	6	9.19896	288	32.7076	10.5796
Q16630	Cleavage and polyadenylation specificity factor subunit 6 OS=Homo sapiens GN=CPSF6 PE=1 SV=2 - [CPSF6_HUMAN]	3.41672	4.54	1	1	1	2	261307	1.18442	1		551	59.1734	7.15186
P08651	Nuclear factor 1 C-type OS=Homo sapiens GN=NFIC PE=1 SV=2 - [NFIC_HUMAN]	3.95227	2.76	1	1	1	1	2.26982e+06	1.18374	1		508	55.64	8.38232
Q9P206	Uncharacterized protein KIAA1522 OS=Homo sapiens GN=KIAA1522 PE=1 SV=2 - [K1522_HUMAN]	2.35588	0.97	1	1	1	1	828398	1.1734	1		1035	107.03	9.72998
P10586	Receptor-type tyrosine-protein phosphatase F OS=Homo sapiens GN=PTPRF PE=1 SV=2 - [PTPRF_HUMAN]	66.0278	7.97	3	9	9	15	5.85364e+06	1.16724	9	5.72234	1907	212.744	6.30322
Q9BRA2	Thioredoxin domain-containing protein 17 OS=Homo sapiens GN=TXNDC17 PE=1 SV=1 - [TXD17_HUMAN]	5.7042	11.38	1	1	1	2	4.0352e+06	1.16651	1		123	13.9318	5.51611
P62805	Histone H4 OS=Homo sapiens GN=HIST1H4A PE=1 SV=2 - [H4_HUMAN]	43.6377	41.75	1	4	4	16	2.55194e+07	1.1659	5	8.27188	103	11.3604	11.356
P23526	Adenosylhomocysteinase OS=Homo sapiens GN=AHCY PE=1 SV=4 - [SAHH_HUMAN]	19.2386	11.11	1	4	4	6	2.91389e+06	1.1656	3	6.08816	432	47.6852	6.34131
O60716	Catenin delta-1 OS=Homo sapiens GN=CTNND1 PE=1 SV=1 - [CTND1_HUMAN]	39.3167	10.64	1	7	7	12	3.98357e+06	1.16365	5	3.0914	968	108.103	6.22705
Q8WUF5	RelA-associated inhibitor OS=Homo sapiens GN=PPP1R13L PE=1 SV=4 - [IASPP_HUMAN]	4.07705	1.57	1	1	1	1	869999	1.16199	1		828	89.0357	6.81494
Q13418	Integrin-linked protein kinase OS=Homo sapiens GN=ILK PE=1 SV=2 - [ILK_HUMAN]	12.6119	7.74	1	3	3	4	1.05976e+06	1.16094	3	29.4481	452	51.3859	8.07471
P08133	Annexin A6 OS=Homo sapiens GN=ANXA6 PE=1 SV=3 - [ANXA6_HUMAN]	4.9621	6.98	1	2	2	2	1.14685e+06	1.1581	1		673	75.8256	5.60498
P11234	Ras-related protein Ral-B OS=Homo sapiens GN=RALB PE=1 SV=1 - [RALB_HUMAN]	34.0615	18.93	1	1	3	9	5.29861e+06	1.15446	2	3.77072	206	23.3939	6.62451
P62330	ADP-ribosylation factor 6 OS=Homo sapiens GN=ARF6 PE=1 SV=2 - [ARF6_HUMAN]	30.5467	26.86	1	3	3	8	1.07895e+07	1.15401	3	0.602575	175	20.0694	8.95361
Q9HCM4	Band 4.1-like protein 5 OS=Homo sapiens GN=EPB41L5 PE=1 SV=3 - [E41L5_HUMAN]	30.5226	11.73	1	4	5	9	3.46801e+06	1.15208	2	13.538	733	81.8049	6.58057
P04908	Histone H2A type 1-B/E OS=Homo sapiens GN=HIST1H2AB PE=1 SV=2 - [H2A1B_HUMAN]	64.426	35.38	3	1	5	18	5.71979e+07	1.15064	2	25.0988	130	14.127	11.0483
P00568	Adenylate kinase isoenzyme 1 OS=Homo sapiens GN=AK1 PE=1 SV=3 - [KAD1_HUMAN]	17.4086	13.92	1	2	2	5	1.05669e+06	1.15051	2	8.09438	194	21.6213	8.63135
O75131	Copine-3 OS=Homo sapiens GN=CPNE3 PE=1 SV=1 - [CPNE3_HUMAN]	61.0851	13.59	8	7	7	19	1.20347e+07	1.14386	9	9.59212	537	60.0921	5.84619
P60866	40S ribosomal protein S20 OS=Homo sapiens GN=RPS20 PE=1 SV=1 - [RS20_HUMAN]	5.10954	22.69	1	2	2	2	4.33225e+06	1.14347	2	12.4205	119	13.3643	9.93506
Q9UJU6	Drebrin-like protein OS=Homo sapiens GN=DBNL PE=1 SV=1 - [DBNL_HUMAN]	9.74628	3.72	1	1	1	2	3.02995e+06	1.14088	1		430	48.1776	5.04639
P53999	Activated RNA polymerase II transcriptional coactivator p15 OS=Homo sapiens GN=SUB1 PE=1 SV=3 - [TCP4_HUMAN]	14.1678	37.8	1	4	4	4	5.27046e+06	1.1386	4	21.9085	127	14.3864	9.59814
Q01105	Protein SET OS=Homo sapiens GN=SET PE=1 SV=3 - [SET_HUMAN]	3.0439	4.48	2	1	1	1	1.70664e+06	1.13834	1		290	33.4687	4.32275
Q02790	Peptidyl-prolyl cis-trans isomerase FKBP4 OS=Homo sapiens GN=FKBP4 PE=1 SV=3 - [FKBP4_HUMAN]	23.7763	10.02	1	4	4	7	4.87698e+06	1.13803	3	3.07721	459	51.7721	5.42725
P42677	40S ribosomal protein S27 OS=Homo sapiens GN=RPS27 PE=1 SV=3 - [RS27_HUMAN]	27.9145	29.76	2	3	3	8	3.81248e+06	1.13668	3	19.2358	84	9.45484	9.45166
Q9UHR4	Brain-specific angiogenesis inhibitor 1-associated protein 2-like protein 1 OS=Homo sapiens GN=BAIAP2L1 PE=1 SV=2 - [BI2L1_HUMAN]	12.2159	5.09	1	2	2	3	2.20219e+06	1.13446	2	22.0855	511	56.8471	8.67529
P59998	Actin-related protein 2/3 complex subunit 4 OS=Homo sapiens GN=ARPC4 PE=1 SV=3 - [ARPC4_HUMAN]	3.10156	6.55	1	1	1	1	2.09079e+06	1.13302	1		168	19.6543	8.42627
P31949	Protein S100-A11 OS=Homo sapiens GN=S100A11 PE=1 SV=2 - [S10AB_HUMAN]	23.194	23.81	1	2	2	5	3.97043e+06	1.1282	3	6.81385	105	11.7328	7.12256
O60814	Histone H2B type 1-K OS=Homo sapiens GN=HIST1H2BK PE=1 SV=3 - [H2B1K_HUMAN]	83.2785	32.54	10	2	5	20	1.00938e+08	1.12567	3	3.7435	126	13.8816	10.3159
P55060	Exportin-2 OS=Homo sapiens GN=CSE1L PE=1 SV=3 - [XPO2_HUMAN]	13.9799	3.91	1	2	2	4	1.84604e+06	1.12332	2	9.0233	971	110.346	5.77002
P40227	T-complex protein 1 subunit zeta OS=Homo sapiens GN=CCT6A PE=1 SV=3 - [TCPZ_HUMAN]	22.1757	12.62	1	4	4	7	377933	1.12291	3	13.6773	531	57.9876	6.68311
Q15366	Poly(rC)-binding protein 2 OS=Homo sapiens GN=PCBP2 PE=1 SV=1 - [PCBP2_HUMAN]	27.3438	14.25	3	2	4	7	5.01255e+06	1.12287	2	1.77683	365	38.5556	6.78564
P39019	40S ribosomal protein S19 OS=Homo sapiens GN=RPS19 PE=1 SV=2 - [RS19_HUMAN]	12.5133	13.1	1	3	3	4	2.93928e+06	1.11998	3	1.81858	145	16.0505	10.3159
O15144	Actin-related protein 2/3 complex subunit 2 OS=Homo sapiens GN=ARPC2 PE=1 SV=1 - [ARPC2_HUMAN]	11.1781	11.33	1	2	2	4	2.34737e+06	1.1198	2	13.2691	300	34.3115	7.35693
Q7KZI7	Serine/threonine-protein kinase MARK2 OS=Homo sapiens GN=MARK2 PE=1 SV=2 - [MARK2_HUMAN]	51.505	15.23	3	8	8	17	6.00711e+06	1.11829	9	7.75826	788	87.8559	9.71533
P46776	60S ribosomal protein L27a OS=Homo sapiens GN=RPL27A PE=1 SV=2 - [RL27A_HUMAN]	25.9189	17.57	1	3	3	9	1.02683e+07	1.11771	3	2.79327	148	16.551	11.0044
Q7Z2W4	Zinc finger CCCH-type antiviral protein 1 OS=Homo sapiens GN=ZC3HAV1 PE=1 SV=3 - [ZCCHV_HUMAN]	49.1962	9.42	1	6	6	11	3.32984e+06	1.112	6	6.9504	902	101.367	8.39697
Q8TE68	Epidermal growth factor receptor kinase substrate 8-like protein 1 OS=Homo sapiens GN=EPS8L1 PE=1 SV=3 - [ES8L1_HUMAN]	0	2.49	1	1	1	1	155496	1.11091	1		723	80.202	6.03662
Q92882	Osteoclast-stimulating factor 1 OS=Homo sapiens GN=OSTF1 PE=1 SV=2 - [OSTF1_HUMAN]	8.77343	5.61	1	1	1	2	267633	1.11007	1		214	23.7719	5.68115
P21291	Cysteine and glycine-rich protein 1 OS=Homo sapiens GN=CSRP1 PE=1 SV=3 - [CSRP1_HUMAN]	21.4248	27.98	1	3	3	6	2.31707e+07	1.10923	3	0.83577	193	20.5538	8.57275
P50914	60S ribosomal protein L14 OS=Homo sapiens GN=RPL14 PE=1 SV=4 - [RL14_HUMAN]	6.94693	11.16	1	2	2	2	5.40983e+06	1.10901	2	7.23858	215	23.417	10.9312
Q9UQB8	Brain-specific angiogenesis inhibitor 1-associated protein 2 OS=Homo sapiens GN=BAIAP2 PE=1 SV=1 - [BAIP2_HUMAN]	13.7143	7.97	1	3	3	4	2.70796e+06	1.10679	3	12.7552	552	60.8296	8.89502
Q99829	Copine-1 OS=Homo sapiens GN=CPNE1 PE=1 SV=1 - [CPNE1_HUMAN]	14.9284	3.72	1	1	1	4	563093	1.10332	1		537	59.0215	5.8335
P62241	40S ribosomal protein S8 OS=Homo sapiens GN=RPS8 PE=1 SV=2 - [RS8_HUMAN]	34.0395	31.25	1	6	6	11	1.27041e+07	1.10222	6	3.31187	208	24.1902	10.3159
Q92738	USP6 N-terminal-like protein OS=Homo sapiens GN=USP6NL PE=1 SV=3 - [US6NL_HUMAN]	15.5735	2.66	1	2	2	4	786178	1.10079	2	20.0975	828	94.0456	9.0708
P84103	Serine/arginine-rich splicing factor 3 OS=Homo sapiens GN=SRSF3 PE=1 SV=1 - [SRSF3_HUMAN]	2.25299	10.37	1	1	1	1	3.65424e+06	1.09951	1		164	19.3179	11.6489
Q9H4A6	Golgi phosphoprotein 3 OS=Homo sapiens GN=GOLPH3 PE=1 SV=1 - [GOLP3_HUMAN]	8.65103	5.37	1	1	1	3	98352	1.09799	1		298	33.7895	6.44287
Q9NX57	Ras-related protein Rab-20 OS=Homo sapiens GN=RAB20 PE=1 SV=1 - [RAB20_HUMAN]	0	7.69	1	1	1	1	1.09028e+06	1.09786	1		234	26.2602	6.55127
Q9Y3A5	Ribosome maturation protein SBDS OS=Homo sapiens GN=SBDS PE=1 SV=4 - [SBDS_HUMAN]	4.39066	6.4	1	2	2	2	1.39571e+06	1.0978	2	20.0206	250	28.7453	8.74854
P11142	Heat shock cognate 71 kDa protein OS=Homo sapiens GN=HSPA8 PE=1 SV=1 - [HSP7C_HUMAN]	321.94	35.45	2	21	23	84	4.78976e+07	1.09323	34	6.42993	646	70.8542	5.51611
P13489	Ribonuclease inhibitor OS=Homo sapiens GN=RNH1 PE=1 SV=2 - [RINI_HUMAN]	17.9683	8.89	1	3	3	4	2.39246e+06	1.09291	3	0.45579	461	49.9411	4.81787
P30050	60S ribosomal protein L12 OS=Homo sapiens GN=RPL12 PE=1 SV=1 - [RL12_HUMAN]	16.4245	9.09	1	1	1	3	6.19404e+06	1.09171	1		165	17.8075	9.42236
Q6P9B6	TLD domain-containing protein 1 OS=Homo sapiens GN=TLDC1 PE=1 SV=2 - [TLDC1_HUMAN]	5.86389	7.02	1	2	2	3	2.34144e+06	1.09109	1		456	50.9611	6.23975
P35221	Catenin alpha-1 OS=Homo sapiens GN=CTNNA1 PE=1 SV=1 - [CTNA1_HUMAN]	13.8942	2.87	1	1	1	3	695198	1.09106	1		906	100.009	6.29053
O00567	Nucleolar protein 56 OS=Homo sapiens GN=NOP56 PE=1 SV=4 - [NOP56_HUMAN]	3.27307	2.19	1	1	1	1	810798	1.09071	1		594	66.0087	9.18799
P46781	40S ribosomal protein S9 OS=Homo sapiens GN=RPS9 PE=1 SV=3 - [RS9_HUMAN]	24.8322	22.16	1	5	5	9	6.96514e+06	1.09017	4	9.5012	194	22.5776	10.6528
P04626	Receptor tyrosine-protein kinase erbB-2 OS=Homo sapiens GN=ERBB2 PE=1 SV=1 - [ERBB2_HUMAN]	1198.12	30.76	6	32	33	301	1.1888e+09	1.08994	78	11.6938	1255	137.821	5.90967
Q96HC4	PDZ and LIM domain protein 5 OS=Homo sapiens GN=PDLIM5 PE=1 SV=5 - [PDLI5_HUMAN]	18.9331	14.09	1	5	5	6	2.44651e+06	1.0893	5	8.2773	596	63.9045	8.20654
P67809	Nuclease-sensitive element-binding protein 1 OS=Homo sapiens GN=YBX1 PE=1 SV=3 - [YBOX1_HUMAN]	44.0112	36.42	1	4	4	12	3.80817e+06	1.08906	4	6.77234	324	35.9027	9.87646
Q92888	Rho guanine nucleotide exchange factor 1 OS=Homo sapiens GN=ARHGEF1 PE=1 SV=2 - [ARHG1_HUMAN]	3.14324	2.19	1	1	1	1	89787.1	1.08893	1		912	102.371	5.65576
P78371	T-complex protein 1 subunit beta OS=Homo sapiens GN=CCT2 PE=1 SV=4 - [TCPB_HUMAN]	8.51885	4.11	1	1	1	2	515141	1.08869	1		535	57.4521	6.45557
P35268	60S ribosomal protein L22 OS=Homo sapiens GN=RPL22 PE=1 SV=2 - [RL22_HUMAN]	41.2387	40.63	1	5	5	13	1.76455e+07	1.08798	4	14.9876	128	14.7778	9.18799
P05783	Keratin, type I cytoskeletal 18 OS=Homo sapiens GN=KRT18 PE=1 SV=2 - [K1C18_HUMAN]	243.804	46.51	7	15	17	57	3.52428e+07	1.0861	22	7.32437	430	48.0285	5.45264
P25398	40S ribosomal protein S12 OS=Homo sapiens GN=RPS12 PE=1 SV=3 - [RS12_HUMAN]	7.28438	13.64	1	2	2	3	2.1141e+06	1.0859	2	4.55793	132	14.5055	7.21045
P62081	40S ribosomal protein S7 OS=Homo sapiens GN=RPS7 PE=1 SV=1 - [RS7_HUMAN]	27.946	27.84	1	5	5	8	5.05986e+06	1.08587	4	16.8688	194	22.1133	10.0962
P61313	60S ribosomal protein L15 OS=Homo sapiens GN=RPL15 PE=1 SV=2 - [RL15_HUMAN]	59.3894	38.73	1	7	7	21	1.57056e+07	1.08537	8	4.40404	204	24.1311	11.6196
P05787	Keratin, type II cytoskeletal 8 OS=Homo sapiens GN=KRT8 PE=1 SV=7 - [K2C8_HUMAN]	295.567	44.72	8	21	25	82	9.07586e+07	1.08471	26	4.29628	483	53.6711	5.59229
P17987	T-complex protein 1 subunit alpha OS=Homo sapiens GN=TCP1 PE=1 SV=1 - [TCPA_HUMAN]	3.0419	1.8	1	1	1	1	959434	1.08407	1		556	60.3056	6.11279
P62913	60S ribosomal protein L11 OS=Homo sapiens GN=RPL11 PE=1 SV=2 - [RL11_HUMAN]	9.83731	7.87	1	1	1	2	8.36475e+06	1.08318	1		178	20.2396	9.59814
Q9H4G0	Band 4.1-like protein 1 OS=Homo sapiens GN=EPB41L1 PE=1 SV=2 - [E41L1_HUMAN]	105.868	22.47	1	15	15	32	1.97053e+07	1.08257	15	5.79429	881	98.4422	5.61768
Q09666	Neuroblast differentiation-associated protein AHNAK OS=Homo sapiens GN=AHNAK PE=1 SV=2 - [AHNK_HUMAN]	709.359	45.03	1	111	116	246	3.23203e+07	1.08255	113	12.388	5890	628.699	6.15088
Q96S99	Pleckstrin homology domain-containing family F member 1 OS=Homo sapiens GN=PLEKHF1 PE=1 SV=3 - [PKHF1_HUMAN]	10.2094	11.47	2	2	2	3	4.08334e+06	1.08081	2	6.74131	279	31.1747	8.23584
P42766	60S ribosomal protein L35 OS=Homo sapiens GN=RPL35 PE=1 SV=2 - [RL35_HUMAN]	25.9182	21.95	1	3	3	8	2.63114e+06	1.08008	3	21.161	123	14.5426	11.0483
P67936	Tropomyosin alpha-4 chain OS=Homo sapiens GN=TPM4 PE=1 SV=3 - [TPM4_HUMAN]	19.2426	16.94	3	1	4	8	9.99783e+06	1.07922	1		248	28.5045	4.69092
P11021	78 kDa glucose-regulated protein OS=Homo sapiens GN=HSPA5 PE=1 SV=2 - [GRP78_HUMAN]	50.9327	15.44	1	6	7	14	6.71885e+06	1.07916	5	19.4468	654	72.2884	5.16064
Q14103	Heterogeneous nuclear ribonucleoprotein D0 OS=Homo sapiens GN=HNRNPD PE=1 SV=1 - [HNRPD_HUMAN]	12.1645	7.61	1	2	2	3	3.50375e+06	1.07869	2	8.76346	355	38.4103	7.81104
P31751	RAC-beta serine/threonine-protein kinase OS=Homo sapiens GN=AKT2 PE=1 SV=2 - [AKT2_HUMAN]	6.20667	3.33	1	1	1	2	1.10792e+06	1.07827	1		481	55.7331	6.3667
P62841	40S ribosomal protein S15 OS=Homo sapiens GN=RPS15 PE=1 SV=2 - [RS15_HUMAN]	26.3581	28.28	1	2	2	7	1.39699e+06	1.07706	3	4.58939	145	17.0292	10.3892
Q13185	Chromobox protein homolog 3 OS=Homo sapiens GN=CBX3 PE=1 SV=4 - [CBX3_HUMAN]	21.26	14.75	1	2	2	5	3.4832e+06	1.07633	3	3.36504	183	20.7984	5.32568
P62136	Serine/threonine-protein phosphatase PP1-alpha catalytic subunit OS=Homo sapiens GN=PPP1CA PE=1 SV=1 - [PP1A_HUMAN]	16.8606	13.33	2	2	4	5	3.91771e+06	1.07603	1		330	37.4878	6.32861
P62854	40S ribosomal protein S26 OS=Homo sapiens GN=RPS26 PE=1 SV=3 - [RS26_HUMAN]	8.05666	7.83	2	1	1	3	1.01285e+07	1.07538	1		115	13.0071	11.0044
P62701	40S ribosomal protein S4, X isoform OS=Homo sapiens GN=RPS4X PE=1 SV=2 - [RS4X_HUMAN]	15.2008	7.98	3	2	2	4	4.04453e+06	1.07506	2	11.4886	263	29.5791	10.1548
P53396	ATP-citrate synthase OS=Homo sapiens GN=ACLY PE=1 SV=3 - [ACLY_HUMAN]	13.2854	5.54	1	4	4	4	3.18165e+06	1.07382	4	7.763	1101	120.762	7.32764
Q13268	Dehydrogenase/reductase SDR family member 2, mitochondrial OS=Homo sapiens GN=DHRS2 PE=1 SV=4 - [DHRS2_HUMAN]	29.1989	18.57	1	4	4	9	6.8741e+06	1.07371	5	1.13792	280	29.9077	9.01221
P52943	Cysteine-rich protein 2 OS=Homo sapiens GN=CRIP2 PE=1 SV=1 - [CRIP2_HUMAN]	41.0594	24.52	1	2	2	8	1.95078e+07	1.07272	3	3.50066	208	22.478	8.71924
Q9H329	Band 4.1-like protein 4B OS=Homo sapiens GN=EPB41L4B PE=2 SV=2 - [E41LB_HUMAN]	12.6162	4.67	1	2	3	4	1.64924e+06	1.07269	2	1.05043	900	99.65	9.0415
Q07020	60S ribosomal protein L18 OS=Homo sapiens GN=RPL18 PE=1 SV=2 - [RL18_HUMAN]	13.5365	13.83	1	2	2	3	8.33029e+06	1.07248	2	8.20214	188	21.6211	11.7222
P21964	Catechol O-methyltransferase OS=Homo sapiens GN=COMT PE=1 SV=2 - [COMT_HUMAN]	6.09277	7.38	1	2	2	2	2.65495e+06	1.06938	1		271	30.0176	5.46533
P12956	X-ray repair cross-complementing protein 6 OS=Homo sapiens GN=XRCC6 PE=1 SV=2 - [XRCC6_HUMAN]	7.14154	5.91	1	2	2	2	1.17002e+06	1.06883	2	7.62095	609	69.7991	6.63916
P49327	Fatty acid synthase OS=Homo sapiens GN=FASN PE=1 SV=3 - [FAS_HUMAN]	977.931	42.17	2	77	77	269	5.31338e+07	1.06852	102	7.53118	2511	273.254	6.44287
Q6P996	Pyridoxal-dependent decarboxylase domain-containing protein 1 OS=Homo sapiens GN=PDXDC1 PE=1 SV=2 - [PDXD1_HUMAN]	3.05917	4.44	1	1	1	2	1.07661e+06	1.06708	1		788	86.6523	5.37646
P08727	Keratin, type I cytoskeletal 19 OS=Homo sapiens GN=KRT19 PE=1 SV=4 - [K1C19_HUMAN]	395.486	54.75	11	19	24	108	9.02013e+07	1.06561	37	8.13137	400	44.0791	5.13525
P61353	60S ribosomal protein L27 OS=Homo sapiens GN=RPL27 PE=1 SV=2 - [RL27_HUMAN]	31.3243	41.91	1	5	5	11	1.68369e+07	1.06533	6	2.6156	136	15.7877	10.5649
P62906	60S ribosomal protein L10a OS=Homo sapiens GN=RPL10A PE=1 SV=2 - [RL10A_HUMAN]	17.6834	15.67	1	3	3	6	2.82228e+06	1.06488	4	6.18246	217	24.8155	9.93506
O95372	Acyl-protein thioesterase 2 OS=Homo sapiens GN=LYPLA2 PE=1 SV=1 - [LYPA2_HUMAN]	9.94715	14.29	1	2	2	3	2.07505e+06	1.06418	2	0.253567	231	24.7207	7.2251
P25705	ATP synthase subunit alpha, mitochondrial OS=Homo sapiens GN=ATP5A1 PE=1 SV=1 - [ATPA_HUMAN]	27.0875	10.67	1	4	4	7	2.93556e+06	1.06407	3	12.6516	553	59.7136	9.12939
Q96HS1	Serine/threonine-protein phosphatase PGAM5, mitochondrial OS=Homo sapiens GN=PGAM5 PE=1 SV=2 - [PGAM5_HUMAN]	3.46345	3.46	1	1	1	1	1.58985e+06	1.06253	1		289	31.9846	8.67529
P18206	Vinculin OS=Homo sapiens GN=VCL PE=1 SV=4 - [VINC_HUMAN]	11.0258	5.29	1	3	3	6	998372	1.05975	3	6.22499	1134	123.722	5.65576
O75369	Filamin-B OS=Homo sapiens GN=FLNB PE=1 SV=2 - [FLNB_HUMAN]	63.8429	6.07	2	8	9	16	4.12148e+06	1.05903	7	22.0655	2602	277.99	5.73193
Q12974	Protein tyrosine phosphatase type IVA 2 OS=Homo sapiens GN=PTP4A2 PE=1 SV=1 - [TP4A2_HUMAN]	5.97268	25.75	1	1	2	2	2.08504e+06	1.05821	1		167	19.1148	8.36768
P51178	1-phosphatidylinositol 4,5-bisphosphate phosphodiesterase delta-1 OS=Homo sapiens GN=PLCD1 PE=1 SV=2 - [PLCD1_HUMAN]	27.0968	6.88	1	4	4	8	3.20217e+06	1.057	4	26.0259	756	85.611	6.69775
P62277	40S ribosomal protein S13 OS=Homo sapiens GN=RPS13 PE=1 SV=2 - [RS13_HUMAN]	11.1274	23.18	1	3	3	5	3.04678e+06	1.05552	3	2.24186	151	17.2117	10.5356
Q96KK5	Histone H2A type 1-H OS=Homo sapiens GN=HIST1H2AH PE=1 SV=3 - [H2A1H_HUMAN]	71.7682	35.94	7	1	5	20	5.71979e+07	1.05544	2	4.42246	128	13.8978	10.8872
P06899	Histone H2B type 1-J OS=Homo sapiens GN=HIST1H2BJ PE=1 SV=3 - [H2B1J_HUMAN]	73.2315	32.54	8	2	5	17	9.12461e+07	1.0547	1		126	13.8956	10.3159
O14983	Sarcoplasmic/endoplasmic reticulum calcium ATPase 1 OS=Homo sapiens GN=ATP2A1 PE=1 SV=1 - [AT2A1_HUMAN]	3.8126	1.6	3	1	1	1	1.61874e+06	1.05443	1		1001	110.182	5.16064
Q7L7X3	Serine/threonine-protein kinase TAO1 OS=Homo sapiens GN=TAOK1 PE=1 SV=1 - [TAOK1_HUMAN]	14.1564	3.8	3	3	3	4	2.43355e+06	1.05385	2	11.2633	1001	115.997	7.6499
P46778	60S ribosomal protein L21 OS=Homo sapiens GN=RPL21 PE=1 SV=2 - [RL21_HUMAN]	17.8866	9.38	1	1	1	4	1.65198e+07	1.05156	2	2.80677	160	18.5531	10.4917
P49207	60S ribosomal protein L34 OS=Homo sapiens GN=RPL34 PE=1 SV=3 - [RL34_HUMAN]	4.82755	12.82	1	2	2	2	7.70812e+06	1.05047	2	5.48232	117	13.2845	11.4731
Q92499	ATP-dependent RNA helicase DDX1 OS=Homo sapiens GN=DDX1 PE=1 SV=2 - [DDX1_HUMAN]	10.3549	2.84	1	1	1	2	693135	1.05005	1		740	82.3798	7.2251
Q8NAX2	Keratinocyte differentiation factor 1 OS=Homo sapiens GN=KDF1 PE=2 SV=2 - [KDF1_HUMAN]	3.5842	3.27	1	1	1	1	1.32523e+06	1.0498	1		398	43.6141	6.53662
P62917	60S ribosomal protein L8 OS=Homo sapiens GN=RPL8 PE=1 SV=2 - [RL8_HUMAN]	24.1741	13.62	1	4	4	8	6.44431e+06	1.04906	3	10.2413	257	28.0073	11.0337
P63104	14-3-3 protein zeta/delta OS=Homo sapiens GN=YWHAZ PE=1 SV=1 - [1433Z_HUMAN]	39.2742	32.65	1	4	6	12	7.48809e+06	1.04882	4	4.3838	245	27.7277	4.79248
P61981	14-3-3 protein gamma OS=Homo sapiens GN=YWHAG PE=1 SV=2 - [1433G_HUMAN]	49.5741	27.13	3	2	6	15	8.12459e+06	1.04844	2	16.6458	247	28.2849	4.89404
Q14160	Protein scribble homolog OS=Homo sapiens GN=SCRIB PE=1 SV=4 - [SCRIB_HUMAN]	47.4702	8.04	2	9	9	15	4.47666e+06	1.04518	8	18.6822	1630	174.778	5.07178
P25815	Protein S100-P OS=Homo sapiens GN=S100P PE=1 SV=2 - [S100P_HUMAN]	13.6519	35.79	1	3	3	4	2.49958e+06	1.04468	3	0.180422	95	10.3932	4.88135
P31946	14-3-3 protein beta/alpha OS=Homo sapiens GN=YWHAB PE=1 SV=3 - [1433B_HUMAN]	74.6543	43.09	3	4	8	20	8.95916e+06	1.04433	4	5.65994	246	28.0648	4.83057
P49368	T-complex protein 1 subunit gamma OS=Homo sapiens GN=CCT3 PE=1 SV=4 - [TCPG_HUMAN]	3.85201	2.02	1	1	1	1	2.32073e+06	1.04304	1		545	60.4953	6.49365
P02545	Prelamin-A/C OS=Homo sapiens GN=LMNA PE=1 SV=1 - [LMNA_HUMAN]	55.0252	17.92	1	9	9	15	5.94429e+06	1.04264	8	9.80574	664	74.0947	7.02002
P39023	60S ribosomal protein L3 OS=Homo sapiens GN=RPL3 PE=1 SV=2 - [RL3_HUMAN]	10.7619	11.66	1	3	3	3	4.42491e+06	1.04255	3	6.28593	403	46.0798	10.1841
P05198	Eukaryotic translation initiation factor 2 subunit 1 OS=Homo sapiens GN=EIF2S1 PE=1 SV=3 - [IF2A_HUMAN]	2.81393	3.17	1	1	1	1	1.08261e+06	1.04254	1		315	36.0894	5.08447
Q13263	Transcription intermediary factor 1-beta OS=Homo sapiens GN=TRIM28 PE=1 SV=5 - [TIF1B_HUMAN]	5.29439	2.4	1	1	1	1	1.71774e+06	1.04252	1		835	88.4934	5.77002
Q8N5I2	Arrestin domain-containing protein 1 OS=Homo sapiens GN=ARRDC1 PE=1 SV=1 - [ARRD1_HUMAN]	21.4561	18.01	1	5	5	7	5.87564e+06	1.04145	4	4.85628	433	45.9527	7.02002
P60981	Destrin OS=Homo sapiens GN=DSTN PE=1 SV=3 - [DEST_HUMAN]	11.6665	16.97	1	2	2	3	7.0699e+06	1.04114	2	3.81223	165	18.4935	7.85498
Q2M329	Coiled-coil domain-containing protein 96 OS=Homo sapiens GN=CCDC96 PE=2 SV=2 - [CCD96_HUMAN]	7.41851	1.26	1	1	1	3	1.97073e+06	1.03979	1		555	62.6726	4.94482
P61158	Actin-related protein 3 OS=Homo sapiens GN=ACTR3 PE=1 SV=3 - [ARP3_HUMAN]	31.2271	10.05	3	4	4	9	2.30875e+06	1.03973	4	7.44139	418	47.341	5.88428
Q16181	Septin-7 OS=Homo sapiens GN=SEPT7 PE=1 SV=2 - [SEPT7_HUMAN]	15.5709	5.95	5	2	2	6	5.20111e+06	1.03864	3	3.76845	437	50.648	8.63135
P05141	ADP/ATP translocase 2 OS=Homo sapiens GN=SLC25A5 PE=1 SV=7 - [ADT2_HUMAN]	3.00705	3.36	3	1	1	1	1.74976e+06	1.03844	1		298	32.8312	9.68604
O95837	Guanine nucleotide-binding protein subunit alpha-14 OS=Homo sapiens GN=GNA14 PE=1 SV=1 - [GNA14_HUMAN]	34.3881	13.24	3	4	4	8	2.52427e+06	1.03841	4	13.6209	355	41.5442	6.07471
Q9BU68	Proline-rich protein 15-like protein OS=Homo sapiens GN=PRR15L PE=3 SV=1 - [PR15L_HUMAN]	18.4109	48.54	1	2	2	5	5.34338e+06	1.03615	1		103	11.6981	9.49561
Q9BR76	Coronin-1B OS=Homo sapiens GN=CORO1B PE=1 SV=1 - [COR1B_HUMAN]	3.06704	7.57	1	1	1	1	4.19303e+06	1.03607	1		489	54.2003	5.88428
P52597	Heterogeneous nuclear ribonucleoprotein F OS=Homo sapiens GN=HNRNPF PE=1 SV=3 - [HNRPF_HUMAN]	18.7412	7.95	1	1	2	4	1.42462e+06	1.03372	1		415	45.6429	5.57959
A4D1S0	Killer cell lectin-like receptor subfamily G member 2 OS=Homo sapiens GN=KLRG2 PE=1 SV=3 - [KLRG2_HUMAN]	15.2866	7.33	1	2	2	4	3.68062e+06	1.03337	2	2.02338	409	42.8234	5.87158
P61254	60S ribosomal protein L26 OS=Homo sapiens GN=RPL26 PE=1 SV=1 - [RL26_HUMAN]	30.3477	28.28	2	6	6	11	4.13399e+06	1.02907	6	5.7096	145	17.2475	10.5503
Q9NZW5	MAGUK p55 subfamily member 6 OS=Homo sapiens GN=MPP6 PE=1 SV=2 - [MPP6_HUMAN]	12.2243	3.7	1	1	1	3	1.00738e+06	1.02884	2	0.412683	540	61.0788	6.17627
P63010	AP-2 complex subunit beta OS=Homo sapiens GN=AP2B1 PE=1 SV=1 - [AP2B1_HUMAN]	5.67903	1.92	1	1	2	2	1.57454e+06	1.02826	1		937	104.486	5.37646
Q16625	Occludin OS=Homo sapiens GN=OCLN PE=1 SV=1 - [OCLN_HUMAN]	2.82493	1.92	1	1	1	1	1.32157e+06	1.02726	1		522	59.1061	6.0874
P0DMV8	Heat shock 70 kDa protein 1A OS=Homo sapiens GN=HSPA1A PE=1 SV=1 - [HS71A_HUMAN]	97.6938	24.96	3	10	12	27	2.49846e+07	1.02719	9	7.24647	641	70.009	5.65576
P35637	RNA-binding protein FUS OS=Homo sapiens GN=FUS PE=1 SV=1 - [FUS_HUMAN]	6.91518	7.6	1	2	2	2	1.67282e+06	1.02598	2	2.45153	526	53.3938	9.36377
P0C0S5	Histone H2A.Z OS=Homo sapiens GN=H2AFZ PE=1 SV=2 - [H2AZ_HUMAN]	16.7731	23.44	2	1	3	7	4.5804e+07	1.02585	1		128	13.5446	10.5796
P13010	X-ray repair cross-complementing protein 5 OS=Homo sapiens GN=XRCC5 PE=1 SV=3 - [XRCC5_HUMAN]	14.7397	6.01	1	2	2	4	1.13957e+06	1.02569	2	11.2455	732	82.6523	5.80811
P62266	40S ribosomal protein S23 OS=Homo sapiens GN=RPS23 PE=1 SV=3 - [RS23_HUMAN]	15.9051	16.08	1	2	2	4	1.0858e+07	1.02562	2	0.408833	143	15.7977	10.4917
Q96TA1	Niban-like protein 1 OS=Homo sapiens GN=FAM129B PE=1 SV=3 - [NIBL1_HUMAN]	64.1955	23.59	1	9	9	18	8.87284e+06	1.02536	9	9.54602	746	84.0847	6.18896
P09543	2',3'-cyclic-nucleotide 3'-phosphodiesterase OS=Homo sapiens GN=CNP PE=1 SV=2 - [CN37_HUMAN]	24.4814	8.31	1	4	4	8	4.08192e+06	1.02464	4	21.6878	421	47.5487	9.0708
P62140	Serine/threonine-protein phosphatase PP1-beta catalytic subunit OS=Homo sapiens GN=PPP1CB PE=1 SV=3 - [PP1B_HUMAN]	16.6486	12.54	2	2	4	5	3.73163e+06	1.02404	2	19.4592	327	37.1626	6.18896
Q92841	Probable ATP-dependent RNA helicase DDX17 OS=Homo sapiens GN=DDX17 PE=1 SV=2 - [DDX17_HUMAN]	4.29781	3.57	1	2	2	2	774266	1.0237	1		729	80.222	8.26514
Q13813	Spectrin alpha chain, non-erythrocytic 1 OS=Homo sapiens GN=SPTAN1 PE=1 SV=3 - [SPTN1_HUMAN]	3.64293	0.77	1	1	1	1	846704	1.02283	1		2472	284.364	5.35107
P61247	40S ribosomal protein S3a OS=Homo sapiens GN=RPS3A PE=1 SV=2 - [RS3A_HUMAN]	5.15926	7.95	1	2	2	2	5.78722e+06	1.02044	1		264	29.9257	9.72998
P61006	Ras-related protein Rab-8A OS=Homo sapiens GN=RAB8A PE=1 SV=1 - [RAB8A_HUMAN]	37.8454	17.39	19	1	4	11	1.4671e+07	1.01988	1		207	23.6532	9.0708
O75083	WD repeat-containing protein 1 OS=Homo sapiens GN=WDR1 PE=1 SV=4 - [WDR1_HUMAN]	17.7711	6.27	1	2	2	4	3.69799e+06	1.01872	2	10.1167	606	66.1519	6.65381
Q6P1M3	Lethal(2) giant larvae protein homolog 2 OS=Homo sapiens GN=LLGL2 PE=1 SV=2 - [L2GL2_HUMAN]	146.482	26.96	1	18	18	38	1.56503e+07	1.01822	18	9.50444	1020	113.377	7.51807
Q15019	Septin-2 OS=Homo sapiens GN=SEPT2 PE=1 SV=1 - [SEPT2_HUMAN]	28.7953	20.78	1	5	5	7	3.05616e+06	1.01784	3	24.2845	361	41.4613	6.59521
Q06830	Peroxiredoxin-1 OS=Homo sapiens GN=PRDX1 PE=1 SV=1 - [PRDX1_HUMAN]	34.1655	31.16	2	6	7	13	1.05355e+07	1.01748	7	6.151	199	22.0963	8.1333
Q8WUM4	Programmed cell death 6-interacting protein OS=Homo sapiens GN=PDCD6IP PE=1 SV=1 - [PDC6I_HUMAN]	3.67218	1.96	1	1	1	2	90532.3	1.01744	1		868	95.9631	6.52197
P62244	40S ribosomal protein S15a OS=Homo sapiens GN=RPS15A PE=1 SV=2 - [RS15A_HUMAN]	13.0638	23.85	1	3	3	4	4.9136e+06	1.01672	3	6.33541	130	14.83	10.1255
P60660	Myosin light polypeptide 6 OS=Homo sapiens GN=MYL6 PE=1 SV=2 - [MYL6_HUMAN]	65.3237	45.03	4	5	5	16	1.22667e+07	1.01668	5	7.33535	151	16.9191	4.65283
Q70J99	Protein unc-13 homolog D OS=Homo sapiens GN=UNC13D PE=1 SV=1 - [UN13D_HUMAN]	9.21992	3.12	1	2	2	3	991630	1.01659	2	16.885	1090	123.205	6.65381
P22735	Protein-glutamine gamma-glutamyltransferase K OS=Homo sapiens GN=TGM1 PE=1 SV=4 - [TGM1_HUMAN]	7.74492	1.47	1	1	1	2	2.33991e+06	1.01646	1		817	89.7303	6.03662
P13639	Elongation factor 2 OS=Homo sapiens GN=EEF2 PE=1 SV=4 - [EF2_HUMAN]	142.903	28.44	2	18	18	44	1.43929e+07	1.01595	23	9.78498	858	95.277	6.82959
P15880	40S ribosomal protein S2 OS=Homo sapiens GN=RPS2 PE=1 SV=2 - [RS2_HUMAN]	16.3479	13.65	1	3	3	5	5.3555e+06	1.01594	3	6.54138	293	31.3046	10.2427
P21333	Filamin-A OS=Homo sapiens GN=FLNA PE=1 SV=4 - [FLNA_HUMAN]	33.0222	3.36	2	5	6	8	1.82562e+06	1.0159	5	10.9294	2647	280.564	6.06201
P62750	60S ribosomal protein L23a OS=Homo sapiens GN=RPL23A PE=1 SV=1 - [RL23A_HUMAN]	10.6285	21.79	1	4	4	4	4.15863e+06	1.01541	3	0.470056	156	17.6841	10.4478
P41743	Protein kinase C iota type OS=Homo sapiens GN=PRKCI PE=1 SV=2 - [KPCI_HUMAN]	24.0313	15.27	1	5	5	6	2.75401e+06	1.01458	5	18.1334	596	68.2183	5.84619
P51153	Ras-related protein Rab-13 OS=Homo sapiens GN=RAB13 PE=1 SV=1 - [RAB13_HUMAN]	18.421	10.84	1	1	2	6	1.03511e+07	1.01441	1		203	22.7597	9.18799
O00159	Unconventional myosin-Ic OS=Homo sapiens GN=MYO1C PE=1 SV=4 - [MYO1C_HUMAN]	187.641	28.13	1	26	26	53	1.15248e+07	1.01332	27	12.4417	1063	121.606	9.40771
Q15149	Plectin OS=Homo sapiens GN=PLEC PE=1 SV=3 - [PLEC_HUMAN]	28.5041	2.88	1	8	9	11	6.82884e+06	1.0133	7	15.3308	4684	531.466	5.96045
P23396	40S ribosomal protein S3 OS=Homo sapiens GN=RPS3 PE=1 SV=2 - [RS3_HUMAN]	41.4395	33.33	1	7	7	12	6.69409e+06	1.01171	7	11.6685	243	26.6714	9.65674
P84098	60S ribosomal protein L19 OS=Homo sapiens GN=RPL19 PE=1 SV=1 - [RL19_HUMAN]	9.45424	13.78	1	2	2	3	3.88773e+06	1.01124	2	19.2297	196	23.4512	11.4731
P61956	Small ubiquitin-related modifier 2 OS=Homo sapiens GN=SUMO2 PE=1 SV=3 - [SUMO2_HUMAN]	8.31733	12.63	3	1	1	2	3.92415e+06	1.01068	1		95	10.8644	5.50342
P62847	40S ribosomal protein S24 OS=Homo sapiens GN=RPS24 PE=1 SV=1 - [RS24_HUMAN]	16.302	18.05	1	2	2	4	2.60129e+06	1.01066	2	29.4771	133	15.4134	10.7847
P55196	Afadin OS=Homo sapiens GN=MLLT4 PE=1 SV=3 - [AFAD_HUMAN]	39.0971	6.03	1	7	7	10	4.64375e+06	1.01034	7	11.1478	1824	206.676	6.46826
P30085	UMP-CMP kinase OS=Homo sapiens GN=CMPK1 PE=1 SV=3 - [KCY_HUMAN]	13.6441	8.67	1	1	1	4	1.29726e+06	1.00968	2	6.17659	196	22.2083	5.56689
Q15056	Eukaryotic translation initiation factor 4H OS=Homo sapiens GN=EIF4H PE=1 SV=5 - [IF4H_HUMAN]	3.22129	5.65	1	1	1	1	4.49751e+06	1.00957	1		248	27.3684	7.2251
P60842	Eukaryotic initiation factor 4A-I OS=Homo sapiens GN=EIF4A1 PE=1 SV=1 - [IF4A1_HUMAN]	49.5813	18.47	3	6	6	13	9.2394e+06	1.00928	7	15.4233	406	46.1246	5.47803
Q14118	Dystroglycan OS=Homo sapiens GN=DAG1 PE=1 SV=2 - [DAG1_HUMAN]	38.8948	8.49	1	5	5	12	5.32047e+06	1.00917	6	5.92001	895	97.3807	8.55811
Q9NR30	Nucleolar RNA helicase 2 OS=Homo sapiens GN=DDX21 PE=1 SV=5 - [DDX21_HUMAN]	19.8795	5.62	1	3	3	4	1.57232e+06	1.00902	3	8.62286	783	87.2904	9.27588
Q9Y508	E3 ubiquitin-protein ligase RNF114 OS=Homo sapiens GN=RNF114 PE=1 SV=1 - [RN114_HUMAN]	3.19886	4.39	1	1	1	1	2.45175e+06	1.00837	1		228	25.6773	7.25439
Q01650	Large neutral amino acids transporter small subunit 1 OS=Homo sapiens GN=SLC7A5 PE=1 SV=2 - [LAT1_HUMAN]	9.4026	3.55	1	1	1	2	4.31752e+06	1.00591	1		507	54.9743	7.72314
P62899	60S ribosomal protein L31 OS=Homo sapiens GN=RPL31 PE=1 SV=1 - [RL31_HUMAN]	5.5426	13.6	1	2	2	2	4.29675e+06	1.0053	2	15.4255	125	14.4539	10.5356
P35579	Myosin-9 OS=Homo sapiens GN=MYH9 PE=1 SV=4 - [MYH9_HUMAN]	234.687	23.16	3	34	34	60	8.4005e+06	1.00499	36	12.5652	1960	226.392	5.60498
P78527	DNA-dependent protein kinase catalytic subunit OS=Homo sapiens GN=PRKDC PE=1 SV=3 - [PRKDC_HUMAN]	3.47759	0.9	1	2	2	2	152580	1.00436	1		4128	468.788	7.12256
P09110	3-ketoacyl-CoA thiolase, peroxisomal OS=Homo sapiens GN=ACAA1 PE=1 SV=2 - [THIK_HUMAN]	2.42949	4.95	1	1	1	1	103670	1.00409	1		424	44.2639	8.44092
Q96E39	RNA binding motif protein, X-linked-like-1 OS=Homo sapiens GN=RBMXL1 PE=1 SV=1 - [RMXL1_HUMAN]	7.65849	3.33	2	1	1	2	2.2888e+06	1.00214	1		390	42.1162	9.89111
O75367	Core histone macro-H2A.1 OS=Homo sapiens GN=H2AFY PE=1 SV=4 - [H2AY_HUMAN]	10.1597	5.91	1	1	1	2	1.81242e+06	1.00188	1		372	39.5925	9.78857
P62873	Guanine nucleotide-binding protein G(I)/G(S)/G(T) subunit beta-1 OS=Homo sapiens GN=GNB1 PE=1 SV=3 - [GBB1_HUMAN]	26.4006	11.47	4	4	4	12	3.32217e+07	1.00163	5	10.3096	340	37.353	5.99854
P50995	Annexin A11 OS=Homo sapiens GN=ANXA11 PE=1 SV=1 - [ANX11_HUMAN]	26.5291	6.93	1	3	3	7	2.38834e+06	1.00025	3	24.7786	505	54.3551	7.6499
P19338	Nucleolin OS=Homo sapiens GN=NCL PE=1 SV=3 - [NUCL_HUMAN]	41.2894	11.27	1	6	6	11	6.95589e+06	1.00022	6	4.67813	710	76.5684	4.70361
P23588	Eukaryotic translation initiation factor 4B OS=Homo sapiens GN=EIF4B PE=1 SV=2 - [IF4B_HUMAN]	9.66785	6.71	1	2	2	3	1.41095e+06	1	2	36.0787	611	69.1103	5.73193
Q9H3N1	Thioredoxin-related transmembrane protein 1 OS=Homo sapiens GN=TMX1 PE=1 SV=1 - [TMX1_HUMAN]	3.03748	3.57	1	1	1	1	2.38671e+06	0.999822	1		280	31.7708	4.98291
Q08211	ATP-dependent RNA helicase A OS=Homo sapiens GN=DHX9 PE=1 SV=4 - [DHX9_HUMAN]	21.0207	5.35	1	5	5	6	1.67943e+06	0.999577	5	1.79406	1270	140.869	6.84424
Q96IU4	Alpha/beta hydrolase domain-containing protein 14B OS=Homo sapiens GN=ABHD14B PE=1 SV=1 - [ABHEB_HUMAN]	2.3221	6.19	1	1	1	1	1.39184e+06	0.997587	1		210	22.3316	6.40479
P07910	Heterogeneous nuclear ribonucleoproteins C1/C2 OS=Homo sapiens GN=HNRNPC PE=1 SV=4 - [HNRPC_HUMAN]	17.3377	9.15	4	2	2	4	5.99048e+06	0.997186	3	0.661813	306	33.6495	5.08447
Q5T0Z8	Uncharacterized protein C6orf132 OS=Homo sapiens GN=C6orf132 PE=1 SV=4 - [CF132_HUMAN]	2.67497	1.35	1	1	1	1	1.44206e+06	0.995659	1		1188	123.958	9.45166
P19367	Hexokinase-1 OS=Homo sapiens GN=HK1 PE=1 SV=3 - [HXK1_HUMAN]	7.43483	2.51	2	1	2	2	2.23644e+06	0.99534	1		917	102.42	6.80029
P62269	40S ribosomal protein S18 OS=Homo sapiens GN=RPS18 PE=1 SV=3 - [RS18_HUMAN]	45.7872	32.89	1	5	5	13	4.27855e+06	0.993923	5	11.8977	152	17.7079	10.9897
Q6NXT2	Histone H3.3C OS=Homo sapiens GN=H3F3C PE=1 SV=3 - [H3C_HUMAN]	14.8027	11.85	5	2	2	6	2.35644e+07	0.993373	2	13.8069	135	15.2044	11.1069
P07947	Tyrosine-protein kinase Yes OS=Homo sapiens GN=YES1 PE=1 SV=3 - [YES_HUMAN]	99.7068	29.1	27	9	13	31	9.07044e+06	0.991899	10	10.5783	543	60.7625	6.7417
O00401	Neural Wiskott-Aldrich syndrome protein OS=Homo sapiens GN=WASL PE=1 SV=2 - [WASL_HUMAN]	9.00295	7.33	1	2	2	3	2.23249e+06	0.991832	2	1.62391	505	54.7927	7.92822
P08195	4F2 cell-surface antigen heavy chain OS=Homo sapiens GN=SLC3A2 PE=1 SV=3 - [4F2_HUMAN]	9.42826	4.13	1	2	2	3	2.95683e+06	0.98994	3	7.37408	630	67.9517	5.0083
P18085	ADP-ribosylation factor 4 OS=Homo sapiens GN=ARF4 PE=1 SV=3 - [ARF4_HUMAN]	29.3986	27.22	1	2	4	8	1.28927e+07	0.988619	1		180	20.4977	7.13721
P08729	Keratin, type II cytoskeletal 7 OS=Homo sapiens GN=KRT7 PE=1 SV=5 - [K2C7_HUMAN]	136.568	36.89	8	13	18	40	3.48257e+07	0.988604	15	8.7169	469	51.3543	5.47803
P26373	60S ribosomal protein L13 OS=Homo sapiens GN=RPL13 PE=1 SV=4 - [RL13_HUMAN]	15.3547	14.22	1	3	3	5	5.57983e+06	0.987536	3	0.259975	211	24.2465	11.6489
Q99426	Tubulin-folding cofactor B OS=Homo sapiens GN=TBCB PE=1 SV=2 - [TBCB_HUMAN]	16.2227	17.21	1	4	4	5	3.30376e+06	0.987105	3	1.72321	244	27.3085	5.14795
Q13243	Serine/arginine-rich splicing factor 5 OS=Homo sapiens GN=SRSF5 PE=1 SV=1 - [SRSF5_HUMAN]	2.51665	3.31	3	1	1	1	2.30535e+06	0.985363	1		272	31.2453	11.5903
P21266	Glutathione S-transferase Mu 3 OS=Homo sapiens GN=GSTM3 PE=1 SV=3 - [GSTM3_HUMAN]	13.8778	11.11	3	2	2	5	875653	0.984736	2	14.8879	225	26.5421	5.5415
P49411	Elongation factor Tu, mitochondrial OS=Homo sapiens GN=TUFM PE=1 SV=2 - [EFTU_HUMAN]	9.14099	8.41	1	3	3	3	3.87515e+06	0.984138	3	30.9151	452	49.5102	7.60596
P46940	Ras GTPase-activating-like protein IQGAP1 OS=Homo sapiens GN=IQGAP1 PE=1 SV=1 - [IQGA1_HUMAN]	96.6345	15.75	2	16	17	28	6.58259e+06	0.983741	14	10.7703	1657	189.134	6.48096
Q15599	Na(+)/H(+) exchange regulatory cofactor NHE-RF2 OS=Homo sapiens GN=SLC9A3R2 PE=1 SV=2 - [NHRF2_HUMAN]	120.339	38.87	1	10	10	37	2.30439e+07	0.983309	17	6.46743	337	37.391	7.92822
P50990	T-complex protein 1 subunit theta OS=Homo sapiens GN=CCT8 PE=1 SV=4 - [TCPQ_HUMAN]	4.68087	2.74	1	1	1	1	1.22027e+06	0.982978	1		548	59.5825	5.60498
P04899	Guanine nucleotide-binding protein G(i) subunit alpha-2 OS=Homo sapiens GN=GNAI2 PE=1 SV=3 - [GNAI2_HUMAN]	35.5425	11.27	7	1	4	11	2.66344e+07	0.981966	1		355	40.4251	5.5415
P06748	Nucleophosmin OS=Homo sapiens GN=NPM1 PE=1 SV=2 - [NPM_HUMAN]	23.4456	15.99	1	4	4	6	5.8034e+06	0.981934	4	3.15591	294	32.5548	4.77979
Q01130	Serine/arginine-rich splicing factor 2 OS=Homo sapiens GN=SRSF2 PE=1 SV=4 - [SRSF2_HUMAN]	5.84271	3.62	2	1	1	2	2.43167e+06	0.981738	1		221	25.4612	11.854
Q7KZF4	Staphylococcal nuclease domain-containing protein 1 OS=Homo sapiens GN=SND1 PE=1 SV=1 - [SND1_HUMAN]	116.049	24.51	1	18	18	35	7.89073e+06	0.981415	19	8.1726	910	101.934	7.1665
P40616	ADP-ribosylation factor-like protein 1 OS=Homo sapiens GN=ARL1 PE=1 SV=1 - [ARL1_HUMAN]	9.65288	8.84	1	1	1	3	390956	0.979874	2	1.66657	181	20.4044	5.71924
Q6A1A2	Putative 3-phosphoinositide-dependent protein kinase 2 OS=Homo sapiens GN=PDPK2P PE=5 SV=1 - [PDPK2_HUMAN]	13.2803	13.13	2	3	3	4	1.60119e+06	0.979785	2	0.671532	396	44.737	8.36768
P31948	Stress-induced-phosphoprotein 1 OS=Homo sapiens GN=STIP1 PE=1 SV=1 - [STIP1_HUMAN]	24.288	7.18	1	4	4	7	1.72424e+06	0.977947	3	11.2158	543	62.5994	6.80029
P07355	Annexin A2 OS=Homo sapiens GN=ANXA2 PE=1 SV=2 - [ANXA2_HUMAN]	237.427	50.15	2	17	17	56	4.49585e+07	0.976713	22	5.3353	339	38.5798	7.75244
P18621	60S ribosomal protein L17 OS=Homo sapiens GN=RPL17 PE=1 SV=3 - [RL17_HUMAN]	3.32238	14.13	1	2	2	2	3.15655e+06	0.97664	2	0.588337	184	21.3833	10.1694
P22061	Protein-L-isoaspartate(D-aspartate) O-methyltransferase OS=Homo sapiens GN=PCMT1 PE=1 SV=4 - [PIMT_HUMAN]	6.24038	11.45	1	2	2	2	1.96335e+06	0.976425	2	15.6534	227	24.6206	7.21045
P20042	Eukaryotic translation initiation factor 2 subunit 2 OS=Homo sapiens GN=EIF2S2 PE=1 SV=2 - [IF2B_HUMAN]	3.20057	6.01	1	1	1	1	1.01178e+06	0.976233	1		333	38.3644	5.79541
Q93096	Protein tyrosine phosphatase type IVA 1 OS=Homo sapiens GN=PTP4A1 PE=1 SV=2 - [TP4A1_HUMAN]	9.99957	31.79	1	2	3	3	2.47805e+06	0.975192	2	1.20948	173	19.8022	8.96826
P27635	60S ribosomal protein L10 OS=Homo sapiens GN=RPL10 PE=1 SV=4 - [RL10_HUMAN]	7.95204	15.89	2	3	3	4	3.04063e+06	0.973663	1		214	24.5879	10.0815
Q9C005	Protein dpy-30 homolog OS=Homo sapiens GN=DPY30 PE=1 SV=1 - [DPY30_HUMAN]	44.6913	58.59	1	4	4	12	2.00783e+06	0.973489	4	5.06901	99	11.2428	4.88135
Q9UGI8	Testin OS=Homo sapiens GN=TES PE=1 SV=1 - [TES_HUMAN]	25.7647	11.16	1	5	5	8	4.62823e+06	0.972035	4	16.0757	421	47.9639	7.6792
P11233	Ras-related protein Ral-A OS=Homo sapiens GN=RALA PE=1 SV=1 - [RALA_HUMAN]	38.7529	26.21	1	2	4	10	5.20914e+06	0.971982	2	3.03657	206	23.552	7.10791
O60739	Eukaryotic translation initiation factor 1b OS=Homo sapiens GN=EIF1B PE=1 SV=2 - [EIF1B_HUMAN]	3.0945	13.27	1	1	1	1	4.3441e+06	0.969853	1		113	12.8157	7.37158
P05023	Sodium/potassium-transporting ATPase subunit alpha-1 OS=Homo sapiens GN=ATP1A1 PE=1 SV=1 - [AT1A1_HUMAN]	114.46	21.6	6	14	14	29	9.96378e+06	0.969107	15	6.13279	1023	112.824	5.49072
P47914	60S ribosomal protein L29 OS=Homo sapiens GN=RPL29 PE=1 SV=2 - [RL29_HUMAN]	8.27433	9.43	1	1	1	2	6.92234e+06	0.968747	1		159	17.7411	11.6636
Q9H3K6	BolA-like protein 2 OS=Homo sapiens GN=BOLA2 PE=1 SV=1 - [BOLA2_HUMAN]	10.5814	29.07	1	2	2	3	7.89808e+06	0.967948	2	6.18922	86	10.1102	6.52197
Q96RT1	Protein LAP2 OS=Homo sapiens GN=ERBB2IP PE=1 SV=2 - [LAP2_HUMAN]	5.25471	3.12	1	2	2	2	253096	0.9676	2	4.28731	1412	158.2	5.50342
P62249	40S ribosomal protein S16 OS=Homo sapiens GN=RPS16 PE=1 SV=2 - [RS16_HUMAN]	23.9469	35.62	1	5	5	8	4.5174e+06	0.967392	5	21.6961	146	16.435	10.2134
P00338	L-lactate dehydrogenase A chain OS=Homo sapiens GN=LDHA PE=1 SV=2 - [LDHA_HUMAN]	21.1276	18.07	2	5	5	8	5.51102e+06	0.967201	4	10.6665	332	36.6654	8.26514
P68032	Actin, alpha cardiac muscle 1 OS=Homo sapiens GN=ACTC1 PE=1 SV=1 - [ACTC_HUMAN]	255.382	32.1	4	3	15	80	2.17985e+08	0.965614	6	5.54478	377	41.9919	5.38916
Q01518	Adenylyl cyclase-associated protein 1 OS=Homo sapiens GN=CAP1 PE=1 SV=5 - [CAP1_HUMAN]	2.59041	4.84	1	1	1	1	365934	0.96365	1		475	51.8687	8.06006
P23528	Cofilin-1 OS=Homo sapiens GN=CFL1 PE=1 SV=3 - [COF1_HUMAN]	39.8752	42.17	2	4	4	9	1.67083e+07	0.96143	5	8.99205	166	18.4907	8.08936
Q4KMP7	TBC1 domain family member 10B OS=Homo sapiens GN=TBC1D10B PE=1 SV=3 - [TB10B_HUMAN]	2.42948	3.34	1	1	1	1	3.46487e+06	0.96085	1		808	87.1447	9.18799
P58107	Epiplakin OS=Homo sapiens GN=EPPK1 PE=1 SV=2 - [EPIPL_HUMAN]	25.5998	8.9	1	4	5	7	2.4502e+06	0.959803	4	9.93105	5090	555.279	5.60498
P07737	Profilin-1 OS=Homo sapiens GN=PFN1 PE=1 SV=2 - [PROF1_HUMAN]	44.5911	49.29	1	7	7	13	1.27991e+07	0.958184	6	17.8336	140	15.0446	8.26514
P43243	Matrin-3 OS=Homo sapiens GN=MATR3 PE=1 SV=2 - [MATR3_HUMAN]	19.1958	10.15	1	4	4	6	1.12467e+06	0.956828	3	7.04369	847	94.5648	6.25244
P46777	60S ribosomal protein L5 OS=Homo sapiens GN=RPL5 PE=1 SV=3 - [RL5_HUMAN]	12.1212	8.75	1	2	2	5	4.58751e+06	0.956535	2	0.0950314	297	34.3407	9.71533
P61513	60S ribosomal protein L37a OS=Homo sapiens GN=RPL37A PE=1 SV=2 - [RL37A_HUMAN]	10.7258	19.57	1	1	1	2	6.5425e+06	0.955797	1		92	10.2685	10.4331
O14678	ATP-binding cassette sub-family D member 4 OS=Homo sapiens GN=ABCD4 PE=1 SV=1 - [ABCD4_HUMAN]	28.388	12.54	1	5	5	7	8.9144e+06	0.954791	4	3.13449	606	68.5536	6.55127
Q9BXI6	TBC1 domain family member 10A OS=Homo sapiens GN=TBC1D10A PE=1 SV=1 - [TB10A_HUMAN]	36.9792	14.96	1	5	5	10	3.95312e+06	0.953918	5	26.1761	508	57.0813	8.44092
P16435	NADPH--cytochrome P450 reductase OS=Homo sapiens GN=POR PE=1 SV=2 - [NCPR_HUMAN]	0	3.99	1	2	2	2	345582	0.953751	2	11.694	677	76.6413	5.57959
P31689	DnaJ homolog subfamily A member 1 OS=Homo sapiens GN=DNAJA1 PE=1 SV=2 - [DNJA1_HUMAN]	29.3695	9.32	1	2	2	9	3.39433e+06	0.953649	4	13.2479	397	44.8395	7.07861
Q86X29	Lipolysis-stimulated lipoprotein receptor OS=Homo sapiens GN=LSR PE=1 SV=4 - [LSR_HUMAN]	50.8076	19.72	1	9	9	17	6.75822e+06	0.953511	9	5.7854	649	71.3939	7.97217
O96013	Serine/threonine-protein kinase PAK 4 OS=Homo sapiens GN=PAK4 PE=1 SV=1 - [PAK4_HUMAN]	60.7796	22.17	1	9	9	17	4.3384e+06	0.953121	10	18.5926	591	64.0322	9.72998
P62263	40S ribosomal protein S14 OS=Homo sapiens GN=RPS14 PE=1 SV=3 - [RS14_HUMAN]	17.8263	24.5	1	3	3	5	5.22325e+06	0.952832	3	15.9562	151	16.2625	10.0522
P07237	Protein disulfide-isomerase OS=Homo sapiens GN=P4HB PE=1 SV=3 - [PDIA1_HUMAN]	12.1011	6.1	1	2	2	3	874240	0.952586	2	18.8506	508	57.0807	4.86865
P50991	T-complex protein 1 subunit delta OS=Homo sapiens GN=CCT4 PE=1 SV=4 - [TCPD_HUMAN]	12.8358	10.02	1	4	4	4	2.17666e+06	0.952551	2	5.29235	539	57.8878	7.82568
P31943	Heterogeneous nuclear ribonucleoprotein H OS=Homo sapiens GN=HNRNPH1 PE=1 SV=4 - [HNRH1_HUMAN]	19.8631	7.35	2	1	2	4	2.55806e+06	0.952158	1		449	49.1984	6.30322
P84095	Rho-related GTP-binding protein RhoG OS=Homo sapiens GN=RHOG PE=1 SV=1 - [RHOG_HUMAN]	21.4145	29.84	1	4	4	6	4.52411e+06	0.950692	4	5.37442	191	21.2949	8.11865
P63241	Eukaryotic translation initiation factor 5A-1 OS=Homo sapiens GN=EIF5A PE=1 SV=2 - [IF5A1_HUMAN]	30.7995	27.92	3	3	3	7	6.25916e+06	0.950283	3	1.05349	154	16.8214	5.23682
Q15365	Poly(rC)-binding protein 1 OS=Homo sapiens GN=PCBP1 PE=1 SV=2 - [PCBP1_HUMAN]	45.8068	21.07	3	3	5	12	6.11525e+06	0.949522	3	0.561644	356	37.4739	7.09326
P23246	Splicing factor, proline- and glutamine-rich OS=Homo sapiens GN=SFPQ PE=1 SV=2 - [SFPQ_HUMAN]	20.3535	8.77	2	4	4	7	3.10104e+06	0.948437	4	11.7377	707	76.1016	9.43701
P04792	Heat shock protein beta-1 OS=Homo sapiens GN=HSPB1 PE=1 SV=2 - [HSPB1_HUMAN]	120.842	56.59	1	7	7	29	3.73335e+07	0.948159	10	9.431	205	22.7685	6.40479
P04406	Glyceraldehyde-3-phosphate dehydrogenase OS=Homo sapiens GN=GAPDH PE=1 SV=3 - [G3P_HUMAN]	128.397	41.49	1	8	8	34	4.3855e+07	0.947991	13	5.15531	335	36.0304	8.45557
O60841	Eukaryotic translation initiation factor 5B OS=Homo sapiens GN=EIF5B PE=1 SV=4 - [IF2P_HUMAN]	7.14696	2.3	1	2	2	2	3.01739e+06	0.947416	2	16.4763	1220	138.742	5.49072
O15031	Plexin-B2 OS=Homo sapiens GN=PLXNB2 PE=1 SV=3 - [PLXB2_HUMAN]	28.1098	5.17	1	6	6	8	3.3884e+06	0.946462	4	17.1927	1838	204.997	6.23975
P37802	Transgelin-2 OS=Homo sapiens GN=TAGLN2 PE=1 SV=3 - [TAGL2_HUMAN]	10.9854	11.06	1	2	2	3	6.23503e+06	0.945726	2	0.876147	199	22.3772	8.25049
P12931	Proto-oncogene tyrosine-protein kinase Src OS=Homo sapiens GN=SRC PE=1 SV=3 - [SRC_HUMAN]	68.7815	19.4	1	5	8	19	7.82782e+06	0.945567	5	9.79901	536	59.797	7.41553
O15498	Synaptobrevin homolog YKT6 OS=Homo sapiens GN=YKT6 PE=1 SV=1 - [YKT6_HUMAN]	11.1666	12.63	1	2	2	3	1.65595e+06	0.945398	2	11.8669	198	22.4034	6.91748
Q8IUE6	Histone H2A type 2-B OS=Homo sapiens GN=HIST2H2AB PE=1 SV=3 - [H2A2B_HUMAN]	10.8861	35.38	1	2	3	4	3.5617e+07	0.945092	2	6.80532	130	13.9868	10.8872
P36578	60S ribosomal protein L4 OS=Homo sapiens GN=RPL4 PE=1 SV=5 - [RL4_HUMAN]	23.2109	14.52	1	5	5	7	3.21714e+06	0.944451	5	9.7692	427	47.6674	11.063
O95782	AP-2 complex subunit alpha-1 OS=Homo sapiens GN=AP2A1 PE=1 SV=3 - [AP2A1_HUMAN]	7.98302	3.89	2	2	2	2	1.0654e+06	0.944061	2	0.59552	977	107.478	7.03467
Q9NW13	RNA-binding protein 28 OS=Homo sapiens GN=RBM28 PE=1 SV=3 - [RBM28_HUMAN]	5.71817	2.9	1	1	1	2	237683	0.943295	1		759	85.6847	9.21729
P06753	Tropomyosin alpha-3 chain OS=Homo sapiens GN=TPM3 PE=1 SV=2 - [TPM3_HUMAN]	21.2108	16.49	3	1	4	8	1.01349e+07	0.94324	1		285	32.9298	4.71631
P63092	Guanine nucleotide-binding protein G(s) subunit alpha isoforms short OS=Homo sapiens GN=GNAS PE=1 SV=1 - [GNAS2_HUMAN]	111.93	34.77	7	11	12	39	4.36955e+07	0.942793	14	6.01878	394	45.6359	5.8208
Q96IG2	F-box/LRR-repeat protein 20 OS=Homo sapiens GN=FBXL20 PE=1 SV=2 - [FXL20_HUMAN]	3.04112	1.83	1	1	1	1	3.65192e+06	0.942292	1		436	48.3915	7.48877
P30101	Protein disulfide-isomerase A3 OS=Homo sapiens GN=PDIA3 PE=1 SV=4 - [PDIA3_HUMAN]	27.0792	19.01	1	6	6	8	4.01524e+06	0.94212	5	4.46245	505	56.7468	6.354
Q00610	Clathrin heavy chain 1 OS=Homo sapiens GN=CLTC PE=1 SV=5 - [CLH1_HUMAN]	41.9779	5.19	2	6	6	11	3.35145e+06	0.939752	5	20.0813	1675	191.493	5.69385
P29401	Transketolase OS=Homo sapiens GN=TKT PE=1 SV=3 - [TKT_HUMAN]	36.4265	13.48	1	5	5	8	5.2519e+06	0.93937	4	17.7117	623	67.8347	7.66455
O14908	PDZ domain-containing protein GIPC1 OS=Homo sapiens GN=GIPC1 PE=1 SV=2 - [GIPC1_HUMAN]	2.9531	9.31	1	2	2	2	1.73955e+06	0.938916	2	8.45506	333	36.0267	6.27783
Q14451	Growth factor receptor-bound protein 7 OS=Homo sapiens GN=GRB7 PE=1 SV=2 - [GRB7_HUMAN]	65.5506	23.12	1	8	8	17	1.07398e+07	0.938451	9	6.13492	532	59.6434	8.49951
P26599	Polypyrimidine tract-binding protein 1 OS=Homo sapiens GN=PTBP1 PE=1 SV=1 - [PTBP1_HUMAN]	5.70679	5.84	1	2	2	2	2.45664e+06	0.93829	2	9.50574	531	57.1856	9.17334
Q9UHD8	Septin-9 OS=Homo sapiens GN=SEPT9 PE=1 SV=2 - [SEPT9_HUMAN]	50.6435	25.26	1	10	10	18	8.36906e+06	0.937648	10	17.1327	586	65.3608	8.96826
P11166	Solute carrier family 2, facilitated glucose transporter member 1 OS=Homo sapiens GN=SLC2A1 PE=1 SV=2 - [GTR1_HUMAN]	38.6928	11.99	1	4	4	10	5.17493e+06	0.935636	4	9.84556	492	54.0485	8.71924
P22626	Heterogeneous nuclear ribonucleoproteins A2/B1 OS=Homo sapiens GN=HNRNPA2B1 PE=1 SV=2 - [ROA2_HUMAN]	53.0938	37.96	1	9	9	16	1.01033e+07	0.935555	12	9.76012	353	37.4067	8.95361
P18124	60S ribosomal protein L7 OS=Homo sapiens GN=RPL7 PE=1 SV=1 - [RL7_HUMAN]	18.7378	16.94	1	3	3	5	5.11432e+06	0.9353	3	7.32642	248	29.2072	10.6528
Q9H0U4	Ras-related protein Rab-1B OS=Homo sapiens GN=RAB1B PE=1 SV=1 - [RAB1B_HUMAN]	44.4894	26.87	13	2	4	12	1.41632e+07	0.935206	2	10.0214	201	22.1572	5.73193
Q9H7E9	UPF0488 protein C8orf33 OS=Homo sapiens GN=C8orf33 PE=1 SV=1 - [CH033_HUMAN]	10.1044	6.99	1	1	1	2	1.73597e+06	0.934624	1		229	24.9769	9.94971
Q9P0V3	SH3 domain-binding protein 4 OS=Homo sapiens GN=SH3BP4 PE=1 SV=1 - [SH3B4_HUMAN]	5.40102	2.49	1	2	2	2	746093	0.934331	2	40.3284	963	107.428	7.7085
P61204	ADP-ribosylation factor 3 OS=Homo sapiens GN=ARF3 PE=1 SV=2 - [ARF3_HUMAN]	45.3546	27.07	2	2	4	12	1.01688e+07	0.934105	2	1.1804	181	20.5877	7.43018
O00186	Syntaxin-binding protein 3 OS=Homo sapiens GN=STXBP3 PE=1 SV=2 - [STXB3_HUMAN]	40.3251	12.5	1	7	7	13	3.41675e+06	0.933977	7	7.20383	592	67.7208	7.79639
P61224	Ras-related protein Rap-1b OS=Homo sapiens GN=RAP1B PE=1 SV=1 - [RAP1B_HUMAN]	14.6134	12.5	3	2	2	4	3.64898e+06	0.932201	2	2.69313	184	20.8116	5.78271
P60709	Actin, cytoplasmic 1 OS=Homo sapiens GN=ACTB PE=1 SV=1 - [ACTB_HUMAN]	470.286	51.47	6	5	19	115	4.40405e+08	0.931034	13	3.53553	375	41.7097	5.47803
P16403	Histone H1.2 OS=Homo sapiens GN=HIST1H1C PE=1 SV=2 - [H12_HUMAN]	81.1117	17.84	5	6	6	21	1.68587e+07	0.927479	9	4.2746	213	21.3517	10.9312
P16401	Histone H1.5 OS=Homo sapiens GN=HIST1H1B PE=1 SV=3 - [H15_HUMAN]	42.292	16.37	1	5	5	12	7.98645e+06	0.92746	6	13.7528	226	22.5665	10.9165
P09651	Heterogeneous nuclear ribonucleoprotein A1 OS=Homo sapiens GN=HNRNPA1 PE=1 SV=5 - [ROA1_HUMAN]	48.3469	20.7	2	5	5	14	8.52329e+06	0.927251	7	20.2351	372	38.7231	9.12939
P00558	Phosphoglycerate kinase 1 OS=Homo sapiens GN=PGK1 PE=1 SV=3 - [PGK1_HUMAN]	98.5264	33.81	2	9	9	24	1.51109e+07	0.925716	9	13.1889	417	44.5861	8.104
P29692	Elongation factor 1-delta OS=Homo sapiens GN=EEF1D PE=1 SV=5 - [EF1D_HUMAN]	15.8025	17.44	1	3	3	5	4.31219e+06	0.925585	3	1.88543	281	31.1028	5.0083
Q14254	Flotillin-2 OS=Homo sapiens GN=FLOT2 PE=1 SV=2 - [FLOT2_HUMAN]	15.4827	8.41	1	3	3	4	1.91827e+06	0.92494	3	0.814203	428	47.0347	5.24951
P26447	Protein S100-A4 OS=Homo sapiens GN=S100A4 PE=1 SV=1 - [S10A4_HUMAN]	9.64509	10.89	1	1	1	4	6.67402e+06	0.923809	1		101	11.7207	6.11279
P62937	Peptidyl-prolyl cis-trans isomerase A OS=Homo sapiens GN=PPIA PE=1 SV=2 - [PPIA_HUMAN]	92.2251	43.64	6	8	8	28	4.68247e+07	0.92309	11	6.77272	165	18.0009	7.81104
P62829	60S ribosomal protein L23 OS=Homo sapiens GN=RPL23 PE=1 SV=1 - [RL23_HUMAN]	35.6562	25.71	1	3	3	10	1.42656e+07	0.921572	3	4.10734	140	14.8561	10.5063
P23458	Tyrosine-protein kinase JAK1 OS=Homo sapiens GN=JAK1 PE=1 SV=2 - [JAK1_HUMAN]	10.4404	3.21	1	2	2	3	268577	0.920276	2	13.6142	1154	133.191	7.54736
P09429	High mobility group protein B1 OS=Homo sapiens GN=HMGB1 PE=1 SV=3 - [HMGB1_HUMAN]	13.6326	21.86	2	3	3	4	2993202	0.920018	3	4.85959	215	24.8782	5.74463
P51114	Fragile X mental retardation syndrome-related protein 1 OS=Homo sapiens GN=FXR1 PE=1 SV=3 - [FXR1_HUMAN]	4.87519	2.25	1	1	1	2	181310	0.919939	2	0.75815	621	69.6779	6.15088
P61026	Ras-related protein Rab-10 OS=Homo sapiens GN=RAB10 PE=1 SV=1 - [RAB10_HUMAN]	52.6484	23.5	19	2	5	15	1.53732e+07	0.919535	2	4.35268	200	22.5266	8.38232
P68366	Tubulin alpha-4A chain OS=Homo sapiens GN=TUBA4A PE=1 SV=1 - [TBA4A_HUMAN]	375.05	39.96	4	3	15	96	1.73776e+08	0.919158	3	6.41265	448	49.8924	5.05908
P04083	Annexin A1 OS=Homo sapiens GN=ANXA1 PE=1 SV=2 - [ANXA1_HUMAN]	3.49456	4.34	1	1	1	1	226756	0.91791	1		346	38.69	7.02002
P52565	Rho GDP-dissociation inhibitor 1 OS=Homo sapiens GN=ARHGDIA PE=1 SV=3 - [GDIR1_HUMAN]	15.3055	7.84	1	1	1	4	1.02572e+07	0.917213	2	13.5471	204	23.1927	5.10986
Q9Y446	Plakophilin-3 OS=Homo sapiens GN=PKP3 PE=1 SV=1 - [PKP3_HUMAN]	170.49	30.36	1	16	16	42	1.27457e+07	0.916477	18	15.9433	797	87.029	9.31982
P61978	Heterogeneous nuclear ribonucleoprotein K OS=Homo sapiens GN=HNRNPK PE=1 SV=1 - [HNRPK_HUMAN]	57.2669	18.57	1	7	7	14	5.50819e+06	0.91338	7	10.5536	463	50.9444	5.5415
Q9UGT4	Sushi domain-containing protein 2 OS=Homo sapiens GN=SUSD2 PE=1 SV=1 - [SUSD2_HUMAN]	86.6291	11.07	1	5	5	18	1.01269e+07	0.912878	6	6.8653	822	90.1497	6.27783
P62424	60S ribosomal protein L7a OS=Homo sapiens GN=RPL7A PE=1 SV=2 - [RL7A_HUMAN]	14.6301	13.53	1	3	3	5	3.53752e+06	0.910843	3	3.12223	266	29.977	10.6089
Q9UDY2	Tight junction protein ZO-2 OS=Homo sapiens GN=TJP2 PE=1 SV=2 - [ZO2_HUMAN]	23.5359	5.21	1	4	4	6	2.48509e+06	0.910384	3	7.65348	1190	133.876	7.40088
P27105	Erythrocyte band 7 integral membrane protein OS=Homo sapiens GN=STOM PE=1 SV=3 - [STOM_HUMAN]	3.86363	4.17	1	1	1	1	2.04519e+06	0.909785	1		288	31.7107	7.88428
Q15758	Neutral amino acid transporter B(0) OS=Homo sapiens GN=SLC1A5 PE=1 SV=2 - [AAAT_HUMAN]	25.9309	6.84	1	3	3	7	3.50878e+06	0.907384	3	0.251796	541	56.5623	5.47803
Q96FQ6	Protein S100-A16 OS=Homo sapiens GN=S100A16 PE=1 SV=1 - [S10AG_HUMAN]	45.7041	56.31	1	4	4	11	5.33693e+06	0.907172	5	8.17526	103	11.794	6.78564
P41091	Eukaryotic translation initiation factor 2 subunit 3 OS=Homo sapiens GN=EIF2S3 PE=1 SV=3 - [IF2G_HUMAN]	2.48704	2.97	1	1	1	1	1.63798e+06	0.904261	1		472	51.0772	8.39697
P08134	Rho-related GTP-binding protein RhoC OS=Homo sapiens GN=RHOC PE=1 SV=1 - [RHOC_HUMAN]	10.3306	6.22	1	1	2	4	1.82511e+07	0.903202	1		193	21.9923	6.58057
P08865	40S ribosomal protein SA OS=Homo sapiens GN=RPSA PE=1 SV=4 - [RSSA_HUMAN]	12.6556	12.88	1	3	3	3	2.60854e+06	0.902124	3	10.1564	295	32.8334	4.86865
P62158	Calmodulin OS=Homo sapiens GN=CALM1 PE=1 SV=2 - [CALM_HUMAN]	40.7472	46.98	1	3	3	11	1.07843e+07	0.901068	7	3.78054	149	16.8268	4.22119
Q658Y4	Protein FAM91A1 OS=Homo sapiens GN=FAM91A1 PE=1 SV=3 - [F91A1_HUMAN]	0	2.27	1	1	1	1	199830	0.900602	1		838	93.8497	6.39209
P53992	Protein transport protein Sec24C OS=Homo sapiens GN=SEC24C PE=1 SV=3 - [SC24C_HUMAN]	17.6995	2.74	1	2	2	6	563466	0.900407	2	1.21096	1094	118.249	7.06396
P53621	Coatomer subunit alpha OS=Homo sapiens GN=COPA PE=1 SV=2 - [COPA_HUMAN]	7.19392	1.8	1	1	1	2	856131	0.90023	1		1224	138.258	7.66455
Q9HCY8	Protein S100-A14 OS=Homo sapiens GN=S100A14 PE=1 SV=1 - [S10AE_HUMAN]	66.5551	44.23	1	3	3	15	1.44062e+07	0.898245	5	3.54802	104	11.6548	5.23682
P06733	Alpha-enolase OS=Homo sapiens GN=ENO1 PE=1 SV=2 - [ENOA_HUMAN]	137.247	45.39	3	12	12	31	2.13007e+07	0.897817	14	8.58673	434	47.1393	7.38623
P35241	Radixin OS=Homo sapiens GN=RDX PE=1 SV=1 - [RADI_HUMAN]	328.949	41.68	2	15	23	84	8.95697e+07	0.897239	17	11.824	583	68.5214	6.3667
Q96KP4	Cytosolic non-specific dipeptidase OS=Homo sapiens GN=CNDP2 PE=1 SV=2 - [CNDP2_HUMAN]	2.87501	2.95	1	1	1	1	989025	0.892517	1		475	52.8449	5.97314
P04075	Fructose-bisphosphate aldolase A OS=Homo sapiens GN=ALDOA PE=1 SV=2 - [ALDOA_HUMAN]	128.779	40.11	1	12	12	34	2.56484e+07	0.892497	12	11.5984	364	39.3953	8.08936
Q99755	Phosphatidylinositol 4-phosphate 5-kinase type-1 alpha OS=Homo sapiens GN=PIP5K1A PE=1 SV=1 - [PI51A_HUMAN]	7.78952	6.23	2	2	2	2	2.50243e+06	0.892224	2	16.4478	562	62.5936	8.20654
O95292	Vesicle-associated membrane protein-associated protein B/C OS=Homo sapiens GN=VAPB PE=1 SV=3 - [VAPB_HUMAN]	3.88157	4.94	1	1	1	1	2.48476e+06	0.89128	1		243	27.2111	7.29834
P68104	Elongation factor 1-alpha 1 OS=Homo sapiens GN=EEF1A1 PE=1 SV=1 - [EF1A1_HUMAN]	143.216	29.65	3	10	10	37	5.40849e+07	0.884917	15	5.27617	462	50.1091	9.01221
O15143	Actin-related protein 2/3 complex subunit 1B OS=Homo sapiens GN=ARPC1B PE=1 SV=3 - [ARC1B_HUMAN]	29.5173	12.9	1	3	3	9	4.056e+06	0.882739	4	8.33225	372	40.9234	8.35303
P08754	Guanine nucleotide-binding protein G(k) subunit alpha OS=Homo sapiens GN=GNAI3 PE=1 SV=3 - [GNAI3_HUMAN]	51.4416	15.82	7	2	5	15	2.8375e+07	0.881784	2	12.8654	354	40.5063	5.69385
P46783	40S ribosomal protein S10 OS=Homo sapiens GN=RPS10 PE=1 SV=1 - [RS10_HUMAN]	6.34335	5.45	1	1	1	2	2.70182e+06	0.880291	1		165	18.8859	10.1548
Q8IZP2	Putative protein FAM10A4 OS=Homo sapiens GN=ST13P4 PE=5 SV=1 - [ST134_HUMAN]	9.78313	5.83	2	1	1	2	1.89902e+06	0.879175	1		240	27.3897	5.08447
P50895	Basal cell adhesion molecule OS=Homo sapiens GN=BCAM PE=1 SV=2 - [BCAM_HUMAN]	8.97452	5.1	1	2	2	2	2.03781e+06	0.874644	1		628	67.3626	5.80811
P26641	Elongation factor 1-gamma OS=Homo sapiens GN=EEF1G PE=1 SV=3 - [EF1G_HUMAN]	7.04055	5.26	1	2	2	2	2.19723e+06	0.874375	1		437	50.0871	6.66846
Q9HB71	Calcyclin-binding protein OS=Homo sapiens GN=CACYBP PE=1 SV=2 - [CYBP_HUMAN]	5.76431	10.53	1	1	1	1	1.85742e+06	0.874124	1		228	26.1936	8.25049
P63000	Ras-related C3 botulinum toxin substrate 1 OS=Homo sapiens GN=RAC1 PE=1 SV=1 - [RAC1_HUMAN]	21.4407	16.15	3	3	3	7	1.21749e+07	0.873776	4	4.07157	192	21.4362	8.49951
P09525	Annexin A4 OS=Homo sapiens GN=ANXA4 PE=1 SV=4 - [ANXA4_HUMAN]	37.8607	23.2	1	5	5	10	3.50933e+06	0.873713	4	10.4065	319	35.8601	6.12549
P62314	Small nuclear ribonucleoprotein Sm D1 OS=Homo sapiens GN=SNRPD1 PE=1 SV=1 - [SMD1_HUMAN]	2.73172	16.81	1	1	1	1	150673	0.873179	1		119	13.2734	11.561
Q01970	1-phosphatidylinositol 4,5-bisphosphate phosphodiesterase beta-3 OS=Homo sapiens GN=PLCB3 PE=1 SV=2 - [PLCB3_HUMAN]	65.8717	12.8	1	10	10	19	4.56576e+06	0.872698	9	6.03767	1234	138.713	5.89697
Q99584	Protein S100-A13 OS=Homo sapiens GN=S100A13 PE=1 SV=1 - [S10AD_HUMAN]	2.29474	12.24	1	1	1	1	1.94694e+06	0.869447	1		98	11.4641	6.16357
P06703	Protein S100-A6 OS=Homo sapiens GN=S100A6 PE=1 SV=1 - [S10A6_HUMAN]	14.035	16.67	1	2	2	5	1.27063e+07	0.867857	2	17.5809	90	10.1733	5.47803
Q00839	Heterogeneous nuclear ribonucleoprotein U OS=Homo sapiens GN=HNRNPU PE=1 SV=6 - [HNRPU_HUMAN]	38.3019	8	1	4	4	9	4.76596e+06	0.867748	5	24.8391	825	90.528	5.99854
Q9H4M9	EH domain-containing protein 1 OS=Homo sapiens GN=EHD1 PE=1 SV=2 - [EHD1_HUMAN]	18.3309	12.17	2	4	4	6	2.46474e+06	0.867351	3	5.87475	534	60.5887	6.82959
Q9BST9	Rhotekin OS=Homo sapiens GN=RTKN PE=1 SV=2 - [RTKN_HUMAN]	16.2713	9.59	1	3	3	5	2.37416e+06	0.866363	3	1.53171	563	62.6277	7.44482
P51148	Ras-related protein Rab-5C OS=Homo sapiens GN=RAB5C PE=1 SV=2 - [RAB5C_HUMAN]	61.5829	43.52	3	6	6	14	1.54446e+07	0.864341	8	4.82839	216	23.4678	8.41162
P62280	40S ribosomal protein S11 OS=Homo sapiens GN=RPS11 PE=1 SV=3 - [RS11_HUMAN]	14.1687	6.96	1	1	1	5	3.90542e+06	0.863733	2	8.41258	158	18.419	10.3013
P51991	Heterogeneous nuclear ribonucleoprotein A3 OS=Homo sapiens GN=HNRNPA3 PE=1 SV=2 - [ROA3_HUMAN]	5.87508	8.73	1	1	2	2	4.31808e+06	0.863669	1		378	39.5706	9.01221
P07900	Heat shock protein HSP 90-alpha OS=Homo sapiens GN=HSP90AA1 PE=1 SV=5 - [HS90A_HUMAN]	243.678	31.42	7	12	21	67	3.69684e+07	0.863338	11	7.56084	732	84.6067	5.021
P32322	Pyrroline-5-carboxylate reductase 1, mitochondrial OS=Homo sapiens GN=PYCR1 PE=1 SV=2 - [P5CR1_HUMAN]	11.6469	8.46	1	2	2	3	3.84015e+06	0.862794	2	1.40496	319	33.3396	7.60596
Q96FZ7	Charged multivesicular body protein 6 OS=Homo sapiens GN=CHMP6 PE=1 SV=3 - [CHMP6_HUMAN]	4.84376	6.47	1	1	1	1	2.215e+06	0.861354	1		201	23.4703	5.31299
P14866	Heterogeneous nuclear ribonucleoprotein L OS=Homo sapiens GN=HNRNPL PE=1 SV=2 - [HNRPL_HUMAN]	4.18398	3.06	1	1	1	1	3.73032e+06	0.859606	1		589	64.0924	8.22119
Q16543	Hsp90 co-chaperone Cdc37 OS=Homo sapiens GN=CDC37 PE=1 SV=1 - [CDC37_HUMAN]	78.4842	36.77	1	11	11	22	1.6565e+07	0.858275	12	5.21576	378	44.44	5.24951
P61966	AP-1 complex subunit sigma-1A OS=Homo sapiens GN=AP1S1 PE=1 SV=1 - [AP1S1_HUMAN]	3.87857	10.13	1	1	1	1	588422	0.856017	1		158	18.7206	5.73193
P62826	GTP-binding nuclear protein Ran OS=Homo sapiens GN=RAN PE=1 SV=3 - [RAN_HUMAN]	17.5304	16.67	1	3	3	6	7.75663e+06	0.854122	3	9.26045	216	24.4076	7.48877
Q9H3G5	Probable serine carboxypeptidase CPVL OS=Homo sapiens GN=CPVL PE=1 SV=2 - [CPVL_HUMAN]	5.03322	1.68	1	1	1	2	2.40899e+06	0.851219	1		476	54.1291	5.61768
P52272	Heterogeneous nuclear ribonucleoprotein M OS=Homo sapiens GN=HNRNPM PE=1 SV=3 - [HNRPM_HUMAN]	8.68656	6.16	1	3	3	3	1.83996e+06	0.850857	3	45.3425	730	77.4643	8.70459
P68371	Tubulin beta-4B chain OS=Homo sapiens GN=TUBB4B PE=1 SV=1 - [TBB4B_HUMAN]	496.772	51.46	5	5	21	126	1.20496e+08	0.850746	10	8.0967	445	49.799	4.89404
Q9Y6E2	Basic leucine zipper and W2 domain-containing protein 2 OS=Homo sapiens GN=BZW2 PE=1 SV=1 - [BZW2_HUMAN]	6.04269	2.15	1	1	1	2	1.90415e+06	0.849448	1		419	48.132	6.68311
P14618	Pyruvate kinase PKM OS=Homo sapiens GN=PKM PE=1 SV=4 - [KPYM_HUMAN]	106.649	33.33	2	14	14	31	1.27091e+07	0.849067	15	7.79488	531	57.9	7.84033
Q9NTK5	Obg-like ATPase 1 OS=Homo sapiens GN=OLA1 PE=1 SV=2 - [OLA1_HUMAN]	14.4616	3.79	1	1	1	3	981698	0.848631	1		396	44.7153	7.81104
P68363	Tubulin alpha-1B chain OS=Homo sapiens GN=TUBA1B PE=1 SV=1 - [TBA1B_HUMAN]	475.884	51.66	8	8	20	120	2.08686e+08	0.84815	11	4.19285	451	50.1196	5.05908
P11940	Polyadenylate-binding protein 1 OS=Homo sapiens GN=PABPC1 PE=1 SV=2 - [PABP1_HUMAN]	8.61357	4.56	3	3	3	3	1.97795e+06	0.847006	3	27.0882	636	70.6259	9.49561
P07437	Tubulin beta chain OS=Homo sapiens GN=TUBB PE=1 SV=2 - [TBB5_HUMAN]	526.577	51.58	4	6	22	131	1.48801e+08	0.845598	11	8.70172	444	49.639	4.89404
Q9P2J5	Leucine--tRNA ligase, cytoplasmic OS=Homo sapiens GN=LARS PE=1 SV=2 - [SYLC_HUMAN]	8.83422	4.08	1	2	2	3	1.28201e+06	0.844548	2	12.2719	1176	134.379	7.29834
P30044	Peroxiredoxin-5, mitochondrial OS=Homo sapiens GN=PRDX5 PE=1 SV=4 - [PRDX5_HUMAN]	6.41512	13.08	1	2	2	2	1.15853e+06	0.843204	2	2.02834	214	22.0725	8.70459
P42167	Lamina-associated polypeptide 2, isoforms beta/gamma OS=Homo sapiens GN=TMPO PE=1 SV=2 - [LAP2B_HUMAN]	3.08992	2.86	2	1	1	1	1.07386e+06	0.841354	1		454	50.6395	9.37842
Q00325	Phosphate carrier protein, mitochondrial OS=Homo sapiens GN=SLC25A3 PE=1 SV=2 - [MPCP_HUMAN]	10.2026	3.31	1	1	1	3	1.79151e+06	0.839076	1		362	40.0687	9.37842
Q14344	Guanine nucleotide-binding protein subunit alpha-13 OS=Homo sapiens GN=GNA13 PE=1 SV=2 - [GNA13_HUMAN]	23.4121	9.28	5	2	3	7	2.45765e+07	0.837469	2	24.0981	377	44.0217	8.00146
O00429	Dynamin-1-like protein OS=Homo sapiens GN=DNM1L PE=1 SV=2 - [DNM1L_HUMAN]	10.4957	6.39	1	3	3	3	490220	0.834281	3	3.3442	736	81.8261	6.81494
P19105	Myosin regulatory light chain 12A OS=Homo sapiens GN=MYL12A PE=1 SV=2 - [ML12A_HUMAN]	8.89937	17.54	2	2	2	2	4.70242e+06	0.832347	2	21.5406	171	19.7815	4.80518
P61586	Transforming protein RhoA OS=Homo sapiens GN=RHOA PE=1 SV=1 - [RHOA_HUMAN]	18.0213	22.8	1	2	3	6	1.17937e+07	0.832267	2	14.7835	193	21.7541	6.1001
P10809	60 kDa heat shock protein, mitochondrial OS=Homo sapiens GN=HSPD1 PE=1 SV=2 - [CH60_HUMAN]	6.18895	3.66	1	1	1	2	388791	0.832174	1		573	61.0164	5.87158
Q6P2Q9	Pre-mRNA-processing-splicing factor 8 OS=Homo sapiens GN=PRPF8 PE=1 SV=2 - [PRP8_HUMAN]	2.58293	0.86	1	1	1	1	151386	0.831699	1		2335	273.427	8.83643
Q9P265	Disco-interacting protein 2 homolog B OS=Homo sapiens GN=DIP2B PE=1 SV=3 - [DIP2B_HUMAN]	3.26426	1.14	1	1	1	1	1.32348e+06	0.83032	1		1576	171.382	8.08936
O15427	Monocarboxylate transporter 4 OS=Homo sapiens GN=SLC16A3 PE=1 SV=1 - [MOT4_HUMAN]	5.2718	2.8	1	1	1	2	3.62135e+06	0.830253	1		465	49.4369	7.95752
P58546	Myotrophin OS=Homo sapiens GN=MTPN PE=1 SV=2 - [MTPN_HUMAN]	4.38495	14.41	1	1	1	1	1.31665e+06	0.829218	1		118	12.8866	5.51611
P55327	Tumor protein D52 OS=Homo sapiens GN=TPD52 PE=1 SV=2 - [TPD52_HUMAN]	10.0039	6.25	1	1	1	2	5.54749e+06	0.8272	1		224	24.3122	4.83057
Q15843	NEDD8 OS=Homo sapiens GN=NEDD8 PE=1 SV=1 - [NEDD8_HUMAN]	2.31384	17.28	1	1	1	1	2.41527e+06	0.823847	1		81	9.06595	8.42627
P08238	Heat shock protein HSP 90-beta OS=Homo sapiens GN=HSP90AB1 PE=1 SV=4 - [HS90B_HUMAN]	296.773	33.01	7	11	22	85	3.75902e+07	0.821616	15	6.97303	724	83.2121	5.03369
Q96QK1	Vacuolar protein sorting-associated protein 35 OS=Homo sapiens GN=VPS35 PE=1 SV=2 - [VPS35_HUMAN]	25.3247	4.9	1	3	3	7	3.25529e+06	0.821093	3	1.77788	796	91.6489	5.49072
Q04721	Neurogenic locus notch homolog protein 2 OS=Homo sapiens GN=NOTCH2 PE=1 SV=3 - [NOTC2_HUMAN]	2.90513	0.93	2	2	2	2	1.7169e+06	0.819592	2	15.71	2471	265.226	5.13525
Q5VW32	BRO1 domain-containing protein BROX OS=Homo sapiens GN=BROX PE=1 SV=1 - [BROX_HUMAN]	7.33379	8.76	1	2	2	2	938367	0.818979	2	3.96244	411	46.4467	7.6499
O14979	Heterogeneous nuclear ribonucleoprotein D-like OS=Homo sapiens GN=HNRNPDL PE=1 SV=3 - [HNRDL_HUMAN]	2.80252	1.9	1	1	1	1	1.02755e+06	0.817191	1		420	46.4091	9.56885
P32119	Peroxiredoxin-2 OS=Homo sapiens GN=PRDX2 PE=1 SV=5 - [PRDX2_HUMAN]	8.20354	9.6	1	1	2	3	6.33946e+06	0.81667	1		198	21.8782	5.97314
O60361	Putative nucleoside diphosphate kinase OS=Homo sapiens GN=NME2P1 PE=5 SV=1 - [NDK8_HUMAN]	5.80771	12.41	3	1	1	2	1.08945e+07	0.811098	1		137	15.519	8.57275
Q96AE4	Far upstream element-binding protein 1 OS=Homo sapiens GN=FUBP1 PE=1 SV=3 - [FUBP1_HUMAN]	6.78115	2.02	1	1	1	2	1.82558e+06	0.807645	1		644	67.5185	7.60596
P62888	60S ribosomal protein L30 OS=Homo sapiens GN=RPL30 PE=1 SV=2 - [RL30_HUMAN]	8.12803	10.43	1	1	1	2	1.79018e+06	0.805287	1		115	12.7757	9.62744
Q9Y6M7	Sodium bicarbonate cotransporter 3 OS=Homo sapiens GN=SLC4A7 PE=1 SV=2 - [S4A7_HUMAN]	2.18032	1.4	1	1	1	1	1.7036e+06	0.802507	1		1214	135.957	6.7124
P50395	Rab GDP dissociation inhibitor beta OS=Homo sapiens GN=GDI2 PE=1 SV=2 - [GDIB_HUMAN]	153.942	31.46	2	13	13	42	1.23395e+07	0.801685	15	8.90461	445	50.6309	6.46826
Q86VI3	Ras GTPase-activating-like protein IQGAP3 OS=Homo sapiens GN=IQGAP3 PE=1 SV=2 - [IQGA3_HUMAN]	8.99694	2.27	2	1	2	3	3.08243e+06	0.801023	1		1631	184.584	7.6499
Q9UQ80	Proliferation-associated protein 2G4 OS=Homo sapiens GN=PA2G4 PE=1 SV=3 - [PA2G4_HUMAN]	8.65381	8.88	1	2	2	2	3.1253e+06	0.795545	1		394	43.7592	6.55127
O00571	ATP-dependent RNA helicase DDX3X OS=Homo sapiens GN=DDX3X PE=1 SV=3 - [DDX3X_HUMAN]	18.3807	9.37	2	4	4	7	1.19893e+06	0.794048	3	4.73117	662	73.198	7.18115
Q9UKM9	RNA-binding protein Raly OS=Homo sapiens GN=RALY PE=1 SV=1 - [RALY_HUMAN]	2.50224	6.86	1	1	1	1	2.09886e+06	0.786291	1		306	32.4436	9.17334
Q12846	Syntaxin-4 OS=Homo sapiens GN=STX4 PE=1 SV=2 - [STX4_HUMAN]	11.7024	13.13	1	3	3	3	2.39054e+06	0.780415	3	2.27008	297	34.1589	6.27783
O94804	Serine/threonine-protein kinase 10 OS=Homo sapiens GN=STK10 PE=1 SV=1 - [STK10_HUMAN]	17.9851	4.96	1	2	3	5	2.85513e+06	0.779997	3	8.91316	968	112.065	6.94678
Q9H444	Charged multivesicular body protein 4b OS=Homo sapiens GN=CHMP4B PE=1 SV=1 - [CHM4B_HUMAN]	9.77083	6.25	1	1	1	2	2.81904e+06	0.776999	1		224	24.9346	4.81787
Q9Y365	PCTP-like protein OS=Homo sapiens GN=STARD10 PE=1 SV=2 - [PCTL_HUMAN]	25.541	20.96	1	4	4	7	1.45121e+07	0.77501	5	2.0074	291	33.0276	7.12256
P15311	Ezrin OS=Homo sapiens GN=EZR PE=1 SV=4 - [EZRI_HUMAN]	487.858	44.2	3	20	28	124	1.00217e+08	0.773074	26	4.66507	586	69.3697	6.26514
Q15181	Inorganic pyrophosphatase OS=Homo sapiens GN=PPA1 PE=1 SV=2 - [IPYR_HUMAN]	4.82782	7.61	1	1	1	1	1.23388e+06	0.767944	1		289	32.6392	5.85889
Q8TF74	WAS/WASL-interacting protein family member 2 OS=Homo sapiens GN=WIPF2 PE=1 SV=1 - [WIPF2_HUMAN]	2.58159	3.64	1	1	1	1	2.52731e+06	0.753822	1		440	46.2602	10.9312
P60953	Cell division control protein 42 homolog OS=Homo sapiens GN=CDC42 PE=1 SV=2 - [CDC42_HUMAN]	30.8624	19.9	1	2	2	7	5.12976e+06	0.749051	2	36.4482	191	21.245	6.55127
Q92945	Far upstream element-binding protein 2 OS=Homo sapiens GN=KHSRP PE=1 SV=4 - [FUBP2_HUMAN]	3.36317	1.83	1	1	1	1	865371	0.748784	1		711	73.07	7.29834
P62191	26S protease regulatory subunit 4 OS=Homo sapiens GN=PSMC1 PE=1 SV=1 - [PRS4_HUMAN]	12.7104	8.41	3	3	3	4	2.62188e+06	0.742961	2	2.95801	440	49.1537	6.21436
Q9H2G2	STE20-like serine/threonine-protein kinase OS=Homo sapiens GN=SLK PE=1 SV=1 - [SLK_HUMAN]	17.5707	5.99	1	3	4	5	3.034e+06	0.740195	3	11.217	1235	142.607	5.14795
Q96L92	Sorting nexin-27 OS=Homo sapiens GN=SNX27 PE=1 SV=2 - [SNX27_HUMAN]	5.78978	4.25	1	1	1	2	473422	0.736693	1		541	61.2265	6.49365
P47756	F-actin-capping protein subunit beta OS=Homo sapiens GN=CAPZB PE=1 SV=4 - [CAPZB_HUMAN]	3.10281	5.05	1	1	1	1	2.15539e+06	0.724319	1		277	31.3308	5.59229
P14625	Endoplasmin OS=Homo sapiens GN=HSP90B1 PE=1 SV=1 - [ENPL_HUMAN]	38.4878	9.34	1	4	6	12	9.48457e+06	0.723062	5	14.3974	803	92.4113	4.84326
O14745	Na(+)/H(+) exchange regulatory cofactor NHE-RF1 OS=Homo sapiens GN=SLC9A3R1 PE=1 SV=4 - [NHRF1_HUMAN]	61.7215	29.61	1	7	7	16	1.99219e+07	0.72263	7	8.67288	358	38.8446	5.77002
P51149	Ras-related protein Rab-7a OS=Homo sapiens GN=RAB7A PE=1 SV=1 - [RAB7A_HUMAN]	6.17147	10.14	1	2	2	2	2.39137e+06	0.721254	2	11.3361	207	23.4748	6.69775
Q8WUY1	Protein THEM6 OS=Homo sapiens GN=THEM6 PE=1 SV=2 - [THEM6_HUMAN]	2.61531	3.85	1	1	1	1	1.70184e+06	0.719296	1		208	23.8499	9.5542
P62491	Ras-related protein Rab-11A OS=Homo sapiens GN=RAB11A PE=1 SV=3 - [RB11A_HUMAN]	5.21976	5.09	2	1	1	2	3.99596e+06	0.713216	1		216	24.3784	6.56592
P61106	Ras-related protein Rab-14 OS=Homo sapiens GN=RAB14 PE=1 SV=4 - [RAB14_HUMAN]	34.766	26.98	16	2	4	9	1.16286e+07	0.709936	2	1.97743	215	23.8819	6.21436
Q8IZP0	Abl interactor 1 OS=Homo sapiens GN=ABI1 PE=1 SV=4 - [ABI1_HUMAN]	15.7428	3.15	1	1	1	3	5.43114e+06	0.708249	1		508	55.0467	7.06396
P48729	Casein kinase I isoform alpha OS=Homo sapiens GN=CSNK1A1 PE=1 SV=2 - [KC1A_HUMAN]	5.1659	6.53	2	2	2	2	753795	0.702896	1		337	38.8899	9.56885
Q10567	AP-1 complex subunit beta-1 OS=Homo sapiens GN=AP1B1 PE=1 SV=2 - [AP1B1_HUMAN]	5.39403	3.06	1	1	2	3	1.04551e+06	0.698164	1		949	104.57	5.05908
P62258	14-3-3 protein epsilon OS=Homo sapiens GN=YWHAE PE=1 SV=1 - [1433E_HUMAN]	37.9591	25.1	1	4	6	12	5.38899e+06	0.676557	2	15.4077	255	29.1554	4.7417
P00533	Epidermal growth factor receptor OS=Homo sapiens GN=EGFR PE=1 SV=2 - [EGFR_HUMAN]	57.7286	5.04	1	4	5	15	3.34963e+08	0.670506	4	5.04556	1210	134.19	6.68311
Q16513	Serine/threonine-protein kinase N2 OS=Homo sapiens GN=PKN2 PE=1 SV=1 - [PKN2_HUMAN]	4.34798	1.63	1	1	1	1	387630	0.658076	1		984	111.964	6.30322
Q8N4C8	Misshapen-like kinase 1 OS=Homo sapiens GN=MINK1 PE=1 SV=2 - [MINK1_HUMAN]	11.0847	2.85	1	2	2	3	1.98866e+06	0.652148	2	9.02396	1332	149.729	7.85498
Q9H009	Nascent polypeptide-associated complex subunit alpha-2 OS=Homo sapiens GN=NACA2 PE=1 SV=1 - [NACA2_HUMAN]	5.52722	6.98	1	1	1	2	2.00444e+06	0.616445	1		215	23.2088	4.729
P61081	NEDD8-conjugating enzyme Ubc12 OS=Homo sapiens GN=UBE2M PE=1 SV=1 - [UBC12_HUMAN]	3.21091	4.37	1	1	1	1	2.93079e+06	0.61466	1		183	20.8866	7.69385
P31146	Coronin-1A OS=Homo sapiens GN=CORO1A PE=1 SV=4 - [COR1A_HUMAN]	6.70251	2.17	1	1	1	2	1.01309e+06	0.614229	1		461	50.9938	6.68311
Q9ULC4	Malignant T-cell-amplified sequence 1 OS=Homo sapiens GN=MCTS1 PE=1 SV=1 - [MCTS1_HUMAN]	7.40307	20.44	1	2	2	2	226060	0.604515	1		181	20.5418	8.82178
Q0VAA5	PI-PLC X domain-containing protein 2 OS=Homo sapiens GN=PLCXD2 PE=2 SV=1 - [PLCX2_HUMAN]	6.08328	2.62	1	1	1	2	3.68445e+06	0.59258	1		305	34.755	9.43701
O75363	Breast carcinoma-amplified sequence 1 OS=Homo sapiens GN=BCAS1 PE=1 SV=2 - [BCAS1_HUMAN]	8.44694	7.53	1	2	2	2	1.28452e+06	0.592569	1		584	61.6715	5.09717
P31942	Heterogeneous nuclear ribonucleoprotein H3 OS=Homo sapiens GN=HNRNPH3 PE=1 SV=2 - [HNRH3_HUMAN]	4.04509	3.47	1	1	1	1	863489	0.590167	1		346	36.9031	6.87354
Q9UG63	ATP-binding cassette sub-family F member 2 OS=Homo sapiens GN=ABCF2 PE=1 SV=2 - [ABCF2_HUMAN]	3.38815	1.77	1	1	1	1	692567	0.584179	1		623	71.2446	7.37158
P51858	Hepatoma-derived growth factor OS=Homo sapiens GN=HDGF PE=1 SV=1 - [HDGF_HUMAN]	2.72447	4.17	1	1	1	1	1.53383e+06	0.554965	1		240	26.7719	4.729
P62745	Rho-related GTP-binding protein RhoB OS=Homo sapiens GN=RHOB PE=1 SV=1 - [RHOB_HUMAN]	7.79038	4.08	1	1	1	3	4.88359e+06	0.545015	1		196	22.1091	5.23682
P14923	Junction plakoglobin OS=Homo sapiens GN=JUP PE=1 SV=3 - [PLAK_HUMAN]	14.1126	7.11	1	4	4	5	2.30285e+06	0.526275	4	7.08158	745	81.6927	6.13818
Q9C0B5	Palmitoyltransferase ZDHHC5 OS=Homo sapiens GN=ZDHHC5 PE=1 SV=2 - [ZDHC5_HUMAN]	3.94105	2.24	1	1	1	1	1.54224e+06	0.521072	1		715	77.4961	9.01221
Q99615	DnaJ homolog subfamily C member 7 OS=Homo sapiens GN=DNAJC7 PE=1 SV=2 - [DNJC7_HUMAN]	3.71071	2.43	1	1	1	1	1.82575e+06	0.508146	1		494	56.4047	6.96143
P00966	Argininosuccinate synthase OS=Homo sapiens GN=ASS1 PE=1 SV=2 - [ASSY_HUMAN]	4.06896	4.85	1	1	1	1	1.02955e+06	0.463441	1		412	46.501	8.01611
Q9UN19	Dual adapter for phosphotyrosine and 3-phosphotyrosine and 3-phosphoinositide OS=Homo sapiens GN=DAPP1 PE=1 SV=1 - [DAPP1_HUMAN]	2.96777	4.29	1	1	1	1	1.64519e+06	0.397444	1		280	32.1732	7.79639
Q53GA4	Pleckstrin homology-like domain family A member 2 OS=Homo sapiens GN=PHLDA2 PE=1 SV=2 - [PHLA2_HUMAN]	5.43883	11.84	1	2	2	2	2.49938e+06	0.383812	1		152	17.0818	9.17334
Q9Y4P3	Transducin beta-like protein 2 OS=Homo sapiens GN=TBL2 PE=1 SV=1 - [TBL2_HUMAN]	4.21547	2.91	1	1	1	1	5.80096e+06	0.215788	1		447	49.7662	9.43701
P02533	Keratin, type I cytoskeletal 14 OS=Homo sapiens GN=KRT14 PE=1 SV=4 - [K1C14_HUMAN]	29.7991	12.92	13	2	7	10	1.97508e+07	0.0900425	1		472	51.5294	5.16064
P11171	Protein 4.1 OS=Homo sapiens GN=EPB41 PE=1 SV=4 - [41_HUMAN]	5.56993	1.74	1	1	1	2	2.06525e+07				864	96.9573	5.57959
Q9BZC7	ATP-binding cassette sub-family A member 2 OS=Homo sapiens GN=ABCA2 PE=1 SV=3 - [ABCA2_HUMAN]	2.70255	0.45	1	1	1	1	5.47432e+06				2435	269.701	6.81494
Q562R1	Beta-actin-like protein 2 OS=Homo sapiens GN=ACTBL2 PE=1 SV=2 - [ACTBL_HUMAN]	96.191	15.69	1	1	5	27	3.19995e+08				376	41.976	5.59229
P02768	Serum albumin OS=Homo sapiens GN=ALB PE=1 SV=2 - [ALBU_HUMAN]	14.7558	2.46	1	1	1	3	5.74101e+07				609	69.3215	6.27783
P09972	Fructose-bisphosphate aldolase C OS=Homo sapiens GN=ALDOC PE=1 SV=2 - [ALDOC_HUMAN]	41.0187	7.14	1	1	2	7	5.09236e+06				364	39.4312	6.87354
Q96NW4	Ankyrin repeat domain-containing protein 27 OS=Homo sapiens GN=ANKRD27 PE=1 SV=2 - [ANR27_HUMAN]	0	3.05	1	1	1	1	30460.2				1050	116.91	6.87354
Q9Y6B7	AP-4 complex subunit beta-1 OS=Homo sapiens GN=AP4B1 PE=1 SV=2 - [AP4B1_HUMAN]	0	2.3	1	1	1	1					739	83.2057	5.85889
P84085	ADP-ribosylation factor 5 OS=Homo sapiens GN=ARF5 PE=1 SV=2 - [ARF5_HUMAN]	28.0747	27.22	1	1	3	7	9.02327e+06				180	20.5166	6.78564
P02747	Complement C1q subcomponent subunit C OS=Homo sapiens GN=C1QC PE=1 SV=3 - [C1QC_HUMAN]	4.10851	7.35	1	1	1	1	7.65652e+06				245	25.7571	8.41162
Q9BXF3	Cat eye syndrome critical region protein 2 OS=Homo sapiens GN=CECR2 PE=1 SV=2 - [CECR2_HUMAN]	2.06912	1.21	1	1	1	1					1484	164.109	6.97607
O00299	Chloride intracellular channel protein 1 OS=Homo sapiens GN=CLIC1 PE=1 SV=4 - [CLIC1_HUMAN]	3.78909	4.98	1	1	1	1	1.18481e+06				241	26.9057	5.17334
P02452	Collagen alpha-1(I) chain OS=Homo sapiens GN=COL1A1 PE=1 SV=5 - [CO1A1_HUMAN]	2.38669	0.61	1	1	1	1	3.44477e+06				1464	138.857	5.79541
P05997	Collagen alpha-2(V) chain OS=Homo sapiens GN=COL5A2 PE=1 SV=3 - [CO5A2_HUMAN]	2.28065	1	1	1	1	1					1499	144.821	6.45557
Q53SF7	Cordon-bleu protein-like 1 OS=Homo sapiens GN=COBLL1 PE=1 SV=2 - [COBL1_HUMAN]	3.22979	1.08	1	1	1	1	2.25461e+07				1204	131.705	6.66846
P17844	Probable ATP-dependent RNA helicase DDX5 OS=Homo sapiens GN=DDX5 PE=1 SV=1 - [DDX5_HUMAN]	6.41849	3.75	1	2	2	2	1981509				614	69.1047	8.92432
O43143	Pre-mRNA-splicing factor ATP-dependent RNA helicase DHX15 OS=Homo sapiens GN=DHX15 PE=1 SV=2 - [DHX15_HUMAN]	3.88472	1.51	1	1	1	1	595532				795	90.8752	7.45947
P25685	DnaJ homolog subfamily B member 1 OS=Homo sapiens GN=DNAJB1 PE=1 SV=4 - [DNJB1_HUMAN]	4.9062	2.65	1	1	1	2	1.40626e+06				340	38.0204	8.63135
Q13474	Dystrophin-related protein 2 OS=Homo sapiens GN=DRP2 PE=2 SV=2 - [DRP2_HUMAN]	5.37657	0.84	1	1	1	2	8.72088e+07				957	107.894	6.22705
O00148	ATP-dependent RNA helicase DDX39A OS=Homo sapiens GN=DDX39A PE=1 SV=2 - [DX39A_HUMAN]	0	2.34	2	1	1	1	308999				427	49.098	5.68115
Q92630	Dual specificity tyrosine-phosphorylation-regulated kinase 2 OS=Homo sapiens GN=DYRK2 PE=1 SV=3 - [DYRK2_HUMAN]	2.81385	2.33	1	1	1	1	4.69507e+06				601	66.6094	9.67139
O75955	Flotillin-1 OS=Homo sapiens GN=FLOT1 PE=1 SV=3 - [FLOT1_HUMAN]	4.24374	4.45	1	1	1	1	286761				427	47.3256	7.48877
P63244	Guanine nucleotide-binding protein subunit beta-2-like 1 OS=Homo sapiens GN=GNB2L1 PE=1 SV=3 - [GBLP_HUMAN]	10.7472	7.57	1	2	2	3	2.73982e+06				317	35.0546	7.69385
Q06210	Glutamine--fructose-6-phosphate aminotransferase [isomerizing] 1 OS=Homo sapiens GN=GFPT1 PE=1 SV=3 - [GFPT1_HUMAN]	3.38137	1.86	1	1	1	1	2.49837e+06				699	78.7563	7.10791
Q13442	28 kDa heat- and acid-stable phosphoprotein OS=Homo sapiens GN=PDAP1 PE=1 SV=1 - [HAP28_HUMAN]	3.45076	7.73	1	1	1	1	201864				181	20.6176	8.86572
P42858	Huntingtin OS=Homo sapiens GN=HTT PE=1 SV=2 - [HD_HUMAN]	0	0.76	1	1	1	1	528586				3142	347.383	6.20166
O60506	Heterogeneous nuclear ribonucleoprotein Q OS=Homo sapiens GN=SYNCRIP PE=1 SV=2 - [HNRPQ_HUMAN]	3.81299	1.93	2	1	1	1	1.03139e+06				623	69.5596	8.5874
Q9P2D0	Inhibitor of Bruton tyrosine kinase OS=Homo sapiens GN=IBTK PE=1 SV=3 - [IBTK_HUMAN]	4.90388	0.67	1	1	1	2	4.69987e+06				1353	150.432	7.7085
P01859	Ig gamma-2 chain C region OS=Homo sapiens GN=IGHG2 PE=1 SV=2 - [IGHG2_HUMAN]	4.68218	2.15	4	1	1	2	8.11521e+07				326	35.8778	7.59131
O60674	Tyrosine-protein kinase JAK2 OS=Homo sapiens GN=JAK2 PE=1 SV=2 - [JAK2_HUMAN]	0	1.94	1	1	1	3	5.2505e+06				1132	130.59	7.21045
P13645	Keratin, type I cytoskeletal 10 OS=Homo sapiens GN=KRT10 PE=1 SV=6 - [K1C10_HUMAN]	103.433	37.5	13	15	19	30	3.33903e+07				584	58.7917	5.21143
P35527	Keratin, type I cytoskeletal 9 OS=Homo sapiens GN=KRT9 PE=1 SV=3 - [K1C9_HUMAN]	58.4126	19.74	1	7	8	14	1.29428e+07				623	62.0268	5.23682
P35908	Keratin, type II cytoskeletal 2 epidermal OS=Homo sapiens GN=KRT2 PE=1 SV=2 - [K22E_HUMAN]	97.7851	22.38	8	9	14	27	4.22163e+07				639	65.3932	8.00146
P04264	Keratin, type II cytoskeletal 1 OS=Homo sapiens GN=KRT1 PE=1 SV=6 - [K2C1_HUMAN]	138.325	42.39	1	21	23	37	4.26047e+07				644	65.999	8.11865
Q5XKE5	Keratin, type II cytoskeletal 79 OS=Homo sapiens GN=KRT79 PE=1 SV=2 - [K2C79_HUMAN]	43.6246	10.65	7	1	6	16	3.26942e+07				535	57.8002	7.1958
O00515	Ladinin-1 OS=Homo sapiens GN=LAD1 PE=1 SV=2 - [LAD1_HUMAN]	2.68572	4.64	1	1	1	1	1.40787e+06				517	57.0968	9.67139
P55268	Laminin subunit beta-2 OS=Homo sapiens GN=LAMB2 PE=1 SV=2 - [LAMB2_HUMAN]	0	2.28	1	1	1	2					1798	195.854	6.52197
Q9HCJ2	Leucine-rich repeat-containing protein 4C OS=Homo sapiens GN=LRRC4C PE=1 SV=1 - [LRC4C_HUMAN]	2.61937	4.22	1	1	1	1	1.93705e+07				640	71.9037	7.15186
O94832	Unconventional myosin-Id OS=Homo sapiens GN=MYO1D PE=1 SV=2 - [MYO1D_HUMAN]	3.08767	1.19	1	1	1	1	143930				1006	116.129	9.39307
Q5VU43	Myomegalin OS=Homo sapiens GN=PDE4DIP PE=1 SV=1 - [MYOME_HUMAN]	3.05832	1.07	1	1	1	1	1.11064e+06				2346	264.918	5.43994
Q9Y2I6	Ninein-like protein OS=Homo sapiens GN=NINL PE=1 SV=2 - [NINL_HUMAN]	7.7621	0.58	1	1	1	3	9.40124e+07				1382	156.248	5.05908
Q8NF37	Lysophosphatidylcholine acyltransferase 1 OS=Homo sapiens GN=LPCAT1 PE=1 SV=2 - [PCAT1_HUMAN]	3.16442	2.81	1	1	1	1	127584				534	59.1134	6.02393
Q15084	Protein disulfide-isomerase A6 OS=Homo sapiens GN=PDIA6 PE=1 SV=1 - [PDIA6_HUMAN]	3.31743	5.68	1	1	1	1	731777				440	48.0913	5.08447
P13797	Plastin-3 OS=Homo sapiens GN=PLS3 PE=1 SV=4 - [PLST_HUMAN]	0	4.44	1	1	1	1	263630				630	70.7662	5.60498
P0CG38	POTE ankyrin domain family member I OS=Homo sapiens GN=POTEI PE=3 SV=1 - [POTEI_HUMAN]	95.5652	6.42	2	1	6	29	1.36322e+08				1075	121.205	6.21436
P18031	Tyrosine-protein phosphatase non-receptor type 1 OS=Homo sapiens GN=PTPN1 PE=1 SV=1 - [PTN1_HUMAN]	2.31921	2.07	1	1	1	1	1.1163e+06				435	49.9348	6.26514
P59190	Ras-related protein Rab-15 OS=Homo sapiens GN=RAB15 PE=1 SV=1 - [RAB15_HUMAN]	30.7957	17.45	12	1	3	9	1.88038e+07				212	24.3752	5.70654
P61019	Ras-related protein Rab-2A OS=Homo sapiens GN=RAB2A PE=1 SV=1 - [RAB2A_HUMAN]	4.4884	6.6	1	1	1	1	700196				212	23.5308	6.53662
P51606	N-acylglucosamine 2-epimerase OS=Homo sapiens GN=RENBP PE=1 SV=2 - [RENBP_HUMAN]	3.83204	2.81	1	1	1	1	4.95761e+06				427	48.799	6.3667
Q5JS13	Ras-specific guanine nucleotide-releasing factor RalGPS1 OS=Homo sapiens GN=RALGPS1 PE=1 SV=1 - [RGPS1_HUMAN]	0	3.59	1	1	1	1	190096				557	62.0938	9.11475
Q02543	60S ribosomal protein L18a OS=Homo sapiens GN=RPL18A PE=1 SV=2 - [RL18A_HUMAN]	2.39848	3.98	1	1	1	1	293165				176	20.7489	10.7114
P83731	60S ribosomal protein L24 OS=Homo sapiens GN=RPL24 PE=1 SV=1 - [RL24_HUMAN]	4.69124	8.28	1	1	1	1	5.62594e+06				157	17.7679	11.2534
Q9Y3U8	60S ribosomal protein L36 OS=Homo sapiens GN=RPL36 PE=1 SV=3 - [RL36_HUMAN]	2.80462	8.57	1	1	1	1	3.5236e+06				105	12.2459	11.5903
O15514	DNA-directed RNA polymerase II subunit RPB4 OS=Homo sapiens GN=POLR2D PE=1 SV=1 - [RPB4_HUMAN]	7.41225	14.79	1	1	1	2	1.0199e+07				142	16.3011	4.79248
Q9P2E9	Ribosome-binding protein 1 OS=Homo sapiens GN=RRBP1 PE=1 SV=4 - [RRBP1_HUMAN]	8.2484	0.92	1	1	1	2	1.08838e+06				1410	152.381	8.60205
P62861	40S ribosomal protein S30 OS=Homo sapiens GN=FAU PE=1 SV=1 - [RS30_HUMAN]	2.23162	18.64	1	1	1	1	887569				59	6.64382	12.147
O75396	Vesicle-trafficking protein SEC22b OS=Homo sapiens GN=SEC22B PE=1 SV=4 - [SC22B_HUMAN]	2.99184	4.65	1	1	1	1					215	24.5775	6.91748
O43175	D-3-phosphoglycerate dehydrogenase OS=Homo sapiens GN=PHGDH PE=1 SV=4 - [SERA_HUMAN]	4.06436	2.81	1	1	1	1	548960				533	56.6144	6.7124
Q13425	Beta-2-syntrophin OS=Homo sapiens GN=SNTB2 PE=1 SV=1 - [SNTB2_HUMAN]	3.1636	1.67	1	1	1	1	251842				540	57.913	8.82178
O75934	Pre-mRNA-splicing factor SPF27 OS=Homo sapiens GN=BCAS2 PE=1 SV=1 - [SPF27_HUMAN]	0	12.89	1	1	1	1					225	26.115	5.65576
Q13501	Sequestosome-1 OS=Homo sapiens GN=SQSTM1 PE=1 SV=1 - [SQSTM_HUMAN]	4.44166	5.91	1	1	1	1	992458				440	47.6569	5.22412
Q9Y285	Phenylalanine--tRNA ligase alpha subunit OS=Homo sapiens GN=FARSA PE=1 SV=3 - [SYFA_HUMAN]	3.09936	2.76	1	1	1	1					508	57.5275	7.79639
P07477	Trypsin-1 OS=Homo sapiens GN=PRSS1 PE=1 SV=1 - [TRY1_HUMAN]	3.60784	4.05	1	1	1	1	2.24837e+07				247	26.5411	6.50732
Q14157	Ubiquitin-associated protein 2-like OS=Homo sapiens GN=UBAP2L PE=1 SV=2 - [UBP2L_HUMAN]	3.03978	0.83	1	1	1	1	247340				1087	114.465	7.10791
Q13564	NEDD8-activating enzyme E1 regulatory subunit OS=Homo sapiens GN=NAE1 PE=1 SV=1 - [ULA1_HUMAN]	4.10101	2.81	1	1	1	1	1575896				534	60.2086	5.40186
O75436	Vacuolar protein sorting-associated protein 26A OS=Homo sapiens GN=VPS26A PE=1 SV=2 - [VP26A_HUMAN]	3.34755	4.59	1	1	1	1	1.91016e+06				327	38.1457	6.56592
Q9UJ78	Zinc finger MYM-type protein 5 OS=Homo sapiens GN=ZMYM5 PE=1 SV=4 - [ZMYM5_HUMAN]	2.93192	2.39	1	1	1	1	1.59266e+07				669	74.77	8.1626

## Sheet: IgG_IP_nuclear_603
Accession	Description	Score	Coverage	# Proteins	# Unique Peptides	# Peptides	# PSMs	Area	Heavy/Light	Heavy/Light Count	Heavy/Light Variability [%]	# AAs	MW [kDa]	calc. pI
Q14498	RNA-binding protein 39 OS=Homo sapiens GN=RBM39 PE=1 SV=2 - [RBM39_HUMAN]	18.4735	3.96	1	2	2	5	1.73676e+06	1.58734	2	1.61979	530	59.3427	10.0962
Q9BU76	Multiple myeloma tumor-associated protein 2 OS=Homo sapiens GN=MMTAG2 PE=1 SV=1 - [MMTA2_HUMAN]	7.5442	9.51	1	2	2	2	723068	1.56977	2	0.370723	263	29.3939	10.0229
O15143	Actin-related protein 2/3 complex subunit 1B OS=Homo sapiens GN=ARPC1B PE=1 SV=3 - [ARC1B_HUMAN]	3.26488	3.49	1	1	1	1	506806	1.46724	1		372	40.9234	8.35303
P09622	Dihydrolipoyl dehydrogenase, mitochondrial OS=Homo sapiens GN=DLD PE=1 SV=2 - [DLDH_HUMAN]	5.28439	1.96	1	1	1	2	558454	1.45107	1		509	54.143	7.85498
Q02218	2-oxoglutarate dehydrogenase, mitochondrial OS=Homo sapiens GN=OGDH PE=1 SV=3 - [ODO1_HUMAN]	5.41808	1.37	1	1	1	2	586314	1.43065	1		1023	115.861	6.85889
Q13185	Chromobox protein homolog 3 OS=Homo sapiens GN=CBX3 PE=1 SV=4 - [CBX3_HUMAN]	15.9516	14.75	1	2	2	4	1.83058e+06	1.41097	3	23.3532	183	20.7984	5.32568
P11387	DNA topoisomerase 1 OS=Homo sapiens GN=TOP1 PE=1 SV=2 - [TOP1_HUMAN]	82.1443	18.43	2	13	13	28	6.77619e+06	1.36249	12	8.81794	765	90.6689	9.30518
P04908	Histone H2A type 1-B/E OS=Homo sapiens GN=HIST1H2AB PE=1 SV=2 - [H2A1B_HUMAN]	56.2698	28.46	5	1	4	15	1.13873e+07	1.36157	1		130	14.127	11.0483
Q9NWB6	Arginine and glutamate-rich protein 1 OS=Homo sapiens GN=ARGLU1 PE=1 SV=1 - [ARGL1_HUMAN]	10.3673	8.42	1	3	3	4	2.28233e+06	1.34852	3	3.13122	273	33.1968	10.3452
Q9Y383	Putative RNA-binding protein Luc7-like 2 OS=Homo sapiens GN=LUC7L2 PE=1 SV=2 - [LC7L2_HUMAN]	18.3159	9.44	1	2	2	4	2.5346e+06	1.33253	2	8.44845	392	46.4856	10.0083
Q13428	Treacle protein OS=Homo sapiens GN=TCOF1 PE=1 SV=3 - [TCOF_HUMAN]	14.0794	3.7	1	4	4	4	1.50075e+06	1.31837	3	8.90687	1488	152.015	9.0415
P07305	Histone H1.0 OS=Homo sapiens GN=H1F0 PE=1 SV=3 - [H10_HUMAN]	2.52474	4.12	1	1	1	1	1.21214e+06	1.29957	1		194	20.8502	10.8433
Q8TA86	Retinitis pigmentosa 9 protein OS=Homo sapiens GN=RP9 PE=1 SV=2 - [RP9_HUMAN]	2.7223	5.43	1	1	1	1	528214	1.29142	1		221	26.0905	9.78857
O95232	Luc7-like protein 3 OS=Homo sapiens GN=LUC7L3 PE=1 SV=2 - [LC7L3_HUMAN]	3.70335	3.24	1	1	1	1	366757	1.28996	1		432	51.4351	9.78857
Q05519	Serine/arginine-rich splicing factor 11 OS=Homo sapiens GN=SRSF11 PE=1 SV=1 - [SRS11_HUMAN]	13.8702	6.2	1	3	3	5	1.84515e+06	1.27853	4	8.22486	484	53.5102	10.521
P24534	Elongation factor 1-beta OS=Homo sapiens GN=EEF1B2 PE=1 SV=3 - [EF1B_HUMAN]	8.05804	5.78	1	1	1	2	1.60947e+06	1.27245	1		225	24.7483	4.66553
Q9UQ35	Serine/arginine repetitive matrix protein 2 OS=Homo sapiens GN=SRRM2 PE=1 SV=2 - [SRRM2_HUMAN]	3.46615	0.51	1	1	1	1	605897	1.26513	1		2752	299.438	12.0591
O43707	Alpha-actinin-4 OS=Homo sapiens GN=ACTN4 PE=1 SV=2 - [ACTN4_HUMAN]	11.2739	4.28	1	3	3	3	1.03398e+06	1.25415	2	25.6338	911	104.788	5.43994
Q66PJ3	ADP-ribosylation factor-like protein 6-interacting protein 4 OS=Homo sapiens GN=ARL6IP4 PE=1 SV=2 - [AR6P4_HUMAN]	39.9657	12.35	1	4	4	10	4.96167e+06	1.24826	4	12.5614	421	44.8882	10.9312
O75367	Core histone macro-H2A.1 OS=Homo sapiens GN=H2AFY PE=1 SV=4 - [H2AY_HUMAN]	12.4338	5.91	1	1	1	3	940697	1.23501	1		372	39.5925	9.78857
O14602	Eukaryotic translation initiation factor 1A, Y-chromosomal OS=Homo sapiens GN=EIF1AY PE=1 SV=4 - [IF1AY_HUMAN]	2.86301	11.11	2	1	1	1	1.18657e+06	1.22938	1		144	16.4323	5.23682
P31948	Stress-induced-phosphoprotein 1 OS=Homo sapiens GN=STIP1 PE=1 SV=1 - [STIP1_HUMAN]	2.6378	2.95	1	1	1	1	384993	1.22681	1		543	62.5994	6.80029
P34897	Serine hydroxymethyltransferase, mitochondrial OS=Homo sapiens GN=SHMT2 PE=1 SV=3 - [GLYM_HUMAN]	2.72237	2.18	1	1	1	1	882304	1.22337	1		504	55.9577	8.52881
Q9GZV4	Eukaryotic translation initiation factor 5A-2 OS=Homo sapiens GN=EIF5A2 PE=1 SV=3 - [IF5A2_HUMAN]	3.3089	7.84	3	1	1	1	1.49607e+06	1.22192	1		153	16.7822	5.57959
P43243	Matrin-3 OS=Homo sapiens GN=MATR3 PE=1 SV=2 - [MATR3_HUMAN]	15.3984	7.67	1	3	3	5	875640	1.21221	4	4.04788	847	94.5648	6.25244
Q12906	Interleukin enhancer-binding factor 3 OS=Homo sapiens GN=ILF3 PE=1 SV=3 - [ILF3_HUMAN]	6.4517	1.57	1	1	1	2	793205	1.20856	1		894	95.2791	8.76318
P06899	Histone H2B type 1-J OS=Homo sapiens GN=HIST1H2BJ PE=1 SV=3 - [H2B1J_HUMAN]	56.9172	26.98	8	2	4	15	3.77067e+07	1.19869	2	5.42455	126	13.8956	10.3159
P38159	RNA-binding motif protein, X chromosome OS=Homo sapiens GN=RBMX PE=1 SV=3 - [RBMX_HUMAN]	14.5194	5.37	2	2	2	4	1.8636e+06	1.1933	2	33.671	391	42.3063	10.0522
Q15365	Poly(rC)-binding protein 1 OS=Homo sapiens GN=PCBP1 PE=1 SV=2 - [PCBP1_HUMAN]	23.5251	14.89	3	1	3	7	1.9209e+06	1.19282	1		356	37.4739	7.09326
O60814	Histone H2B type 1-K OS=Homo sapiens GN=HIST1H2BK PE=1 SV=3 - [H2B1K_HUMAN]	61.7251	26.98	10	2	4	16	4.26346e+07	1.18287	2	6.07539	126	13.8816	10.3159
P20839	Inosine-5'-monophosphate dehydrogenase 1 OS=Homo sapiens GN=IMPDH1 PE=1 SV=2 - [IMDH1_HUMAN]	15.8774	10.89	1	3	4	5	1.37471e+06	1.1828	3	9.14282	514	55.3705	6.90283
P60981	Destrin OS=Homo sapiens GN=DSTN PE=1 SV=3 - [DEST_HUMAN]	3.0952	6.67	1	1	1	1	3.35259e+06	1.17455	1		165	18.4935	7.85498
P45880	Voltage-dependent anion-selective channel protein 2 OS=Homo sapiens GN=VDAC2 PE=1 SV=2 - [VDAC2_HUMAN]	2.67019	6.8	1	1	1	1	700217	1.17076	1		294	31.5465	7.56201
P09429	High mobility group protein B1 OS=Homo sapiens GN=HMGB1 PE=1 SV=3 - [HMGB1_HUMAN]	6.17574	8.37	1	1	1	2	962411	1.16973	1		215	24.8782	5.74463
Q9Y3U8	60S ribosomal protein L36 OS=Homo sapiens GN=RPL36 PE=1 SV=3 - [RL36_HUMAN]	2.82543	8.57	1	1	1	1	1.25846e+06	1.1634	1		105	12.2459	11.5903
Q14152	Eukaryotic translation initiation factor 3 subunit A OS=Homo sapiens GN=EIF3A PE=1 SV=1 - [EIF3A_HUMAN]	2.76947	1.3	1	1	1	1	648107	1.16225	1		1382	166.468	6.78564
Q14247	Src substrate cortactin OS=Homo sapiens GN=CTTN PE=1 SV=2 - [SRC8_HUMAN]	3.5854	3.64	1	1	1	1	499998	1.15967	1		550	61.5485	5.40186
P05141	ADP/ATP translocase 2 OS=Homo sapiens GN=SLC25A5 PE=1 SV=7 - [ADT2_HUMAN]	5.31179	3.02	2	1	1	2	1.19805e+06	1.15885	1		298	32.8312	9.68604
P62851	40S ribosomal protein S25 OS=Homo sapiens GN=RPS25 PE=1 SV=1 - [RS25_HUMAN]	13.4991	15.2	1	2	2	4	5.3818e+06	1.15461	2	8.21077	125	13.7337	10.1108
P62854	40S ribosomal protein S26 OS=Homo sapiens GN=RPS26 PE=1 SV=3 - [RS26_HUMAN]	5.0933	7.83	2	1	1	2	4.48343e+06	1.15376	1		115	13.0071	11.0044
Q7Z406	Myosin-14 OS=Homo sapiens GN=MYH14 PE=1 SV=2 - [MYH14_HUMAN]	43.2559	5.46	1	6	9	12	1.47325e+06	1.15221	5	8.35279	1995	227.732	5.60498
P38919	Eukaryotic initiation factor 4A-III OS=Homo sapiens GN=EIF4A3 PE=1 SV=4 - [IF4A3_HUMAN]	21.5138	10.22	1	2	3	6	2.70862e+06	1.14819	2	42.6627	411	46.8412	6.72705
P63244	Guanine nucleotide-binding protein subunit beta-2-like 1 OS=Homo sapiens GN=GNB2L1 PE=1 SV=3 - [GBLP_HUMAN]	6.1326	7.57	1	2	2	2	1.27549e+06	1.14779	1		317	35.0546	7.69385
P35637	RNA-binding protein FUS OS=Homo sapiens GN=FUS PE=1 SV=1 - [FUS_HUMAN]	8.27149	3.04	1	1	1	2	1.85374e+06	1.1454	1		526	53.3938	9.36377
P61513	60S ribosomal protein L37a OS=Homo sapiens GN=RPL37A PE=1 SV=2 - [RL37A_HUMAN]	10.3807	19.57	1	1	1	2	4.38388e+06	1.14533	1		92	10.2685	10.4331
P12268	Inosine-5'-monophosphate dehydrogenase 2 OS=Homo sapiens GN=IMPDH2 PE=1 SV=2 - [IMDH2_HUMAN]	20.4189	5.84	1	2	3	6	1.52602e+06	1.14007	3	2.08455	514	55.7696	6.90283
P31943	Heterogeneous nuclear ribonucleoprotein H OS=Homo sapiens GN=HNRNPH1 PE=1 SV=4 - [HNRH1_HUMAN]	30.0922	13.81	2	2	4	7	2.2355e+06	1.1395	2	12.4226	449	49.1984	6.30322
P62847	40S ribosomal protein S24 OS=Homo sapiens GN=RPS24 PE=1 SV=1 - [RS24_HUMAN]	15.0803	18.05	1	2	2	4	1.2573e+06	1.13441	2	16.0165	133	15.4134	10.7847
Q12905	Interleukin enhancer-binding factor 2 OS=Homo sapiens GN=ILF2 PE=1 SV=2 - [ILF2_HUMAN]	6.91589	2.56	1	1	1	2	668773	1.13206	1		390	43.0352	5.26221
Q9H6S3	Epidermal growth factor receptor kinase substrate 8-like protein 2 OS=Homo sapiens GN=EPS8L2 PE=1 SV=2 - [ES8L2_HUMAN]	3.2605	2.52	1	1	1	1	401099	1.13064	1		715	80.5701	6.84424
P61254	60S ribosomal protein L26 OS=Homo sapiens GN=RPL26 PE=1 SV=1 - [RL26_HUMAN]	18.5475	27.59	2	5	5	7	1.49484e+06	1.12973	5	13.9543	145	17.2475	10.5503
P26599	Polypyrimidine tract-binding protein 1 OS=Homo sapiens GN=PTBP1 PE=1 SV=1 - [PTBP1_HUMAN]	2.8523	2.07	1	1	1	1	2.41723e+06	1.12796	1		531	57.1856	9.17334
P62891	60S ribosomal protein L39 OS=Homo sapiens GN=RPL39 PE=1 SV=2 - [RL39_HUMAN]	2.27699	19.61	2	1	1	1	1.37008e+06	1.12475	1		51	6.40265	12.5571
P36578	60S ribosomal protein L4 OS=Homo sapiens GN=RPL4 PE=1 SV=5 - [RL4_HUMAN]	35.0166	16.16	1	5	5	11	1.92643e+06	1.12319	5	11.0211	427	47.6674	11.063
Q96KK5	Histone H2A type 1-H OS=Homo sapiens GN=HIST1H2AH PE=1 SV=3 - [H2A1H_HUMAN]	69.413	28.91	9	1	4	18	1.13873e+07	1.12121	2	3.04004	128	13.8978	10.8872
Q16629	Serine/arginine-rich splicing factor 7 OS=Homo sapiens GN=SRSF7 PE=1 SV=1 - [SRSF7_HUMAN]	2.42947	7.14	1	1	1	1	2.15328e+06	1.12054	1		238	27.35	11.8247
P12956	X-ray repair cross-complementing protein 6 OS=Homo sapiens GN=XRCC6 PE=1 SV=2 - [XRCC6_HUMAN]	10.0915	6.57	1	3	3	5	948119	1.11837	3	3.23746	609	69.7991	6.63916
P11388	DNA topoisomerase 2-alpha OS=Homo sapiens GN=TOP2A PE=1 SV=3 - [TOP2A_HUMAN]	8.3474	0.78	1	1	1	2	869600	1.11469	1		1531	174.276	8.71924
P40763	Signal transducer and activator of transcription 3 OS=Homo sapiens GN=STAT3 PE=1 SV=2 - [STAT3_HUMAN]	8.11849	3.38	1	1	1	2	1.36713e+06	1.11344	1		770	88.0114	6.30322
Q99729	Heterogeneous nuclear ribonucleoprotein A/B OS=Homo sapiens GN=HNRNPAB PE=1 SV=2 - [ROAA_HUMAN]	2.06757	3.92	1	1	1	1	2.0013e+06	1.11267	1		332	36.2024	8.20654
P21333	Filamin-A OS=Homo sapiens GN=FLNA PE=1 SV=4 - [FLNA_HUMAN]	7.26942	1.1	1	2	2	2	631982	1.11178	2	27.3734	2647	280.564	6.06201
P61313	60S ribosomal protein L15 OS=Homo sapiens GN=RPL15 PE=1 SV=2 - [RL15_HUMAN]	42.4544	28.43	1	5	5	14	3.62835e+06	1.11175	5	0.192847	204	24.1311	11.6196
O75131	Copine-3 OS=Homo sapiens GN=CPNE3 PE=1 SV=1 - [CPNE3_HUMAN]	29.2702	7.64	8	4	4	10	1.32344e+06	1.10823	4	21.4689	537	60.0921	5.84619
P62701	40S ribosomal protein S4, X isoform OS=Homo sapiens GN=RPS4X PE=1 SV=2 - [RS4X_HUMAN]	28.2559	14.07	3	4	4	9	1.9424e+06	1.10654	4	4.25213	263	29.5791	10.1548
P78527	DNA-dependent protein kinase catalytic subunit OS=Homo sapiens GN=PRKDC PE=1 SV=3 - [PRKDC_HUMAN]	6.62872	0.75	1	2	2	2	912532	1.10609	2	9.52872	4128	468.788	7.12256
Q92945	Far upstream element-binding protein 2 OS=Homo sapiens GN=KHSRP PE=1 SV=4 - [FUBP2_HUMAN]	24.7844	7.17	1	4	4	7	773430	1.10481	3	3.06479	711	73.07	7.29834
P55072	Transitional endoplasmic reticulum ATPase OS=Homo sapiens GN=VCP PE=1 SV=4 - [TERA_HUMAN]	8.09032	4.71	2	3	3	3	562691	1.10264	2	1.29031	806	89.2657	5.26221
Q96AE4	Far upstream element-binding protein 1 OS=Homo sapiens GN=FUBP1 PE=1 SV=3 - [FUBP1_HUMAN]	18.1277	6.06	1	3	3	6	1.21867e+06	1.10242	3	10.7527	644	67.5185	7.60596
P49207	60S ribosomal protein L34 OS=Homo sapiens GN=RPL34 PE=1 SV=3 - [RL34_HUMAN]	5.70611	6.84	1	1	1	2	2.84992e+06	1.09767	1		117	13.2845	11.4731
P53999	Activated RNA polymerase II transcriptional coactivator p15 OS=Homo sapiens GN=SUB1 PE=1 SV=3 - [TCP4_HUMAN]	8.0611	18.11	1	3	3	3	1.23703e+06	1.09735	3	6.41511	127	14.3864	9.59814
P46781	40S ribosomal protein S9 OS=Homo sapiens GN=RPS9 PE=1 SV=3 - [RS9_HUMAN]	16.4343	12.89	1	3	3	6	1.45131e+06	1.09448	2	2.46522	194	22.5776	10.6528
P62857	40S ribosomal protein S28 OS=Homo sapiens GN=RPS28 PE=1 SV=1 - [RS28_HUMAN]	2.2832	13.04	1	1	1	1	987186	1.09231	1		69	7.8362	10.6968
P42677	40S ribosomal protein S27 OS=Homo sapiens GN=RPS27 PE=1 SV=3 - [RS27_HUMAN]	3.35662	14.29	1	1	1	1	813838	1.09194	1		84	9.45484	9.45166
P08621	U1 small nuclear ribonucleoprotein 70 kDa OS=Homo sapiens GN=SNRNP70 PE=1 SV=2 - [RU17_HUMAN]	3.23389	3.66	1	1	1	1	825380	1.09025	1		437	51.5258	9.93506
P35268	60S ribosomal protein L22 OS=Homo sapiens GN=RPL22 PE=1 SV=2 - [RL22_HUMAN]	37.1229	31.25	1	4	4	11	1.20405e+07	1.08981	4	17.1154	128	14.7778	9.18799
P50914	60S ribosomal protein L14 OS=Homo sapiens GN=RPL14 PE=1 SV=4 - [RL14_HUMAN]	13.4641	11.16	1	2	2	4	3.15798e+06	1.08858	2	8.24623	215	23.417	10.9312
Q14103	Heterogeneous nuclear ribonucleoprotein D0 OS=Homo sapiens GN=HNRNPD PE=1 SV=1 - [HNRPD_HUMAN]	9.42255	3.94	1	1	1	2	3.97e+06	1.08065	1		355	38.4103	7.81104
P62241	40S ribosomal protein S8 OS=Homo sapiens GN=RPS8 PE=1 SV=2 - [RS8_HUMAN]	36.8836	32.69	1	6	6	11	5.65479e+06	1.08025	6	3.37391	208	24.1902	10.3159
P63220	40S ribosomal protein S21 OS=Homo sapiens GN=RPS21 PE=1 SV=1 - [RS21_HUMAN]	7.62536	33.73	1	2	2	2	938837	1.07868	2	13.1721	83	9.10557	8.49951
P62805	Histone H4 OS=Homo sapiens GN=HIST1H4A PE=1 SV=2 - [H4_HUMAN]	45.6117	41.75	1	4	4	17	1.89297e+07	1.0783	5	5.3792	103	11.3604	11.356
Q9H3K6	BolA-like protein 2 OS=Homo sapiens GN=BOLA2 PE=1 SV=1 - [BOLA2_HUMAN]	8.8974	18.6	1	1	1	2	1.5836e+06	1.07467	1		86	10.1102	6.52197
Q07020	60S ribosomal protein L18 OS=Homo sapiens GN=RPL18 PE=1 SV=2 - [RL18_HUMAN]	12.9117	6.91	1	1	1	3	4.78784e+06	1.07416	1		188	21.6211	11.7222
Q13243	Serine/arginine-rich splicing factor 5 OS=Homo sapiens GN=SRSF5 PE=1 SV=1 - [SRSF5_HUMAN]	5.7987	3.31	3	1	1	2	2.99045e+06	1.07365	1		272	31.2453	11.5903
P21291	Cysteine and glycine-rich protein 1 OS=Homo sapiens GN=CSRP1 PE=1 SV=3 - [CSRP1_HUMAN]	11.3826	19.17	1	2	2	3	5.72676e+06	1.07278	1		193	20.5538	8.57275
P62263	40S ribosomal protein S14 OS=Homo sapiens GN=RPS14 PE=1 SV=3 - [RS14_HUMAN]	2.80732	10.6	1	1	1	1	3.01478e+06	1.07275	1		151	16.2625	10.0522
P55060	Exportin-2 OS=Homo sapiens GN=CSE1L PE=1 SV=3 - [XPO2_HUMAN]	3.11718	1.75	1	1	1	1	924182	1.07111	1		971	110.346	5.77002
P20042	Eukaryotic translation initiation factor 2 subunit 2 OS=Homo sapiens GN=EIF2S2 PE=1 SV=2 - [IF2B_HUMAN]	2.90353	6.01	1	1	1	1	415582	1.06903	1		333	38.3644	5.79541
P09651	Heterogeneous nuclear ribonucleoprotein A1 OS=Homo sapiens GN=HNRNPA1 PE=1 SV=5 - [ROA1_HUMAN]	37.8935	25	2	5	6	15	6.55793e+06	1.06638	6	6.70916	372	38.7231	9.12939
P27635	60S ribosomal protein L10 OS=Homo sapiens GN=RPL10 PE=1 SV=4 - [RL10_HUMAN]	5.44256	5.14	2	1	1	2	765643	1.0657	1		214	24.5879	10.0815
P09110	3-ketoacyl-CoA thiolase, peroxisomal OS=Homo sapiens GN=ACAA1 PE=1 SV=2 - [THIK_HUMAN]	2.89404	4.95	1	1	1	1	1.00838e+06	1.06566	1		424	44.2639	8.44092
Q9UKM9	RNA-binding protein Raly OS=Homo sapiens GN=RALY PE=1 SV=1 - [RALY_HUMAN]	5.91031	10.46	1	2	2	2	981091	1.06299	2	8.09863	306	32.4436	9.17334
P53396	ATP-citrate synthase OS=Homo sapiens GN=ACLY PE=1 SV=3 - [ACLY_HUMAN]	19.4103	5.9	1	4	4	7	1.55742e+06	1.06129	4	5.53152	1101	120.762	7.32764
P52272	Heterogeneous nuclear ribonucleoprotein M OS=Homo sapiens GN=HNRNPM PE=1 SV=3 - [HNRPM_HUMAN]	27.9991	9.32	1	4	4	8	2.07138e+06	1.06105	4	4.00061	730	77.4643	8.70459
P06748	Nucleophosmin OS=Homo sapiens GN=NPM1 PE=1 SV=2 - [NPM_HUMAN]	18.4037	23.47	1	4	4	7	2.25472e+06	1.05977	4	11.6155	294	32.5548	4.77979
Q9P2E9	Ribosome-binding protein 1 OS=Homo sapiens GN=RRBP1 PE=1 SV=4 - [RRBP1_HUMAN]	18.2786	3.9	1	3	3	5	726199	1.0589	1		1410	152.381	8.60205
Q13263	Transcription intermediary factor 1-beta OS=Homo sapiens GN=TRIM28 PE=1 SV=5 - [TIF1B_HUMAN]	20.1354	6.83	1	4	4	6	977486	1.05635	3	17.2095	835	88.4934	5.77002
P40227	T-complex protein 1 subunit zeta OS=Homo sapiens GN=CCT6A PE=1 SV=3 - [TCPZ_HUMAN]	2.55809	3.2	1	1	1	2	154284	1.05468	1		531	57.9876	6.68311
P10515	Dihydrolipoyllysine-residue acetyltransferase component of pyruvate dehydrogenase complex, mitochondrial OS=Homo sapiens GN=DLAT PE=1 SV=3 - [ODP2_HUMAN]	5.03373	1.39	1	1	1	2	555739	1.05398	1		647	68.9531	7.84033
Q8N4Q1	Mitochondrial intermembrane space import and assembly protein 40 OS=Homo sapiens GN=CHCHD4 PE=1 SV=1 - [MIA40_HUMAN]	10.0834	16.9	1	1	1	3	2.47033e+06	1.05395	1		142	15.9861	4.31006
P02545	Prelamin-A/C OS=Homo sapiens GN=LMNA PE=1 SV=1 - [LMNA_HUMAN]	98.9834	26.96	3	15	15	26	5.7518e+06	1.05219	16	7.79706	664	74.0947	7.02002
Q99873	Protein arginine N-methyltransferase 1 OS=Homo sapiens GN=PRMT1 PE=1 SV=2 - [ANM1_HUMAN]	2.11572	4.16	1	1	1	1	898284	1.05197	1		361	41.4885	5.42725
P46776	60S ribosomal protein L27a OS=Homo sapiens GN=RPL27A PE=1 SV=2 - [RL27A_HUMAN]	16.4797	16.22	1	2	2	5	6.11652e+06	1.05035	2	10.6569	148	16.551	11.0044
P62266	40S ribosomal protein S23 OS=Homo sapiens GN=RPS23 PE=1 SV=3 - [RS23_HUMAN]	10.3408	16.08	1	2	2	3	3.26875e+06	1.04952	2	7.58492	143	15.7977	10.4917
P61956	Small ubiquitin-related modifier 2 OS=Homo sapiens GN=SUMO2 PE=1 SV=3 - [SUMO2_HUMAN]	7.96688	12.63	3	1	1	2	2.24172e+06	1.04728	1		95	10.8644	5.50342
O76031	ATP-dependent Clp protease ATP-binding subunit clpX-like, mitochondrial OS=Homo sapiens GN=CLPX PE=1 SV=2 - [CLPX_HUMAN]	31.2202	12.8	1	6	6	9	935996	1.04662	6	11.559	633	69.1807	7.57666
P04626	Receptor tyrosine-protein kinase erbB-2 OS=Homo sapiens GN=ERBB2 PE=1 SV=1 - [ERBB2_HUMAN]	7.70827	1.2	1	1	1	2	1.75525e+06	1.04176	1		1255	137.821	5.90967
P51991	Heterogeneous nuclear ribonucleoprotein A3 OS=Homo sapiens GN=HNRNPA3 PE=1 SV=2 - [ROA3_HUMAN]	27.2501	18.78	1	3	4	9	2.31938e+06	1.03855	4	15.8157	378	39.5706	9.01221
Q01130	Serine/arginine-rich splicing factor 2 OS=Homo sapiens GN=SRSF2 PE=1 SV=4 - [SRSF2_HUMAN]	9.29138	3.62	2	1	1	3	2.21879e+06	1.03851	1		221	25.4612	11.854
Q9Y5S9	RNA-binding protein 8A OS=Homo sapiens GN=RBM8A PE=1 SV=1 - [RBM8A_HUMAN]	2.70904	10.92	1	1	1	1	681529	1.03683	1		174	19.8767	5.71924
P46777	60S ribosomal protein L5 OS=Homo sapiens GN=RPL5 PE=1 SV=3 - [RL5_HUMAN]	5.4347	8.75	1	2	2	2	1.70205e+06	1.03657	2	6.04633	297	34.3407	9.71533
P68032	Actin, alpha cardiac muscle 1 OS=Homo sapiens GN=ACTC1 PE=1 SV=1 - [ACTC_HUMAN]	116.324	24.4	4	1	9	37	3.72037e+07	1.03529	3	7.14383	377	41.9919	5.38916
P52597	Heterogeneous nuclear ribonucleoprotein F OS=Homo sapiens GN=HNRNPF PE=1 SV=3 - [HNRPF_HUMAN]	31.9666	17.35	1	3	5	8	1.67332e+06	1.0342	2	21.5617	415	45.6429	5.57959
P62906	60S ribosomal protein L10a OS=Homo sapiens GN=RPL10A PE=1 SV=2 - [RL10A_HUMAN]	11.7697	11.52	1	2	2	4	1.32947e+06	1.0332	3	5.18696	217	24.8155	9.93506
P16403	Histone H1.2 OS=Homo sapiens GN=HIST1H1C PE=1 SV=2 - [H12_HUMAN]	87.7524	17.84	5	6	6	25	7.80559e+06	1.03238	9	10.492	213	21.3517	10.9312
P62280	40S ribosomal protein S11 OS=Homo sapiens GN=RPS11 PE=1 SV=3 - [RS11_HUMAN]	2.23118	5.06	1	1	1	1	1.76924e+06	1.03174	1		158	18.419	10.3013
Q02878	60S ribosomal protein L6 OS=Homo sapiens GN=RPL6 PE=1 SV=3 - [RL6_HUMAN]	14.2699	18.75	1	5	5	6	2.39039e+06	1.03106	5	6.39734	288	32.7076	10.5796
Q06210	Glutamine--fructose-6-phosphate aminotransferase [isomerizing] 1 OS=Homo sapiens GN=GFPT1 PE=1 SV=3 - [GFPT1_HUMAN]	2.68744	2.15	1	1	1	1	487044	1.03052	1		699	78.7563	7.10791
P16401	Histone H1.5 OS=Homo sapiens GN=HIST1H1B PE=1 SV=3 - [H15_HUMAN]	56.7409	15.04	1	5	5	15	3.51706e+06	1.02866	5	9.06541	226	22.5665	10.9165
P49327	Fatty acid synthase OS=Homo sapiens GN=FASN PE=1 SV=3 - [FAS_HUMAN]	743.829	34.97	2	72	72	213	1.92379e+07	1.02673	79	7.1131	2511	273.254	6.44287
O43143	Pre-mRNA-splicing factor ATP-dependent RNA helicase DHX15 OS=Homo sapiens GN=DHX15 PE=1 SV=2 - [DHX15_HUMAN]	7.68251	1.51	1	1	1	2	283345	1.02538	1		795	90.8752	7.45947
Q13268	Dehydrogenase/reductase SDR family member 2, mitochondrial OS=Homo sapiens GN=DHRS2 PE=1 SV=4 - [DHRS2_HUMAN]	36.6281	15.36	1	4	4	12	4.22381e+06	1.02389	4	3.92005	280	29.9077	9.01221
Q6NXT2	Histone H3.3C OS=Homo sapiens GN=H3F3C PE=1 SV=3 - [H3C_HUMAN]	20.1063	11.85	5	2	2	8	1.20168e+07	1.02356	2	0.351426	135	15.2044	11.1069
Q07955	Serine/arginine-rich splicing factor 1 OS=Homo sapiens GN=SRSF1 PE=1 SV=2 - [SRSF1_HUMAN]	6.43495	4.03	1	1	1	2	1.17377e+06	1.02353	1		248	27.7278	10.3599
P31942	Heterogeneous nuclear ribonucleoprotein H3 OS=Homo sapiens GN=HNRNPH3 PE=1 SV=2 - [HNRH3_HUMAN]	7.9579	3.47	1	1	1	2	1.53109e+06	1.02304	1		346	36.9031	6.87354
Q07666	KH domain-containing, RNA-binding, signal transduction-associated protein 1 OS=Homo sapiens GN=KHDRBS1 PE=1 SV=1 - [KHDR1_HUMAN]	6.15752	3.16	1	1	1	2	825604	1.02266	1		443	48.1972	8.66064
P23246	Splicing factor, proline- and glutamine-rich OS=Homo sapiens GN=SFPQ PE=1 SV=2 - [SFPQ_HUMAN]	24.535	11.32	1	5	6	8	1.97759e+06	1.02262	5	6.53825	707	76.1016	9.43701
P61353	60S ribosomal protein L27 OS=Homo sapiens GN=RPL27 PE=1 SV=2 - [RL27_HUMAN]	15.9184	32.35	1	3	3	7	5.48137e+06	1.02219	3	11.4037	136	15.7877	10.5649
P61247	40S ribosomal protein S3a OS=Homo sapiens GN=RPS3A PE=1 SV=2 - [RS3A_HUMAN]	24.9996	9.47	1	3	3	9	2.2988e+06	1.01977	3	2.83912	264	29.9257	9.72998
Q00839	Heterogeneous nuclear ribonucleoprotein U OS=Homo sapiens GN=HNRNPU PE=1 SV=6 - [HNRPU_HUMAN]	84.1579	14.55	1	9	9	25	3.79946e+06	1.01823	11	7.30025	825	90.528	5.99854
P26373	60S ribosomal protein L13 OS=Homo sapiens GN=RPL13 PE=1 SV=4 - [RL13_HUMAN]	14.9392	14.22	1	3	3	5	2.24308e+06	1.01764	3	3.37404	211	24.2465	11.6489
Q15717	ELAV-like protein 1 OS=Homo sapiens GN=ELAVL1 PE=1 SV=2 - [ELAV1_HUMAN]	3.98312	3.37	1	1	1	1	899801	1.01536	1		326	36.0692	9.17334
Q7KZF4	Staphylococcal nuclease domain-containing protein 1 OS=Homo sapiens GN=SND1 PE=1 SV=1 - [SND1_HUMAN]	73.9376	17.58	1	12	12	22	2.27216e+06	1.01336	13	8.27582	910	101.934	7.1665
Q16698	2,4-dienoyl-CoA reductase, mitochondrial OS=Homo sapiens GN=DECR1 PE=1 SV=1 - [DECR_HUMAN]	8.43694	6.57	1	1	1	2	1.86115e+06	1.01322	1		335	36.0448	9.27588
P62899	60S ribosomal protein L31 OS=Homo sapiens GN=RPL31 PE=1 SV=1 - [RL31_HUMAN]	3.28458	7.2	1	1	1	1	3.43872e+06	1.01215	1		125	14.4539	10.5356
P22061	Protein-L-isoaspartate(D-aspartate) O-methyltransferase OS=Homo sapiens GN=PCMT1 PE=1 SV=4 - [PIMT_HUMAN]	14.8903	11.45	1	2	2	5	708856	1.01118	1		227	24.6206	7.21045
P35606	Coatomer subunit beta' OS=Homo sapiens GN=COPB2 PE=1 SV=2 - [COPB2_HUMAN]	2.17437	0.99	1	1	1	1	419498	1.01073	1		906	102.422	5.2749
P62829	60S ribosomal protein L23 OS=Homo sapiens GN=RPL23 PE=1 SV=1 - [RL23_HUMAN]	5.84302	12.86	1	2	2	2	1.92034e+06	1.00872	2	2.39059	140	14.8561	10.5063
P22626	Heterogeneous nuclear ribonucleoproteins A2/B1 OS=Homo sapiens GN=HNRNPA2B1 PE=1 SV=2 - [ROA2_HUMAN]	86.4232	45.04	1	9	10	24	8.73878e+06	1.0078	12	8.35206	353	37.4067	8.95361
P19338	Nucleolin OS=Homo sapiens GN=NCL PE=1 SV=3 - [NUCL_HUMAN]	48.2121	15.21	1	7	7	13	3.00279e+06	1.00571	7	7.37726	710	76.5684	4.70361
O75369	Filamin-B OS=Homo sapiens GN=FLNB PE=1 SV=2 - [FLNB_HUMAN]	11.4094	1.04	1	2	2	3	1.15238e+06	1.00541	2	7.68307	2602	277.99	5.73193
P31949	Protein S100-A11 OS=Homo sapiens GN=S100A11 PE=1 SV=2 - [S10AB_HUMAN]	5.41978	15.24	1	1	1	1	1.12921e+06	1.00493	1		105	11.7328	7.12256
P61978	Heterogeneous nuclear ribonucleoprotein K OS=Homo sapiens GN=HNRNPK PE=1 SV=1 - [HNRPK_HUMAN]	60.4496	20.95	1	9	9	18	4.38265e+06	1.0019	9	7.32189	463	50.9444	5.5415
P14866	Heterogeneous nuclear ribonucleoprotein L OS=Homo sapiens GN=HNRNPL PE=1 SV=2 - [HNRPL_HUMAN]	13.1286	5.43	1	2	2	3	2.02942e+06	1.00084	1		589	64.0924	8.22119
P31946	14-3-3 protein beta/alpha OS=Homo sapiens GN=YWHAB PE=1 SV=3 - [1433B_HUMAN]	21.8548	21.95	6	1	4	7	2.03578e+06	1	1		246	28.0648	4.83057
P60660	Myosin light polypeptide 6 OS=Homo sapiens GN=MYL6 PE=1 SV=2 - [MYL6_HUMAN]	61.99	50.99	4	6	6	16	4.54137e+06	0.999919	5	3.37699	151	16.9191	4.65283
P62249	40S ribosomal protein S16 OS=Homo sapiens GN=RPS16 PE=1 SV=2 - [RS16_HUMAN]	32.4032	41.1	1	7	7	11	2.23468e+06	0.998713	7	5.39863	146	16.435	10.2134
P62424	60S ribosomal protein L7a OS=Homo sapiens GN=RPL7A PE=1 SV=2 - [RL7A_HUMAN]	18.2027	9.02	1	2	2	5	3.63399e+06	0.998669	2	4.55515	266	29.977	10.6089
P60709	Actin, cytoplasmic 1 OS=Homo sapiens GN=ACTB PE=1 SV=1 - [ACTB_HUMAN]	176.29	45.07	7	5	13	51	8.61652e+07	0.998505	8	4.2272	375	41.7097	5.47803
P25705	ATP synthase subunit alpha, mitochondrial OS=Homo sapiens GN=ATP5A1 PE=1 SV=1 - [ATPA_HUMAN]	6.49706	4.88	1	2	2	2	272466	0.998346	1		553	59.7136	9.12939
Q13148	TAR DNA-binding protein 43 OS=Homo sapiens GN=TARDBP PE=1 SV=1 - [TADBP_HUMAN]	8.40644	4.35	1	1	1	2	494768	0.99748	1		414	44.7113	6.18896
Q9NPA3	Mid1-interacting protein 1 OS=Homo sapiens GN=MID1IP1 PE=1 SV=1 - [M1IP1_HUMAN]	6.92053	6.56	1	1	1	2	830170	0.996783	1		183	20.1889	5.50342
P62244	40S ribosomal protein S15a OS=Homo sapiens GN=RPS15A PE=1 SV=2 - [RS15A_HUMAN]	22.9339	23.85	1	3	3	7	1.95356e+06	0.996238	3	0.36584	130	14.83	10.1255
O60841	Eukaryotic translation initiation factor 5B OS=Homo sapiens GN=EIF5B PE=1 SV=4 - [IF2P_HUMAN]	18.239	2.3	1	2	2	5	1.97392e+06	0.994762	2	9.83119	1220	138.742	5.49072
P25398	40S ribosomal protein S12 OS=Homo sapiens GN=RPS12 PE=1 SV=3 - [RS12_HUMAN]	2.65688	7.58	1	1	1	1	865062	0.994582	1		132	14.5055	7.21045
O00148	ATP-dependent RNA helicase DDX39A OS=Homo sapiens GN=DDX39A PE=1 SV=2 - [DX39A_HUMAN]	7.54864	7.96	2	3	3	4	1.06167e+06	0.994451	2	24.6748	427	49.098	5.68115
P29401	Transketolase OS=Homo sapiens GN=TKT PE=1 SV=3 - [TKT_HUMAN]	29.828	14.13	1	5	5	9	1.84234e+06	0.994108	5	0.890812	623	67.8347	7.66455
P15880	40S ribosomal protein S2 OS=Homo sapiens GN=RPS2 PE=1 SV=2 - [RS2_HUMAN]	14.4267	7.85	1	2	2	4	3.84683e+06	0.993199	2	4.87309	293	31.3046	10.2427
P23528	Cofilin-1 OS=Homo sapiens GN=CFL1 PE=1 SV=3 - [COF1_HUMAN]	7.88163	6.63	2	1	1	2	4.51945e+06	0.991708	1		166	18.4907	8.08936
P11498	Pyruvate carboxylase, mitochondrial OS=Homo sapiens GN=PC PE=1 SV=2 - [PYC_HUMAN]	70.1103	10.27	1	9	9	18	2.37865e+06	0.989984	9	2.16686	1178	129.551	6.84424
P18621	60S ribosomal protein L17 OS=Homo sapiens GN=RPL17 PE=1 SV=3 - [RL17_HUMAN]	3.01918	5.43	1	1	1	1	2.03655e+06	0.988863	1		184	21.3833	10.1694
P62277	40S ribosomal protein S13 OS=Homo sapiens GN=RPS13 PE=1 SV=2 - [RS13_HUMAN]	18.1844	37.75	1	5	5	8	1.98746e+06	0.987713	5	8.25354	151	17.2117	10.5356
P46778	60S ribosomal protein L21 OS=Homo sapiens GN=RPL21 PE=1 SV=2 - [RL21_HUMAN]	24.0447	16.25	1	2	2	6	3.36783e+06	0.987476	3	4.54703	160	18.5531	10.4917
Q9Y247	Protein FAM50B OS=Homo sapiens GN=FAM50B PE=1 SV=1 - [FA50B_HUMAN]	3.10883	4	2	1	1	1	181071	0.98704	1		325	38.6849	8.86572
Q8WUM4	Programmed cell death 6-interacting protein OS=Homo sapiens GN=PDCD6IP PE=1 SV=1 - [PDC6I_HUMAN]	4.59077	1.5	1	1	1	1	512626	0.98578	1		868	95.9631	6.52197
P46783	40S ribosomal protein S10 OS=Homo sapiens GN=RPS10 PE=1 SV=1 - [RS10_HUMAN]	23.9131	13.94	2	2	2	7	1.171e+06	0.984968	2	7.54323	165	18.8859	10.1548
P11142	Heat shock cognate 71 kDa protein OS=Homo sapiens GN=HSPA8 PE=1 SV=1 - [HSP7C_HUMAN]	114.879	27.55	2	16	17	34	8.48681e+06	0.984223	19	9.71629	646	70.8542	5.51611
P62888	60S ribosomal protein L30 OS=Homo sapiens GN=RPL30 PE=1 SV=2 - [RL30_HUMAN]	4.23149	10.43	1	1	1	1	847076	0.983787	1		115	12.7757	9.62744
P38646	Stress-70 protein, mitochondrial OS=Homo sapiens GN=HSPA9 PE=1 SV=2 - [GRP75_HUMAN]	32.0917	12.67	1	6	6	10	2.41402e+06	0.982682	5	18.9374	679	73.6348	6.16357
P06703	Protein S100-A6 OS=Homo sapiens GN=S100A6 PE=1 SV=1 - [S10A6_HUMAN]	5.48178	8.89	1	1	1	2	3.76823e+06	0.982228	1		90	10.1733	5.47803
P67936	Tropomyosin alpha-4 chain OS=Homo sapiens GN=TPM4 PE=1 SV=3 - [TPM4_HUMAN]	4.73019	5.65	4	1	1	2	5.90748e+06	0.981051	1		248	28.5045	4.69092
O95831	Apoptosis-inducing factor 1, mitochondrial OS=Homo sapiens GN=AIFM1 PE=1 SV=1 - [AIFM1_HUMAN]	100.525	24.8	1	10	10	27	1.09023e+07	0.98036	12	8.54663	613	66.8589	8.95361
P54886	Delta-1-pyrroline-5-carboxylate synthase OS=Homo sapiens GN=ALDH18A1 PE=1 SV=2 - [P5CS_HUMAN]	47.5511	10.06	1	8	8	14	1.61162e+06	0.97795	8	14.7841	795	87.2475	7.12256
P62917	60S ribosomal protein L8 OS=Homo sapiens GN=RPL8 PE=1 SV=2 - [RL8_HUMAN]	13.5192	10.51	1	2	2	4	2.79884e+06	0.977651	2	7.00144	257	28.0073	11.0337
Q15149	Plectin OS=Homo sapiens GN=PLEC PE=1 SV=3 - [PLEC_HUMAN]	106.04	5.17	1	16	19	33	1.69177e+06	0.976774	13	18.1941	4684	531.466	5.96045
P51858	Hepatoma-derived growth factor OS=Homo sapiens GN=HDGF PE=1 SV=1 - [HDGF_HUMAN]	2.90387	4.17	1	1	1	1	922078	0.976365	1		240	26.7719	4.729
P78347	General transcription factor II-I OS=Homo sapiens GN=GTF2I PE=1 SV=2 - [GTF2I_HUMAN]	18.8872	7.31	1	6	6	6	1.33272e+06	0.976352	6	10.2293	998	112.346	6.39209
P19013	Keratin, type II cytoskeletal 4 OS=Homo sapiens GN=KRT4 PE=1 SV=4 - [K2C4_HUMAN]	38.9886	12.17	3	2	7	14	9.47995e+06	0.976277	2	3.5128	534	57.2498	6.60986
P62750	60S ribosomal protein L23a OS=Homo sapiens GN=RPL23A PE=1 SV=1 - [RL23A_HUMAN]	17.0065	14.1	1	3	3	6	2.26028e+06	0.974243	3	7.22608	156	17.6841	10.4478
Q99623	Prohibitin-2 OS=Homo sapiens GN=PHB2 PE=1 SV=2 - [PHB2_HUMAN]	5.50893	8.03	1	2	2	2	1.07271e+06	0.969869	2	5.06382	299	33.2759	9.83252
Q08211	ATP-dependent RNA helicase A OS=Homo sapiens GN=DHX9 PE=1 SV=4 - [DHX9_HUMAN]	23.2731	5.04	1	6	6	7	1.40139e+06	0.964484	6	8.11013	1270	140.869	6.84424
P07910	Heterogeneous nuclear ribonucleoproteins C1/C2 OS=Homo sapiens GN=HNRNPC PE=1 SV=4 - [HNRPC_HUMAN]	24.7515	12.42	4	4	4	6	3.605e+06	0.963499	4	8.31394	306	33.6495	5.08447
P84103	Serine/arginine-rich splicing factor 3 OS=Homo sapiens GN=SRSF3 PE=1 SV=1 - [SRSF3_HUMAN]	5.27458	15.85	1	2	2	2	2.05547e+06	0.955709	2	0.959157	164	19.3179	11.6489
P0DMV8	Heat shock 70 kDa protein 1A OS=Homo sapiens GN=HSPA1A PE=1 SV=1 - [HS71A_HUMAN]	35.7838	14.98	3	6	7	11	4.35247e+06	0.954883	5	11.0763	641	70.009	5.65576
P08238	Heat shock protein HSP 90-beta OS=Homo sapiens GN=HSP90AB1 PE=1 SV=4 - [HS90B_HUMAN]	89.9696	18.51	6	6	11	28	4.18803e+06	0.95391	6	13.6754	724	83.2121	5.03369
P47914	60S ribosomal protein L29 OS=Homo sapiens GN=RPL29 PE=1 SV=2 - [RL29_HUMAN]	3.41357	9.43	1	1	1	1	3.36251e+06	0.953604	1		159	17.7411	11.6636
P08727	Keratin, type I cytoskeletal 19 OS=Homo sapiens GN=KRT19 PE=1 SV=4 - [K1C19_HUMAN]	400.371	60	11	19	25	121	6.02662e+07	0.950145	37	4.06429	400	44.0791	5.13525
O14979	Heterogeneous nuclear ribonucleoprotein D-like OS=Homo sapiens GN=HNRNPDL PE=1 SV=3 - [HNRDL_HUMAN]	6.18176	1.9	1	1	1	2	662490	0.947573	1		420	46.4091	9.56885
P53621	Coatomer subunit alpha OS=Homo sapiens GN=COPA PE=1 SV=2 - [COPA_HUMAN]	6.22228	3.02	1	2	2	2	481780	0.94532	1		1224	138.258	7.66455
Q13155	Aminoacyl tRNA synthase complex-interacting multifunctional protein 2 OS=Homo sapiens GN=AIMP2 PE=1 SV=2 - [AIMP2_HUMAN]	3.59355	7.81	1	1	1	1	701838	0.944971	1		320	35.3263	8.22119
Q9BQE3	Tubulin alpha-1C chain OS=Homo sapiens GN=TUBA1C PE=1 SV=1 - [TBA1C_HUMAN]	112.499	30.07	8	10	10	32	1.0513e+07	0.943635	13	9.55896	449	49.8635	5.09717
P16520	Guanine nucleotide-binding protein G(I)/G(S)/G(T) subunit beta-3 OS=Homo sapiens GN=GNB3 PE=1 SV=1 - [GBB3_HUMAN]	3.01699	2.94	4	1	1	1	832803	0.942928	1		340	37.1969	5.66846
P17844	Probable ATP-dependent RNA helicase DDX5 OS=Homo sapiens GN=DDX5 PE=1 SV=1 - [DDX5_HUMAN]	11.3025	6.68	2	4	4	4	1.58265e+06	0.942642	4	7.83076	614	69.1047	8.92432
O60506	Heterogeneous nuclear ribonucleoprotein Q OS=Homo sapiens GN=SYNCRIP PE=1 SV=2 - [HNRPQ_HUMAN]	18.5817	5.3	1	1	3	6	1.31597e+06	0.939787	1		623	69.5596	8.5874
P42766	60S ribosomal protein L35 OS=Homo sapiens GN=RPL35 PE=1 SV=2 - [RL35_HUMAN]	6.90408	8.13	1	1	1	2	2.29555e+06	0.938827	1		123	14.5426	11.0483
P05787	Keratin, type II cytoskeletal 8 OS=Homo sapiens GN=KRT8 PE=1 SV=7 - [K2C8_HUMAN]	374.074	42.44	7	21	26	108	6.05378e+07	0.937511	31	5.15853	483	53.6711	5.59229
O75083	WD repeat-containing protein 1 OS=Homo sapiens GN=WDR1 PE=1 SV=4 - [WDR1_HUMAN]	2.60042	3.63	1	1	1	1	1.06653e+06	0.935017	1		606	66.1519	6.65381
P13489	Ribonuclease inhibitor OS=Homo sapiens GN=RNH1 PE=1 SV=2 - [RINI_HUMAN]	8.64618	6.51	1	2	2	2	618889	0.934396	2	14.3158	461	49.9411	4.81787
P13639	Elongation factor 2 OS=Homo sapiens GN=EEF2 PE=1 SV=4 - [EF2_HUMAN]	32.3184	9.44	1	6	6	11	2.34011e+06	0.933425	6	14.9269	858	95.277	6.82959
P62841	40S ribosomal protein S15 OS=Homo sapiens GN=RPS15 PE=1 SV=2 - [RS15_HUMAN]	6.54306	13.1	1	1	1	2	296132	0.933064	1		145	17.0292	10.3892
P61981	14-3-3 protein gamma OS=Homo sapiens GN=YWHAG PE=1 SV=2 - [1433G_HUMAN]	27.87	19.43	6	1	4	8	1.93148e+06	0.930105	1		247	28.2849	4.89404
Q9Y3I0	tRNA-splicing ligase RtcB homolog OS=Homo sapiens GN=RTCB PE=1 SV=1 - [RTCB_HUMAN]	2.02023	2.77	1	1	1	1	362596	0.92948	1		505	55.1749	7.2251
P11940	Polyadenylate-binding protein 1 OS=Homo sapiens GN=PABPC1 PE=1 SV=2 - [PABP1_HUMAN]	18.5423	8.02	3	4	4	5	991345	0.928167	3	4.98926	636	70.6259	9.49561
P09874	Poly [ADP-ribose] polymerase 1 OS=Homo sapiens GN=PARP1 PE=1 SV=4 - [PARP1_HUMAN]	3.26996	1.87	1	1	1	1	399607	0.926567	1		1014	113.012	8.88037
P83731	60S ribosomal protein L24 OS=Homo sapiens GN=RPL24 PE=1 SV=1 - [RL24_HUMAN]	5.36862	5.1	1	1	1	2	1.76701e+06	0.92548	1		157	17.7679	11.2534
P23396	40S ribosomal protein S3 OS=Homo sapiens GN=RPS3 PE=1 SV=2 - [RS3_HUMAN]	43.4627	28.4	1	7	7	12	3.52496e+06	0.925012	6	4.41415	243	26.6714	9.65674
P35579	Myosin-9 OS=Homo sapiens GN=MYH9 PE=1 SV=4 - [MYH9_HUMAN]	263.047	19.29	3	33	34	73	6.10614e+06	0.923767	39	10.6284	1960	226.392	5.60498
Q9BSJ8	Extended synaptotagmin-1 OS=Homo sapiens GN=ESYT1 PE=1 SV=1 - [ESYT1_HUMAN]	3.85617	1.09	1	1	1	1	296272	0.922588	1		1104	122.78	5.8335
P58107	Epiplakin OS=Homo sapiens GN=EPPK1 PE=1 SV=2 - [EPIPL_HUMAN]	64.995	12.18	1	6	9	20	1.96114e+06	0.921074	6	30.5281	5090	555.279	5.60498
Q9UGI8	Testin OS=Homo sapiens GN=TES PE=1 SV=1 - [TES_HUMAN]	6.79672	2.85	1	1	1	2	803602	0.920735	1		421	47.9639	7.6792
P18124	60S ribosomal protein L7 OS=Homo sapiens GN=RPL7 PE=1 SV=1 - [RL7_HUMAN]	29.9119	31.05	1	7	7	10	2.94427e+06	0.918713	7	12.0157	248	29.2072	10.6528
P04406	Glyceraldehyde-3-phosphate dehydrogenase OS=Homo sapiens GN=GAPDH PE=1 SV=3 - [G3P_HUMAN]	68.6018	38.51	1	8	8	23	1.08925e+07	0.917802	10	5.62167	335	36.0304	8.45557
Q00610	Clathrin heavy chain 1 OS=Homo sapiens GN=CLTC PE=1 SV=5 - [CLH1_HUMAN]	9.53634	1.97	1	3	3	3	540107	0.917722	2	67.1547	1675	191.493	5.69385
P40926	Malate dehydrogenase, mitochondrial OS=Homo sapiens GN=MDH2 PE=1 SV=3 - [MDHM_HUMAN]	9.7926	7.4	1	2	2	3	769313	0.91677	1		338	35.4807	8.67529
P07814	Bifunctional glutamate/proline--tRNA ligase OS=Homo sapiens GN=EPRS PE=1 SV=5 - [SYEP_HUMAN]	2.38109	0.6	1	1	1	1	343723	0.911651	1		1512	170.483	7.32764
P49411	Elongation factor Tu, mitochondrial OS=Homo sapiens GN=TUFM PE=1 SV=2 - [EFTU_HUMAN]	32.7402	14.6	1	5	5	9	2.33353e+06	0.910714	5	17.5008	452	49.5102	7.60596
P05783	Keratin, type I cytoskeletal 18 OS=Homo sapiens GN=KRT18 PE=1 SV=2 - [K1C18_HUMAN]	251.075	51.86	7	18	20	64	2.27208e+07	0.910558	26	8.81342	430	48.0285	5.45264
P39019	40S ribosomal protein S19 OS=Homo sapiens GN=RPS19 PE=1 SV=2 - [RS19_HUMAN]	18.9485	30.34	1	4	4	6	1.55597e+06	0.908107	4	4.75392	145	16.0505	10.3159
P05198	Eukaryotic translation initiation factor 2 subunit 1 OS=Homo sapiens GN=EIF2S1 PE=1 SV=3 - [IF2A_HUMAN]	4.12506	3.81	1	1	1	1	618560	0.905972	1		315	36.0894	5.08447
P08865	40S ribosomal protein SA OS=Homo sapiens GN=RPSA PE=1 SV=4 - [RSSA_HUMAN]	11.2995	7.12	1	2	2	3	1.6932e+06	0.905842	2	3.78391	295	32.8334	4.86865
P62913	60S ribosomal protein L11 OS=Homo sapiens GN=RPL11 PE=1 SV=2 - [RL11_HUMAN]	3.21069	5.06	1	1	1	1	1.31555e+06	0.904827	1		178	20.2396	9.59814
P29692	Elongation factor 1-delta OS=Homo sapiens GN=EEF1D PE=1 SV=5 - [EF1D_HUMAN]	27.178	12.81	1	2	2	7	2.91435e+06	0.904793	2	6.43719	281	31.1028	5.0083
P49368	T-complex protein 1 subunit gamma OS=Homo sapiens GN=CCT3 PE=1 SV=4 - [TCPG_HUMAN]	9.00216	8.26	1	3	3	3	686942	0.90469	3	6.86251	545	60.4953	6.49365
P39023	60S ribosomal protein L3 OS=Homo sapiens GN=RPL3 PE=1 SV=2 - [RL3_HUMAN]	5.22148	2.23	1	1	1	2	1.75444e+06	0.903585	1		403	46.0798	10.1841
O43390	Heterogeneous nuclear ribonucleoprotein R OS=Homo sapiens GN=HNRNPR PE=1 SV=1 - [HNRPR_HUMAN]	17.9124	5.37	1	1	3	6	1.59217e+06	0.901021	1		633	70.8993	8.1333
P60866	40S ribosomal protein S20 OS=Homo sapiens GN=RPS20 PE=1 SV=1 - [RS20_HUMAN]	2.9601	12.61	1	1	1	1	1.2271e+06	0.898525	1		119	13.3643	9.93506
Q96RQ3	Methylcrotonoyl-CoA carboxylase subunit alpha, mitochondrial OS=Homo sapiens GN=MCCC1 PE=1 SV=3 - [MCCA_HUMAN]	2.70794	1.52	1	1	1	1	356862	0.895627	1		725	80.4219	7.78174
P37802	Transgelin-2 OS=Homo sapiens GN=TAGLN2 PE=1 SV=3 - [TAGL2_HUMAN]	10.4603	12.56	2	2	2	3	1.1343e+06	0.895162	2	2.87788	199	22.3772	8.25049
P08729	Keratin, type II cytoskeletal 7 OS=Homo sapiens GN=KRT7 PE=1 SV=5 - [K2C7_HUMAN]	186.447	37.74	8	15	20	56	2.58452e+07	0.893789	19	5.01661	469	51.3543	5.47803
Q15691	Microtubule-associated protein RP/EB family member 1 OS=Homo sapiens GN=MAPRE1 PE=1 SV=3 - [MARE1_HUMAN]	10.3946	11.19	1	2	2	3	782132	0.892296	2	4.7974	268	29.9802	5.13525
P50991	T-complex protein 1 subunit delta OS=Homo sapiens GN=CCT4 PE=1 SV=4 - [TCPD_HUMAN]	5.82794	2.41	1	1	1	2	770802	0.891749	1		539	57.8878	7.82568
P62826	GTP-binding nuclear protein Ran OS=Homo sapiens GN=RAN PE=1 SV=3 - [RAN_HUMAN]	14.1494	16.67	1	3	3	5	1.8974e+06	0.890195	3	2.94101	216	24.4076	7.48877
P62269	40S ribosomal protein S18 OS=Homo sapiens GN=RPS18 PE=1 SV=3 - [RS18_HUMAN]	27.2521	30.92	1	5	5	8	1.90637e+06	0.889535	4	14.4079	152	17.7079	10.9897
P32322	Pyrroline-5-carboxylate reductase 1, mitochondrial OS=Homo sapiens GN=PYCR1 PE=1 SV=2 - [P5CR1_HUMAN]	4.19098	3.45	1	1	1	1	844778	0.887103	1		319	33.3396	7.60596
P55327	Tumor protein D52 OS=Homo sapiens GN=TPD52 PE=1 SV=2 - [TPD52_HUMAN]	8.04177	6.25	1	1	1	2	733634	0.885377	1		224	24.3122	4.83057
Q06830	Peroxiredoxin-1 OS=Homo sapiens GN=PRDX1 PE=1 SV=1 - [PRDX1_HUMAN]	21.4083	15.58	3	4	4	9	2.11528e+06	0.883777	4	9.80137	199	22.0963	8.1333
P26447	Protein S100-A4 OS=Homo sapiens GN=S100A4 PE=1 SV=1 - [S10A4_HUMAN]	5.32737	10.89	1	1	1	2	1.45811e+06	0.883506	1		101	11.7207	6.11279
P00558	Phosphoglycerate kinase 1 OS=Homo sapiens GN=PGK1 PE=1 SV=3 - [PGK1_HUMAN]	35.9457	23.5	2	6	6	11	2.5988e+06	0.883305	3	14.9147	417	44.5861	8.104
P10809	60 kDa heat shock protein, mitochondrial OS=Homo sapiens GN=HSPD1 PE=1 SV=2 - [CH60_HUMAN]	72.0973	19.37	1	8	8	21	3.00941e+06	0.881143	9	7.69139	573	61.0164	5.87158
P48444	Coatomer subunit delta OS=Homo sapiens GN=ARCN1 PE=1 SV=1 - [COPD_HUMAN]	3.15568	1.76	1	1	1	1	416469	0.880667	1		511	57.1741	6.21436
P04075	Fructose-bisphosphate aldolase A OS=Homo sapiens GN=ALDOA PE=1 SV=2 - [ALDOA_HUMAN]	62.5673	25.55	1	8	8	20	5.65301e+06	0.877371	8	7.79326	364	39.3953	8.08936
P68104	Elongation factor 1-alpha 1 OS=Homo sapiens GN=EEF1A1 PE=1 SV=1 - [EF1A1_HUMAN]	75.9188	21.21	3	8	8	22	1.10822e+07	0.874513	10	8.12237	462	50.1091	9.01221
P07437	Tubulin beta chain OS=Homo sapiens GN=TUBB PE=1 SV=2 - [TBB5_HUMAN]	101.366	33.56	9	3	11	25	6.55073e+06	0.866678	3	13.592	444	49.639	4.89404
P06733	Alpha-enolase OS=Homo sapiens GN=ENO1 PE=1 SV=2 - [ENOA_HUMAN]	55.8699	24.88	3	7	7	14	3.56299e+06	0.866039	8	6.72032	434	47.1393	7.38623
P02786	Transferrin receptor protein 1 OS=Homo sapiens GN=TFRC PE=1 SV=2 - [TFR1_HUMAN]	2.69565	1.71	1	1	1	1	518274	0.863875	1		760	84.8179	6.60986
P15311	Ezrin OS=Homo sapiens GN=EZR PE=1 SV=4 - [EZRI_HUMAN]	19.2229	8.19	4	5	5	8	1.03638e+06	0.858902	3	31.1418	586	69.3697	6.26514
P62937	Peptidyl-prolyl cis-trans isomerase A OS=Homo sapiens GN=PPIA PE=1 SV=2 - [PPIA_HUMAN]	24.4266	24.24	1	3	3	8	9.62876e+06	0.857968	4	4.04927	165	18.0009	7.81104
P42167	Lamina-associated polypeptide 2, isoforms beta/gamma OS=Homo sapiens GN=TMPO PE=1 SV=2 - [LAP2B_HUMAN]	8.44555	12.11	2	3	3	3	416566	0.85709	2	25.8496	454	50.6395	9.37842
P26641	Elongation factor 1-gamma OS=Homo sapiens GN=EEF1G PE=1 SV=3 - [EF1G_HUMAN]	8.89495	2.97	1	1	1	2	2.67778e+06	0.852244	1		437	50.0871	6.66846
P07900	Heat shock protein HSP 90-alpha OS=Homo sapiens GN=HSP90AA1 PE=1 SV=5 - [HS90A_HUMAN]	72.3706	15.57	3	4	9	22	4.19358e+06	0.851915	4	12.0118	732	84.6067	5.021
P04792	Heat shock protein beta-1 OS=Homo sapiens GN=HSPB1 PE=1 SV=2 - [HSPB1_HUMAN]	33.5206	33.17	1	4	4	8	6.36407e+06	0.848705	4	12.3765	205	22.7685	6.40479
P62753	40S ribosomal protein S6 OS=Homo sapiens GN=RPS6 PE=1 SV=1 - [RS6_HUMAN]	9.07121	12.45	1	3	3	3	1.76372e+06	0.847178	3	6.9497	249	28.663	10.8433
P00966	Argininosuccinate synthase OS=Homo sapiens GN=ASS1 PE=1 SV=2 - [ASSY_HUMAN]	7.28214	6.8	1	2	2	2	941568	0.847076	2	30.3498	412	46.501	8.01611
P60842	Eukaryotic initiation factor 4A-I OS=Homo sapiens GN=EIF4A1 PE=1 SV=1 - [IF4A1_HUMAN]	46.7424	16.26	2	4	5	12	3.56201e+06	0.842202	4	4.24826	406	46.1246	5.47803
P67809	Nuclease-sensitive element-binding protein 1 OS=Homo sapiens GN=YBX1 PE=1 SV=3 - [YBOX1_HUMAN]	56.6228	36.42	1	5	5	13	4.19759e+06	0.841079	6	24.6478	324	35.9027	9.87646
P07737	Profilin-1 OS=Homo sapiens GN=PFN1 PE=1 SV=2 - [PROF1_HUMAN]	18.5761	26.43	1	4	4	6	1.8264e+06	0.837519	4	21.5579	140	15.0446	8.26514
Q09666	Neuroblast differentiation-associated protein AHNAK OS=Homo sapiens GN=AHNAK PE=1 SV=2 - [AHNK_HUMAN]	22.5123	9.08	1	9	11	14	2.5341e+06	0.834455	8	21.6653	5890	628.699	6.15088
Q9NR30	Nucleolar RNA helicase 2 OS=Homo sapiens GN=DDX21 PE=1 SV=5 - [DDX21_HUMAN]	5.32221	2.55	1	2	2	2	639085	0.830763	1		783	87.2904	9.27588
P62158	Calmodulin OS=Homo sapiens GN=CALM1 PE=1 SV=2 - [CALM_HUMAN]	10.1605	22.15	1	2	2	3	2.11637e+06	0.819512	3	9.41685	149	16.8268	4.22119
P15531	Nucleoside diphosphate kinase A OS=Homo sapiens GN=NME1 PE=1 SV=1 - [NDKA_HUMAN]	7.83437	19.08	3	2	2	3	1.6288e+06	0.816194	1		152	17.1377	6.18896
Q00325	Phosphate carrier protein, mitochondrial OS=Homo sapiens GN=SLC25A3 PE=1 SV=2 - [MPCP_HUMAN]	6.41698	3.31	1	1	1	2	884742	0.813905	1		362	40.0687	9.37842
P14618	Pyruvate kinase PKM OS=Homo sapiens GN=PKM PE=1 SV=4 - [KPYM_HUMAN]	46.9559	18.46	2	8	8	16	4.68425e+06	0.809141	10	6.33286	531	57.9	7.84033
P35659	Protein DEK OS=Homo sapiens GN=DEK PE=1 SV=1 - [DEK_HUMAN]	2.11335	2.4	1	1	1	1	411683	0.807488	1		375	42.6479	8.55811
Q15366	Poly(rC)-binding protein 2 OS=Homo sapiens GN=PCBP2 PE=1 SV=1 - [PCBP2_HUMAN]	26.5899	11.23	3	1	3	7	1.87923e+06	0.805526	1		365	38.5556	6.78564
P68371	Tubulin beta-4B chain OS=Homo sapiens GN=TUBB4B PE=1 SV=1 - [TBB4B_HUMAN]	86.7186	24.04	9	1	9	22	5.47687e+06	0.805359	1		445	49.799	4.89404
Q9P2J5	Leucine--tRNA ligase, cytoplasmic OS=Homo sapiens GN=LARS PE=1 SV=2 - [SYLC_HUMAN]	8.54284	4.08	1	2	2	2	488652	0.797152	2	2.92821	1176	134.379	7.29834
P62081	40S ribosomal protein S7 OS=Homo sapiens GN=RPS7 PE=1 SV=1 - [RS7_HUMAN]	9.23925	15.98	1	3	3	3	2.00917e+06	0.795543	2	52.7722	194	22.1133	10.0962
Q12931	Heat shock protein 75 kDa, mitochondrial OS=Homo sapiens GN=TRAP1 PE=1 SV=3 - [TRAP1_HUMAN]	7.50623	5.11	1	2	3	3	1.636e+06	0.793174	2	19.2554	704	80.0597	8.20654
Q15427	Splicing factor 3B subunit 4 OS=Homo sapiens GN=SF3B4 PE=1 SV=1 - [SF3B4_HUMAN]	3.51534	3.3	1	1	1	1	302850	0.782657	1		424	44.3571	8.55811
P00338	L-lactate dehydrogenase A chain OS=Homo sapiens GN=LDHA PE=1 SV=2 - [LDHA_HUMAN]	12.4198	9.04	1	3	3	4	1.37969e+06	0.774491	3	22.0687	332	36.6654	8.26514
P12532	Creatine kinase U-type, mitochondrial OS=Homo sapiens GN=CKMT1A PE=1 SV=1 - [KCRU_HUMAN]	32.4392	18.94	1	6	6	12	3.2029e+06	0.773451	6	4.89184	417	47.0072	8.33838
Q04837	Single-stranded DNA-binding protein, mitochondrial OS=Homo sapiens GN=SSBP1 PE=1 SV=1 - [SSBP_HUMAN]	2.69993	5.41	1	1	1	1	879063	0.773446	1		148	17.249	9.59814
P07355	Annexin A2 OS=Homo sapiens GN=ANXA2 PE=1 SV=2 - [ANXA2_HUMAN]	19.857	11.21	2	3	3	6	1.12285e+06	0.767624	2	4.15202	339	38.5798	7.75244
P84098	60S ribosomal protein L19 OS=Homo sapiens GN=RPL19 PE=1 SV=1 - [RL19_HUMAN]	3.62072	9.18	1	1	1	1	948290	0.755078	1		196	23.4512	11.4731
Q6NVV1	Putative 60S ribosomal protein L13a protein RPL13AP3 OS=Homo sapiens GN=RPL13AP3 PE=5 SV=1 - [R13P3_HUMAN]	6.00057	22.55	2	2	2	2	2.15559e+06	0.74389	2	4.84348	102	12.1269	10.7554
Q7Z5L9	Interferon regulatory factor 2-binding protein 2 OS=Homo sapiens GN=IRF2BP2 PE=1 SV=2 - [I2BP2_HUMAN]	3.20812	3.41	1	1	1	1	304650	0.717417	1		587	60.9867	8.68994
P13010	X-ray repair cross-complementing protein 5 OS=Homo sapiens GN=XRCC5 PE=1 SV=3 - [XRCC5_HUMAN]	5.76529	3.69	1	2	2	2	569718	0.681043	2	41.9425	732	82.6523	5.80811
P26196	Probable ATP-dependent RNA helicase DDX6 OS=Homo sapiens GN=DDX6 PE=1 SV=2 - [DDX6_HUMAN]	4.35045	4.97	1	1	1	1	380364	0.661034	1		483	54.3823	8.66064
P00367	Glutamate dehydrogenase 1, mitochondrial OS=Homo sapiens GN=GLUD1 PE=1 SV=2 - [DHE3_HUMAN]	3.11784	1.97	2	1	1	1	339873	0.629291	1		558	61.3592	7.79639
Q9NZB2	Constitutive coactivator of PPAR-gamma-like protein 1 OS=Homo sapiens GN=FAM120A PE=1 SV=2 - [F120A_HUMAN]	3.5275	1.16	1	1	1	1	296865	0.628694	1		1118	121.811	8.88037
O15523	ATP-dependent RNA helicase DDX3Y OS=Homo sapiens GN=DDX3Y PE=1 SV=2 - [DDX3Y_HUMAN]	6.28026	1.52	2	1	1	2	197299	0.625896	1		660	73.1081	7.54736
Q00341	Vigilin OS=Homo sapiens GN=HDLBP PE=1 SV=2 - [VIGLN_HUMAN]	3.55106	1.42	1	1	1	1	215288	0.620611	1		1268	141.368	6.87354
P35908	Keratin, type II cytoskeletal 2 epidermal OS=Homo sapiens GN=KRT2 PE=1 SV=2 - [K22E_HUMAN]	106.324	26.76	6	9	15	30	3.0718e+07	0.151134	1		639	65.3932	8.00146
P01023	Alpha-2-macroglobulin OS=Homo sapiens GN=A2M PE=1 SV=3 - [A2MG_HUMAN]	2.15207	0.61	2	1	1	1	1.34067e+06				1474	163.188	6.45557
Q562R1	Beta-actin-like protein 2 OS=Homo sapiens GN=ACTBL2 PE=1 SV=2 - [ACTBL_HUMAN]	60.1756	12.77	1	1	4	19	6.70689e+07				376	41.976	5.59229
P02768	Serum albumin OS=Homo sapiens GN=ALB PE=1 SV=2 - [ALBU_HUMAN]	28.1783	3.61	1	3	3	8	4.00914e+07				609	69.3215	6.27783
P02656	Apolipoprotein C-III OS=Homo sapiens GN=APOC3 PE=1 SV=1 - [APOC3_HUMAN]	3.90255	16.16	1	1	1	1	93343.6				99	10.8455	5.41455
P02747	Complement C1q subcomponent subunit C OS=Homo sapiens GN=C1QC PE=1 SV=3 - [C1QC_HUMAN]	3.96141	7.35	1	1	1	1	2.46485e+06				245	25.7571	8.41162
P12111	Collagen alpha-3(VI) chain OS=Homo sapiens GN=COL6A3 PE=1 SV=5 - [CO6A3_HUMAN]	0	0.6	1	1	1	1	2.17191e+06				3177	343.457	6.68311
P53618	Coatomer subunit beta OS=Homo sapiens GN=COPB1 PE=1 SV=3 - [COPB_HUMAN]	3.48594	1.15	1	1	1	1	94582.3				953	107.074	6.04932
P25685	DnaJ homolog subfamily B member 1 OS=Homo sapiens GN=DNAJB1 PE=1 SV=4 - [DNJB1_HUMAN]	3.20632	2.94	1	1	1	1	583989				340	38.0204	8.63135
Q03001	Dystonin OS=Homo sapiens GN=DST PE=1 SV=4 - [DYST_HUMAN]	0	0.53	1	1	1	1					7570	860.127	5.24951
P07954	Fumarate hydratase, mitochondrial OS=Homo sapiens GN=FH PE=1 SV=3 - [FUMH_HUMAN]	3.81932	2.75	1	1	1	1	342435				510	54.6022	8.76318
P0C0S5	Histone H2A.Z OS=Homo sapiens GN=H2AFZ PE=1 SV=2 - [H2AZ_HUMAN]	12.8598	13.28	2	1	2	6	7.09497e+06				128	13.5446	10.5796
Q04637	Eukaryotic translation initiation factor 4 gamma 1 OS=Homo sapiens GN=EIF4G1 PE=1 SV=4 - [IF4G1_HUMAN]	6.30181	1.94	1	2	2	2	677483				1599	175.382	5.32568
P13645	Keratin, type I cytoskeletal 10 OS=Homo sapiens GN=KRT10 PE=1 SV=6 - [K1C10_HUMAN]	103.778	25.86	13	12	16	35	2.08323e+07				584	58.7917	5.21143
P02533	Keratin, type I cytoskeletal 14 OS=Homo sapiens GN=KRT14 PE=1 SV=4 - [K1C14_HUMAN]	49.7896	16.31	12	2	8	20	1.56424e+07				472	51.5294	5.16064
P35527	Keratin, type I cytoskeletal 9 OS=Homo sapiens GN=KRT9 PE=1 SV=3 - [K1C9_HUMAN]	80.6235	23.27	1	8	9	22	9.11631e+06				623	62.0268	5.23682
P04264	Keratin, type II cytoskeletal 1 OS=Homo sapiens GN=KRT1 PE=1 SV=6 - [K2C1_HUMAN]	194.841	49.07	1	25	29	56	3.35476e+07				644	65.999	8.11865
P04259	Keratin, type II cytoskeletal 6B OS=Homo sapiens GN=KRT6B PE=1 SV=5 - [K2C6B_HUMAN]	46.6001	10.46	9	1	7	15	2.51176e+07				564	60.0303	8.00146
O76015	Keratin, type I cuticular Ha8 OS=Homo sapiens GN=KRT38 PE=1 SV=3 - [KRT38_HUMAN]	14.3159	3.95	7	1	2	6	1.74003e+07				456	50.4474	4.84326
P07195	L-lactate dehydrogenase B chain OS=Homo sapiens GN=LDHB PE=1 SV=2 - [LDHB_HUMAN]	6.51751	4.79	1	1	1	2	524163				334	36.6151	6.04932
Q7Z4T9	Protein MAATS1 OS=Homo sapiens GN=MAATS1 PE=1 SV=2 - [MAAT1_HUMAN]	2.09007	1.33	1	1	1	1	546476				603	70.9544	7.73779
O00159	Unconventional myosin-Ic OS=Homo sapiens GN=MYO1C PE=1 SV=4 - [MYO1C_HUMAN]	4.82175	1.79	1	2	2	2	361472				1063	121.606	9.40771
Q9H009	Nascent polypeptide-associated complex subunit alpha-2 OS=Homo sapiens GN=NACA2 PE=1 SV=1 - [NACA2_HUMAN]	10.5537	6.98	1	1	1	3	893883				215	23.2088	4.729
Q13765	Nascent polypeptide-associated complex subunit alpha OS=Homo sapiens GN=NACA PE=1 SV=1 - [NACA_HUMAN]	10.5537	6.98	2	1	1	2	893883				215	23.3697	4.56396
Q15233	Non-POU domain-containing octamer-binding protein OS=Homo sapiens GN=NONO PE=1 SV=4 - [NONO_HUMAN]	7.93951	4.88	1	1	2	3	1.30667e+06				471	54.1973	8.95361
O00567	Nucleolar protein 56 OS=Homo sapiens GN=NOP56 PE=1 SV=4 - [NOP56_HUMAN]	0	2.19	1	1	1	1	239343				594	66.0087	9.18799
P36957	Dihydrolipoyllysine-residue succinyltransferase component of 2-oxoglutarate dehydrogenase complex, mitochondrial OS=Homo sapiens GN=DLST PE=1 SV=4 - [ODO2_HUMAN]	13.2672	3.09	1	1	1	3	721422				453	48.7245	8.95361
Q9UQ80	Proliferation-associated protein 2G4 OS=Homo sapiens GN=PA2G4 PE=1 SV=3 - [PA2G4_HUMAN]	7.99061	8.88	1	2	2	2	1.21113e+06				394	43.7592	6.55127
P35232	Prohibitin OS=Homo sapiens GN=PHB PE=1 SV=1 - [PHB_HUMAN]	3.12675	4.41	1	1	1	1	676730				272	29.7859	5.75732
Q9UMS4	Pre-mRNA-processing factor 19 OS=Homo sapiens GN=PRPF19 PE=1 SV=1 - [PRP19_HUMAN]	6.34252	2.18	1	1	1	2	923459				504	55.1463	6.60986
P22695	Cytochrome b-c1 complex subunit 2, mitochondrial OS=Homo sapiens GN=UQCRC2 PE=1 SV=3 - [QCR2_HUMAN]	2.65218	4.64	1	1	1	1	733194				453	48.4129	8.63135
P61026	Ras-related protein Rab-10 OS=Homo sapiens GN=RAB10 PE=1 SV=1 - [RAB10_HUMAN]	9.11919	11	25	2	2	3	2.12543e+06				200	22.5266	8.38232
Q9UHD8	Septin-9 OS=Homo sapiens GN=SEPT9 PE=1 SV=2 - [SEPT9_HUMAN]	2.45919	1.71	1	1	1	1	479549				586	65.3608	8.96826
Q9Y5B9	FACT complex subunit SPT16 OS=Homo sapiens GN=SUPT16H PE=1 SV=1 - [SP16H_HUMAN]	3.98918	1.15	1	1	1	1	444613				1047	119.838	5.65576
P24752	Acetyl-CoA acetyltransferase, mitochondrial OS=Homo sapiens GN=ACAT1 PE=1 SV=1 - [THIL_HUMAN]	4.06265	2.81	1	1	1	1	777359				427	45.1706	8.85107
P07477	Trypsin-1 OS=Homo sapiens GN=PRSS1 PE=1 SV=1 - [TRY1_HUMAN]	5.8752	4.05	1	1	1	2	1.74739e+07				247	26.5411	6.50732
O14980	Exportin-1 OS=Homo sapiens GN=XPO1 PE=1 SV=1 - [XPO1_HUMAN]	4.55848	1.77	1	1	1	1	2.76776e+06				1071	123.306	6.06201

## Sheet: HER2_IP_chromatin_628
Accession	Description	Score	Coverage	# Proteins	# Unique Peptides	# Peptides	# PSMs	Area	Heavy/Light	Heavy/Light Count	Heavy/Light Variability [%]	# AAs	MW [kDa]	calc. pI
P49327	Fatty acid synthase OS=Homo sapiens GN=FASN PE=1 SV=3 - [FAS_HUMAN]	1200.12	47.55	2	87	87	353	4.63889e+07	0.857971	119	7.85975	2511	273.254	6.44287
P04626	Receptor tyrosine-protein kinase erbB-2 OS=Homo sapiens GN=ERBB2 PE=1 SV=1 - [ERBB2_HUMAN]	761.198	26.22	6	28	29	203	2.73182e+08	0.984772	58	11.2064	1255	137.821	5.90967
Q09666	Neuroblast differentiation-associated protein AHNAK OS=Homo sapiens GN=AHNAK PE=1 SV=2 - [AHNK_HUMAN]	702.738	47.71	1	127	130	234	1.62816e+07	0.772684	118	13.8779	5890	628.699	6.15088
P08238	Heat shock protein HSP 90-beta OS=Homo sapiens GN=HSP90AB1 PE=1 SV=4 - [HS90B_HUMAN]	529.976	40.33	4	12	30	149	4.90003e+07	1.16153	22	8.81589	724	83.2121	5.03369
P07437	Tubulin beta chain OS=Homo sapiens GN=TUBB PE=1 SV=2 - [TBB5_HUMAN]	517.749	50.45	4	6	20	132	4.962e+07	1.39129	14	8.07884	444	49.639	4.89404
P07900	Heat shock protein HSP 90-alpha OS=Homo sapiens GN=HSP90AA1 PE=1 SV=5 - [HS90A_HUMAN]	499.989	40.57	6	17	31	140	4.92792e+07	1.19239	21	6.28503	732	84.6067	5.021
P15311	Ezrin OS=Homo sapiens GN=EZR PE=1 SV=4 - [EZRI_HUMAN]	480.675	43.86	3	18	27	133	5.15481e+07	1.1412	29	7.61405	586	69.3697	6.26514
P68371	Tubulin beta-4B chain OS=Homo sapiens GN=TUBB4B PE=1 SV=1 - [TBB4B_HUMAN]	479.932	50.34	5	5	19	125	4.34526e+07	1.28992	10	13.1204	445	49.799	4.89404
O00429	Dynamin-1-like protein OS=Homo sapiens GN=DNM1L PE=1 SV=2 - [DNM1L_HUMAN]	446.006	58.56	1	33	33	110	1.76299e+07	0.711249	42	9.94861	736	81.8261	6.81494
P68363	Tubulin alpha-1B chain OS=Homo sapiens GN=TUBA1B PE=1 SV=1 - [TBA1B_HUMAN]	428.126	50.11	8	5	18	118	6.75985e+07	1.39655	9	6.65959	451	50.1196	5.05908
P60709	Actin, cytoplasmic 1 OS=Homo sapiens GN=ACTB PE=1 SV=1 - [ACTB_HUMAN]	419.346	53.07	7	7	16	118	1.99604e+08	0.892689	14	4.68363	375	41.7097	5.47803
P68366	Tubulin alpha-4A chain OS=Homo sapiens GN=TUBA4A PE=1 SV=1 - [TBA4A_HUMAN]	326.873	41.29	4	3	16	96	5.97539e+07	1.912	1		448	49.8924	5.05908
P11142	Heat shock cognate 71 kDa protein OS=Homo sapiens GN=HSPA8 PE=1 SV=1 - [HSP7C_HUMAN]	325.809	38.7	2	23	26	91	2.9726e+07	1.0608	33	10.1012	646	70.8542	5.51611
P04264	Keratin, type II cytoskeletal 1 OS=Homo sapiens GN=KRT1 PE=1 SV=6 - [K2C1_HUMAN]	310.563	50	2	30	33	89	9.67564e+07	0.0576129	2	199.055	644	65.999	8.11865
P35241	Radixin OS=Homo sapiens GN=RDX PE=1 SV=1 - [RADI_HUMAN]	281.502	36.36	2	15	24	81	4.61729e+07	1.01513	16	14.5635	583	68.5214	6.3667
P68133	Actin, alpha skeletal muscle OS=Homo sapiens GN=ACTA1 PE=1 SV=1 - [ACTS_HUMAN]	280.116	33.95	4	2	11	86	1.0335e+08	0.883828	4	9.44093	377	42.0239	5.38916
O00159	Unconventional myosin-Ic OS=Homo sapiens GN=MYO1C PE=1 SV=4 - [MYO1C_HUMAN]	252.638	34.9	1	30	30	77	1.10356e+07	0.905342	36	8.24022	1063	121.606	9.40771
P07355	Annexin A2 OS=Homo sapiens GN=ANXA2 PE=1 SV=2 - [ANXA2_HUMAN]	207.441	52.51	2	17	17	54	1.44695e+07	1.15673	21	9.24848	339	38.5798	7.75244
P13645	Keratin, type I cytoskeletal 10 OS=Homo sapiens GN=KRT10 PE=1 SV=6 - [K1C10_HUMAN]	205.049	45.21	13	22	25	70	5.89222e+07	0.0421751	2	40.9799	584	58.7917	5.21143
P46940	Ras GTPase-activating-like protein IQGAP1 OS=Homo sapiens GN=IQGAP1 PE=1 SV=1 - [IQGA1_HUMAN]	194.105	25.41	2	27	29	56	9.65825e+06	1.06027	27	6.71279	1657	189.134	6.48096
P04406	Glyceraldehyde-3-phosphate dehydrogenase OS=Homo sapiens GN=GAPDH PE=1 SV=3 - [G3P_HUMAN]	185.117	58.81	2	13	13	50	2.19609e+07	1.19773	17	5.21041	335	36.0304	8.45557
P35527	Keratin, type I cytoskeletal 9 OS=Homo sapiens GN=KRT9 PE=1 SV=3 - [K1C9_HUMAN]	173.651	52.81	1	21	21	45	2.41295e+07	0.126539	1		623	62.0268	5.23682
P13639	Elongation factor 2 OS=Homo sapiens GN=EEF2 PE=1 SV=4 - [EF2_HUMAN]	159.306	32.87	2	23	23	55	9.62733e+06	1.04928	28	14.2302	858	95.277	6.82959
P04792	Heat shock protein beta-1 OS=Homo sapiens GN=HSPB1 PE=1 SV=2 - [HSPB1_HUMAN]	154.967	61.95	1	10	10	40	3.83358e+07	0.989455	13	5.84411	205	22.7685	6.40479
P35908	Keratin, type II cytoskeletal 2 epidermal OS=Homo sapiens GN=KRT2 PE=1 SV=2 - [K22E_HUMAN]	147.183	42.57	4	16	20	39	6.87416e+07	0.147123	2	243.954	639	65.3932	8.00146
P04075	Fructose-bisphosphate aldolase A OS=Homo sapiens GN=ALDOA PE=1 SV=2 - [ALDOA_HUMAN]	142.522	38.74	1	12	12	40	1.8017e+07	1.12383	13	10.7445	364	39.3953	8.08936
P68104	Elongation factor 1-alpha 1 OS=Homo sapiens GN=EEF1A1 PE=1 SV=1 - [EF1A1_HUMAN]	142.443	30.74	3	11	11	43	3.13358e+07	1.12637	16	4.73608	462	50.1091	9.01221
Q7KZF4	Staphylococcal nuclease domain-containing protein 1 OS=Homo sapiens GN=SND1 PE=1 SV=1 - [SND1_HUMAN]	135.851	30.22	1	21	21	39	4.4022e+06	1.04301	24	9.20529	910	101.934	7.1665
P02786	Transferrin receptor protein 1 OS=Homo sapiens GN=TFRC PE=1 SV=2 - [TFR1_HUMAN]	135.497	29.74	1	17	17	37	1.00715e+07	0.956626	21	13.9001	760	84.8179	6.60986
P06733	Alpha-enolase OS=Homo sapiens GN=ENO1 PE=1 SV=2 - [ENOA_HUMAN]	133.127	38.48	3	14	14	32	7.99169e+06	1.215	17	5.21455	434	47.1393	7.38623
Q9C005	Protein dpy-30 homolog OS=Homo sapiens GN=DPY30 PE=1 SV=1 - [DPY30_HUMAN]	131.985	58.59	1	5	5	39	1.12089e+07	0.891257	8	4.75507	99	11.2428	4.88135
P08779	Keratin, type I cytoskeletal 16 OS=Homo sapiens GN=KRT16 PE=1 SV=4 - [K1C16_HUMAN]	126.588	46.72	11	11	17	36	3.55326e+07				473	51.2362	5.04639
Q13268	Dehydrogenase/reductase SDR family member 2, mitochondrial OS=Homo sapiens GN=DHRS2 PE=1 SV=4 - [DHRS2_HUMAN]	126.155	37.86	1	9	9	38	1.64601e+07	1.18609	12	6.10349	280	29.9077	9.01221
O43707	Alpha-actinin-4 OS=Homo sapiens GN=ACTN4 PE=1 SV=2 - [ACTN4_HUMAN]	121.635	25.69	3	16	16	34	4.92436e+06	0.79358	18	13.1769	911	104.788	5.43994
P10809	60 kDa heat shock protein, mitochondrial OS=Homo sapiens GN=HSPD1 PE=1 SV=2 - [CH60_HUMAN]	120.225	30.19	1	14	14	36	4.65123e+06	1.33515	16	10.034	573	61.0164	5.87158
P55060	Exportin-2 OS=Homo sapiens GN=CSE1L PE=1 SV=3 - [XPO2_HUMAN]	115.619	25.54	1	20	20	36	9.14093e+06	0.8811	19	8.66924	971	110.346	5.77002
P0DMV8	Heat shock 70 kDa protein 1A OS=Homo sapiens GN=HSPA1A PE=1 SV=1 - [HS71A_HUMAN]	113.33	30.42	2	15	17	33	1.96168e+07	1.00282	16	10.9704	641	70.009	5.65576
P49411	Elongation factor Tu, mitochondrial OS=Homo sapiens GN=TUFM PE=1 SV=2 - [EFTU_HUMAN]	113.202	33.41	1	11	11	31	8.93824e+06	1.05984	14	15.3085	452	49.5102	7.60596
P50395	Rab GDP dissociation inhibitor beta OS=Homo sapiens GN=GDI2 PE=1 SV=2 - [GDIB_HUMAN]	110.376	32.36	2	14	14	34	4.24386e+06	1.60463	14	9.17589	445	50.6309	6.46826
Q9H4G0	Band 4.1-like protein 1 OS=Homo sapiens GN=EPB41L1 PE=1 SV=2 - [E41L1_HUMAN]	109.343	25.65	1	16	16	33	8.95526e+06	0.921831	17	3.68028	881	98.4422	5.61768
P11021	78 kDa glucose-regulated protein OS=Homo sapiens GN=HSPA5 PE=1 SV=2 - [GRP78_HUMAN]	108.867	29.82	2	14	16	31	7.83477e+06	0.999417	13	13.6863	654	72.2884	5.16064
P23396	40S ribosomal protein S3 OS=Homo sapiens GN=RPS3 PE=1 SV=2 - [RS3_HUMAN]	103.246	49.79	1	11	11	31	1.56604e+07	0.897203	12	15.7982	243	26.6714	9.65674
P14618	Pyruvate kinase PKM OS=Homo sapiens GN=PKM PE=1 SV=4 - [KPYM_HUMAN]	102.531	32.77	2	12	12	30	9.08827e+06	1.2782	13	11.4966	531	57.9	7.84033
Q58FF8	Putative heat shock protein HSP 90-beta 2 OS=Homo sapiens GN=HSP90AB2P PE=1 SV=2 - [H90B2_HUMAN]	101.585	22.05	1	1	8	30	3.94416e+07				381	44.3211	4.84326
Q16543	Hsp90 co-chaperone Cdc37 OS=Homo sapiens GN=CDC37 PE=1 SV=1 - [CDC37_HUMAN]	101.356	37.3	1	12	12	30	1.31219e+07	1.35273	13	8.30931	378	44.44	5.24951
P05023	Sodium/potassium-transporting ATPase subunit alpha-1 OS=Homo sapiens GN=ATP1A1 PE=1 SV=1 - [AT1A1_HUMAN]	99.795	21.7	6	15	15	29	4.89778e+06	1.06985	15	8.20756	1023	112.824	5.49072
P05787	Keratin, type II cytoskeletal 8 OS=Homo sapiens GN=KRT8 PE=1 SV=7 - [K2C8_HUMAN]	99.1781	26.92	9	10	14	28	1.40174e+07	1.14766	11	13.4478	483	53.6711	5.59229
P25705	ATP synthase subunit alpha, mitochondrial OS=Homo sapiens GN=ATP5A1 PE=1 SV=1 - [ATPA_HUMAN]	98.7761	27.85	1	12	12	27	7.16685e+06	1.17217	12	4.03445	553	59.7136	9.12939
P32322	Pyrroline-5-carboxylate reductase 1, mitochondrial OS=Homo sapiens GN=PYCR1 PE=1 SV=2 - [P5CR1_HUMAN]	97.6756	36.99	1	9	9	32	1.09215e+07	1.00423	13	17.5419	319	33.3396	7.60596
Q01970	1-phosphatidylinositol 4,5-bisphosphate phosphodiesterase beta-3 OS=Homo sapiens GN=PLCB3 PE=1 SV=2 - [PLCB3_HUMAN]	97.4534	20.91	1	16	16	28	2.50463e+06	1.0636	13	14.3662	1234	138.713	5.89697
Q562R1	Beta-actin-like protein 2 OS=Homo sapiens GN=ACTBL2 PE=1 SV=2 - [ACTBL_HUMAN]	97.1605	14.1	1	1	4	29	1.62288e+08				376	41.976	5.59229
P62269	40S ribosomal protein S18 OS=Homo sapiens GN=RPS18 PE=1 SV=3 - [RS18_HUMAN]	94.7753	48.68	1	9	9	28	1.30208e+07	0.958264	11	11.2492	152	17.7079	10.9897
P31946	14-3-3 protein beta/alpha OS=Homo sapiens GN=YWHAB PE=1 SV=3 - [1433B_HUMAN]	93.0317	47.97	3	5	10	26	9.06934e+06	0.992459	6	14.0272	246	28.0648	4.83057
Q15599	Na(+)/H(+) exchange regulatory cofactor NHE-RF2 OS=Homo sapiens GN=SLC9A3R2 PE=1 SV=2 - [NHRF2_HUMAN]	92.8217	43.62	1	11	11	39	1.16463e+07	0.997442	16	12.9188	337	37.391	7.92822
Q6P1M3	Lethal(2) giant larvae protein homolog 2 OS=Homo sapiens GN=LLGL2 PE=1 SV=2 - [L2GL2_HUMAN]	92.5749	20.69	1	15	15	26	6.78306e+06	0.909915	15	11.9967	1020	113.377	7.51807
P04259	Keratin, type II cytoskeletal 6B OS=Homo sapiens GN=KRT6B PE=1 SV=5 - [K2C6B_HUMAN]	90.0535	26.95	8	1	15	27	3.96814e+07				564	60.0303	8.00146
Q9C0C2	182 kDa tankyrase-1-binding protein OS=Homo sapiens GN=TNKS1BP1 PE=1 SV=4 - [TB182_HUMAN]	86.7627	13.48	1	14	14	26	2.99423e+06	0.840895	14	17.7424	1729	181.685	4.85596
P00558	Phosphoglycerate kinase 1 OS=Homo sapiens GN=PGK1 PE=1 SV=3 - [PGK1_HUMAN]	85.1957	33.81	2	11	11	24	1.10105e+07	1.08618	11	6.13804	417	44.5861	8.104
P02538	Keratin, type II cytoskeletal 6A OS=Homo sapiens GN=KRT6A PE=1 SV=3 - [K2C6A_HUMAN]	85.1102	26.95	8	2	15	25	3.40203e+07				564	60.0083	8.00146
P02533	Keratin, type I cytoskeletal 14 OS=Homo sapiens GN=KRT14 PE=1 SV=4 - [K1C14_HUMAN]	82.116	29.03	11	3	11	24	3.55326e+07				472	51.5294	5.16064
Q9UGT4	Sushi domain-containing protein 2 OS=Homo sapiens GN=SUSD2 PE=1 SV=1 - [SUSD2_HUMAN]	81.5963	8.64	1	4	4	18	7.76686e+06	1.0398	6	7.37644	822	90.1497	6.27783
P08727	Keratin, type I cytoskeletal 19 OS=Homo sapiens GN=KRT19 PE=1 SV=4 - [K1C19_HUMAN]	78.0383	38	10	11	14	22	1.78644e+07	1.26944	12	25.5784	400	44.0791	5.13525
P38646	Stress-70 protein, mitochondrial OS=Homo sapiens GN=HSPA9 PE=1 SV=2 - [GRP75_HUMAN]	77.7926	26.51	1	13	13	20	6.23413e+06	1.14547	11	6.70816	679	73.6348	6.16357
Q9HCY8	Protein S100-A14 OS=Homo sapiens GN=S100A14 PE=1 SV=1 - [S10AE_HUMAN]	77.4584	44.23	1	5	5	19	8.67756e+06	1.07397	8	12.8755	104	11.6548	5.23682
Q9H4M9	EH domain-containing protein 1 OS=Homo sapiens GN=EHD1 PE=1 SV=2 - [EHD1_HUMAN]	75.9261	26.78	1	11	11	21	5.88534e+06	1.21346	12	22.0162	534	60.5887	6.82959
P53396	ATP-citrate synthase OS=Homo sapiens GN=ACLY PE=1 SV=3 - [ACLY_HUMAN]	75.5127	18.71	1	16	16	25	2.58797e+06	1.01116	13	11.0776	1101	120.762	7.32764
P09110	3-ketoacyl-CoA thiolase, peroxisomal OS=Homo sapiens GN=ACAA1 PE=1 SV=2 - [THIK_HUMAN]	74.8654	29.48	1	9	9	25	3.66965e+06	1.002	11	7.70458	424	44.2639	8.44092
P00533	Epidermal growth factor receptor OS=Homo sapiens GN=EGFR PE=1 SV=2 - [EGFR_HUMAN]	74.2472	6.61	1	5	6	20	7.86998e+07	1.38566	5	20.0266	1210	134.19	6.68311
P10586	Receptor-type tyrosine-protein phosphatase F OS=Homo sapiens GN=PTPRF PE=1 SV=2 - [PTPRF_HUMAN]	71.5893	9.23	3	13	13	20	3.51429e+06	0.80642	11	9.13649	1907	212.744	6.30322
P06576	ATP synthase subunit beta, mitochondrial OS=Homo sapiens GN=ATP5B PE=1 SV=3 - [ATPB_HUMAN]	69.3017	39.13	1	13	13	21	4.33783e+06	1.24907	14	11.5434	529	56.5246	5.40186
Q9H6S3	Epidermal growth factor receptor kinase substrate 8-like protein 2 OS=Homo sapiens GN=EPS8L2 PE=1 SV=2 - [ES8L2_HUMAN]	67.0325	24.34	1	10	10	18	4.29645e+06	0.579207	9	26.6265	715	80.5701	6.84424
P60842	Eukaryotic initiation factor 4A-I OS=Homo sapiens GN=EIF4A1 PE=1 SV=1 - [IF4A1_HUMAN]	66.6629	32.76	3	11	11	18	6.18849e+06	1.02916	14	14.1671	406	46.1246	5.47803
Q9Y446	Plakophilin-3 OS=Homo sapiens GN=PKP3 PE=1 SV=1 - [PKP3_HUMAN]	66.1506	22.71	1	13	13	22	4.25897e+06	0.988276	14	15.6628	797	87.029	9.31982
P13647	Keratin, type II cytoskeletal 5 OS=Homo sapiens GN=KRT5 PE=1 SV=3 - [K2C5_HUMAN]	64.8902	21.36	7	6	11	18	2.8091e+07				590	62.34	7.73779
P46781	40S ribosomal protein S9 OS=Homo sapiens GN=RPS9 PE=1 SV=3 - [RS9_HUMAN]	64.3037	35.05	1	11	11	24	1.1588e+07	1.10004	10	8.90491	194	22.5776	10.6528
Q9UHD8	Septin-9 OS=Homo sapiens GN=SEPT9 PE=1 SV=2 - [SEPT9_HUMAN]	63.7223	26.11	1	10	10	19	3.92902e+06	0.893158	7	11.694	586	65.3608	8.96826
O75131	Copine-3 OS=Homo sapiens GN=CPNE3 PE=1 SV=1 - [CPNE3_HUMAN]	63.701	18.06	8	9	9	23	4.81404e+06	1.12396	11	7.24346	537	60.0921	5.84619
O14745	Na(+)/H(+) exchange regulatory cofactor NHE-RF1 OS=Homo sapiens GN=SLC9A3R1 PE=1 SV=4 - [NHRF1_HUMAN]	63.4299	38.55	1	8	8	17	8.11043e+06	1.23548	6	8.46344	358	38.8446	5.77002
P63092	Guanine nucleotide-binding protein G(s) subunit alpha isoforms short OS=Homo sapiens GN=GNAS PE=1 SV=1 - [GNAS2_HUMAN]	63.3499	42.64	7	10	11	25	1.43297e+07	0.975217	11	7.62534	394	45.6359	5.8208
P62244	40S ribosomal protein S15a OS=Homo sapiens GN=RPS15A PE=1 SV=2 - [RS15A_HUMAN]	62.9746	54.62	1	7	7	20	1.11341e+07	1.07471	8	18.0269	130	14.83	10.1255
P35579	Myosin-9 OS=Homo sapiens GN=MYH9 PE=1 SV=4 - [MYH9_HUMAN]	61.9685	10.61	4	14	14	18	1.72839e+06	0.521102	11	30.3445	1960	226.392	5.60498
P63244	Guanine nucleotide-binding protein subunit beta-2-like 1 OS=Homo sapiens GN=GNB2L1 PE=1 SV=3 - [GBLP_HUMAN]	61.7295	33.12	1	9	9	17	7.53873e+06	0.933104	11	14.6938	317	35.0546	7.69385
Q14160	Protein scribble homolog OS=Homo sapiens GN=SCRIB PE=1 SV=4 - [SCRIB_HUMAN]	61.4027	15.15	2	15	15	19	3.43626e+06	0.808308	13	16.4047	1630	174.778	5.07178
P60660	Myosin light polypeptide 6 OS=Homo sapiens GN=MYL6 PE=1 SV=2 - [MYL6_HUMAN]	61.0953	50.99	4	6	6	17	1.023e+07	0.914511	7	7.35598	151	16.9191	4.65283
P63104	14-3-3 protein zeta/delta OS=Homo sapiens GN=YWHAZ PE=1 SV=1 - [1433Z_HUMAN]	61.09	38.37	1	6	8	18	7.44104e+06	0.9446	5	2.23782	245	27.7277	4.79248
P62249	40S ribosomal protein S16 OS=Homo sapiens GN=RPS16 PE=1 SV=2 - [RS16_HUMAN]	60.7395	49.32	1	8	8	19	1.81064e+07	1.01823	10	9.896	146	16.435	10.2134
P61981	14-3-3 protein gamma OS=Homo sapiens GN=YWHAG PE=1 SV=2 - [1433G_HUMAN]	60.6235	30.36	3	2	7	18	9.06934e+06	0.957741	2	0.699858	247	28.2849	4.89404
Q96QK1	Vacuolar protein sorting-associated protein 35 OS=Homo sapiens GN=VPS35 PE=1 SV=2 - [VPS35_HUMAN]	60.5243	18.09	1	11	11	17	3.87267e+06	1.09862	9	29.1119	796	91.6489	5.49072
O14980	Exportin-1 OS=Homo sapiens GN=XPO1 PE=1 SV=1 - [XPO1_HUMAN]	58.175	15.03	1	10	10	20	3.18845e+06	0.851324	10	18.9772	1071	123.306	6.06201
P50991	T-complex protein 1 subunit delta OS=Homo sapiens GN=CCT4 PE=1 SV=4 - [TCPD_HUMAN]	57.6022	21.34	1	8	8	16	2.97497e+06	0.927925	8	5.56454	539	57.8878	7.82568
P23526	Adenosylhomocysteinase OS=Homo sapiens GN=AHCY PE=1 SV=4 - [SAHH_HUMAN]	57.2125	25.46	1	9	9	19	2.88312e+06	1.12293	9	9.75067	432	47.6852	6.34131
Q96FQ6	Protein S100-A16 OS=Homo sapiens GN=S100A16 PE=1 SV=1 - [S10AG_HUMAN]	57.0027	57.28	1	6	6	17	3.3638e+06	1.14117	7	1.90953	103	11.794	6.78564
P78371	T-complex protein 1 subunit beta OS=Homo sapiens GN=CCT2 PE=1 SV=4 - [TCPB_HUMAN]	55.7405	23.74	1	8	8	15	1.91092e+06	0.997168	7	14.2955	535	57.4521	6.45557
P46783	40S ribosomal protein S10 OS=Homo sapiens GN=RPS10 PE=1 SV=1 - [RS10_HUMAN]	55.4426	33.33	2	5	5	16	5.89132e+06	0.881431	6	20.7784	165	18.8859	10.1548
P62937	Peptidyl-prolyl cis-trans isomerase A OS=Homo sapiens GN=PPIA PE=1 SV=2 - [PPIA_HUMAN]	54.691	28.48	6	6	6	16	2.14742e+07	1.18149	9	5.57022	165	18.0009	7.81104
P27348	14-3-3 protein theta OS=Homo sapiens GN=YWHAQ PE=1 SV=1 - [1433T_HUMAN]	54.4611	31.84	3	3	6	15	9.06934e+06	1.02466	3	42.972	245	27.7468	4.77979
Q12931	Heat shock protein 75 kDa, mitochondrial OS=Homo sapiens GN=TRAP1 PE=1 SV=3 - [TRAP1_HUMAN]	54.4583	11.51	1	5	6	13	1.84908e+07	1.0671	5	3.24686	704	80.0597	8.20654
P52292	Importin subunit alpha-1 OS=Homo sapiens GN=KPNA2 PE=1 SV=1 - [IMA1_HUMAN]	53.6496	17.2	1	7	7	13	3.67913e+06	0.853907	8	7.06198	529	57.8259	5.40186
P15880	40S ribosomal protein S2 OS=Homo sapiens GN=RPS2 PE=1 SV=2 - [RS2_HUMAN]	53.413	20.82	1	5	5	16	8.58932e+06	1.01891	7	6.72016	293	31.3046	10.2427
P51148	Ras-related protein Rab-5C OS=Homo sapiens GN=RAB5C PE=1 SV=2 - [RAB5C_HUMAN]	53.1262	48.61	3	7	7	13	5.15242e+06	1.2609	7	8.41159	216	23.4678	8.41162
P40227	T-complex protein 1 subunit zeta OS=Homo sapiens GN=CCT6A PE=1 SV=3 - [TCPZ_HUMAN]	52.0008	22.6	2	8	8	16	2.47239e+06	1.0235	9	9.19263	531	57.9876	6.68311
Q14247	Src substrate cortactin OS=Homo sapiens GN=CTTN PE=1 SV=2 - [SRC8_HUMAN]	51.3195	22.55	1	9	9	14	1.94016e+06	0.70964	6	57.0398	550	61.5485	5.40186
Q96TA1	Niban-like protein 1 OS=Homo sapiens GN=FAM129B PE=1 SV=3 - [NIBL1_HUMAN]	51.2923	21.18	1	8	8	16	4.53152e+06	1.07025	9	5.65485	746	84.0847	6.18896
P49368	T-complex protein 1 subunit gamma OS=Homo sapiens GN=CCT3 PE=1 SV=4 - [TCPG_HUMAN]	51.2283	30.09	2	12	12	16	4.1221e+06	0.954014	10	12.0094	545	60.4953	6.49365
P62263	40S ribosomal protein S14 OS=Homo sapiens GN=RPS14 PE=1 SV=3 - [RS14_HUMAN]	50.8462	31.79	1	4	4	14	5.81526e+06	0.954609	4	8.72847	151	16.2625	10.0522
P62258	14-3-3 protein epsilon OS=Homo sapiens GN=YWHAE PE=1 SV=1 - [1433E_HUMAN]	49.9463	37.25	1	6	8	14	6.41115e+06	1.03549	4	8.48205	255	29.1554	4.7417
P63241	Eukaryotic translation initiation factor 5A-1 OS=Homo sapiens GN=EIF5A PE=1 SV=2 - [IF5A1_HUMAN]	48.7569	28.57	3	4	4	11	6.09536e+06	0.991849	5	11.2418	154	16.8214	5.23682
Q14451	Growth factor receptor-bound protein 7 OS=Homo sapiens GN=GRB7 PE=1 SV=2 - [GRB7_HUMAN]	48.7287	20.86	1	7	7	13	3.56757e+06	1.01026	7	19.081	532	59.6434	8.49951
O15031	Plexin-B2 OS=Homo sapiens GN=PLXNB2 PE=1 SV=3 - [PLXB2_HUMAN]	48.7277	6.09	1	9	9	15	2.73633e+06	0.834157	7	21.5329	1838	204.997	6.23975
P40939	Trifunctional enzyme subunit alpha, mitochondrial OS=Homo sapiens GN=HADHA PE=1 SV=2 - [ECHA_HUMAN]	48.6963	18.48	1	11	11	16	1.64817e+06	1.21523	11	10.1425	763	82.9469	9.0415
Q7L576	Cytoplasmic FMR1-interacting protein 1 OS=Homo sapiens GN=CYFIP1 PE=1 SV=1 - [CYFP1_HUMAN]	46.8778	8.46	2	9	9	15	3.07843e+06	0.662785	7	6.93486	1253	145.089	6.90283
Q9Y490	Talin-1 OS=Homo sapiens GN=TLN1 PE=1 SV=3 - [TLN1_HUMAN]	46.7788	6.22	1	10	10	14	1.08335e+06	0.698398	6	7.43246	2541	269.599	6.07471
P04844	Dolichyl-diphosphooligosaccharide--protein glycosyltransferase subunit 2 OS=Homo sapiens GN=RPN2 PE=1 SV=3 - [RPN2_HUMAN]	46.3468	14.58	1	5	5	12	1.14315e+06	1.14729	5	3.01852	631	69.241	5.69385
Q9Y285	Phenylalanine--tRNA ligase alpha subunit OS=Homo sapiens GN=FARSA PE=1 SV=3 - [SYFA_HUMAN]	46.1502	19.69	1	6	6	13	1.42348e+06	0.785145	6	11.0317	508	57.5275	7.79639
P12236	ADP/ATP translocase 3 OS=Homo sapiens GN=SLC25A6 PE=1 SV=4 - [ADT3_HUMAN]	45.9331	17.45	3	1	5	14	8.22994e+06	0.968226	1		298	32.8452	9.74463
O00571	ATP-dependent RNA helicase DDX3X OS=Homo sapiens GN=DDX3X PE=1 SV=3 - [DDX3X_HUMAN]	45.6718	11.78	4	6	6	15	1.65086e+06	0.990067	6	17.9998	662	73.198	7.18115
P18085	ADP-ribosylation factor 4 OS=Homo sapiens GN=ARF4 PE=1 SV=3 - [ARF4_HUMAN]	45.577	44.44	1	3	6	13	5.38599e+06	1.27348	3	0.404293	180	20.4977	7.13721
P14625	Endoplasmin OS=Homo sapiens GN=HSP90B1 PE=1 SV=1 - [ENPL_HUMAN]	45.5696	9.34	1	5	7	14	1.13522e+07	1.12847	4	7.3189	803	92.4113	4.84326
Q96KK5	Histone H2A type 1-H OS=Homo sapiens GN=HIST1H2AH PE=1 SV=3 - [H2A1H_HUMAN]	45.4447	35.94	14	3	4	11	1.10057e+07	0.981206	4	7.21277	128	13.8978	10.8872
P61204	ADP-ribosylation factor 3 OS=Homo sapiens GN=ARF3 PE=1 SV=2 - [ARF3_HUMAN]	44.9796	44.2	3	4	7	13	5.57786e+06	1.37995	4	5.45524	181	20.5877	7.43018
P50990	T-complex protein 1 subunit theta OS=Homo sapiens GN=CCT8 PE=1 SV=4 - [TCPQ_HUMAN]	44.3355	16.61	1	8	8	12	2.30673e+06	0.941951	7	11.323	548	59.5825	5.60498
P07737	Profilin-1 OS=Homo sapiens GN=PFN1 PE=1 SV=2 - [PROF1_HUMAN]	44.1679	57.86	1	7	7	13	6.78075e+06	1.10103	6	7.82267	140	15.0446	8.26514
P62241	40S ribosomal protein S8 OS=Homo sapiens GN=RPS8 PE=1 SV=2 - [RS8_HUMAN]	44.1141	38.46	1	7	7	12	6.74566e+06	1.17355	7	21.2183	208	24.1902	10.3159
P40763	Signal transducer and activator of transcription 3 OS=Homo sapiens GN=STAT3 PE=1 SV=2 - [STAT3_HUMAN]	43.6702	19.09	1	10	10	17	3.43901e+06	0.80013	10	13.9141	770	88.0114	6.30322
P24752	Acetyl-CoA acetyltransferase, mitochondrial OS=Homo sapiens GN=ACAT1 PE=1 SV=1 - [THIL_HUMAN]	43.5514	18.03	1	6	6	13	2.22174e+06	1.36849	7	17.8793	427	45.1706	8.85107
Q06830	Peroxiredoxin-1 OS=Homo sapiens GN=PRDX1 PE=1 SV=1 - [PRDX1_HUMAN]	43.4977	36.68	2	7	8	15	8.2247e+06	1.12128	7	8.3686	199	22.0963	8.1333
Q01433	AMP deaminase 2 OS=Homo sapiens GN=AMPD2 PE=1 SV=2 - [AMPD2_HUMAN]	43.4618	15.36	1	11	11	15	6.57367e+06	0.648929	11	12.2423	879	100.624	6.93213
P62701	40S ribosomal protein S4, X isoform OS=Homo sapiens GN=RPS4X PE=1 SV=2 - [RS4X_HUMAN]	41.4546	38.02	3	9	9	17	7.64353e+06	1.01091	9	7.52936	263	29.5791	10.1548
P09972	Fructose-bisphosphate aldolase C OS=Homo sapiens GN=ALDOC PE=1 SV=2 - [ALDOC_HUMAN]	41.281	7.14	1	1	2	8	4.96968e+06				364	39.4312	6.87354
P00338	L-lactate dehydrogenase A chain OS=Homo sapiens GN=LDHA PE=1 SV=2 - [LDHA_HUMAN]	41.2807	18.37	2	5	5	12	4.14855e+06	1.13541	6	2.50213	332	36.6654	8.26514
Q7KZI7	Serine/threonine-protein kinase MARK2 OS=Homo sapiens GN=MARK2 PE=1 SV=2 - [MARK2_HUMAN]	39.7006	17.89	4	11	11	14	2.42283e+06	0.851396	11	12.7759	788	87.8559	9.71533
P48735	Isocitrate dehydrogenase [NADP], mitochondrial OS=Homo sapiens GN=IDH2 PE=1 SV=2 - [IDHP_HUMAN]	39.6558	19.91	1	6	6	11	2.16536e+06	1.32327	6	21.4935	452	50.8769	8.68994
P61026	Ras-related protein Rab-10 OS=Homo sapiens GN=RAB10 PE=1 SV=1 - [RAB10_HUMAN]	39.2021	22.5	20	2	4	11	5.71219e+06	1.30213	2	2.50302	200	22.5266	8.38232
P08195	4F2 cell-surface antigen heavy chain OS=Homo sapiens GN=SLC3A2 PE=1 SV=3 - [4F2_HUMAN]	38.883	14.44	1	5	5	10	1.49003e+06	1.25201	5	10.3979	630	67.9517	5.0083
P55084	Trifunctional enzyme subunit beta, mitochondrial OS=Homo sapiens GN=HADHB PE=1 SV=3 - [ECHB_HUMAN]	38.793	14.35	1	6	6	12	1.61924e+06	1.38997	6	21.8567	474	51.2615	9.40771
P23528	Cofilin-1 OS=Homo sapiens GN=CFL1 PE=1 SV=3 - [COF1_HUMAN]	38.6995	42.17	2	4	4	9	8.26451e+06	1.12653	5	7.78576	166	18.4907	8.08936
Q9P2J5	Leucine--tRNA ligase, cytoplasmic OS=Homo sapiens GN=LARS PE=1 SV=2 - [SYLC_HUMAN]	38.3122	10.03	1	8	8	12	1.17088e+06	1.05485	7	14.8758	1176	134.379	7.29834
P55196	Afadin OS=Homo sapiens GN=MLLT4 PE=1 SV=3 - [AFAD_HUMAN]	38.1598	6.09	1	6	6	9	1.80487e+06	0.649802	5	25.6617	1824	206.676	6.46826
P62841	40S ribosomal protein S15 OS=Homo sapiens GN=RPS15 PE=1 SV=2 - [RS15_HUMAN]	37.2697	13.1	1	1	1	9	2.2882e+06	1.03104	2	4.99592	145	17.0292	10.3892
P19367	Hexokinase-1 OS=Homo sapiens GN=HK1 PE=1 SV=3 - [HXK1_HUMAN]	37.1485	7.85	2	7	7	12	1.11106e+06	0.941274	7	11.7199	917	102.42	6.80029
Q02790	Peptidyl-prolyl cis-trans isomerase FKBP4 OS=Homo sapiens GN=FKBP4 PE=1 SV=3 - [FKBP4_HUMAN]	37.1234	18.52	1	7	7	12	3.46298e+06	1.16829	7	20.1325	459	51.7721	5.42725
Q15758	Neutral amino acid transporter B(0) OS=Homo sapiens GN=SLC1A5 PE=1 SV=2 - [AAAT_HUMAN]	36.7484	9.24	1	4	4	10	4.52957e+06	0.962951	4	6.01524	541	56.5623	5.47803
P61313	60S ribosomal protein L15 OS=Homo sapiens GN=RPL15 PE=1 SV=2 - [RL15_HUMAN]	36.2354	16.18	1	3	3	12	1.23289e+06	1.0695	3	4.6195	204	24.1311	11.6196
Q68EM7	Rho GTPase-activating protein 17 OS=Homo sapiens GN=ARHGAP17 PE=1 SV=1 - [RHG17_HUMAN]	36.1405	14.53	1	5	5	13	1.82995e+06	0.914913	3	2.83028	881	95.3773	7.62061
P05141	ADP/ATP translocase 2 OS=Homo sapiens GN=SLC25A5 PE=1 SV=7 - [ADT2_HUMAN]	36.1335	17.45	3	1	5	12	8.46283e+06	1.13881	1		298	32.8312	9.68604
P40926	Malate dehydrogenase, mitochondrial OS=Homo sapiens GN=MDH2 PE=1 SV=3 - [MDHM_HUMAN]	36.0516	28.7	1	7	7	10	2.64995e+06	1.43095	7	7.13354	338	35.4807	8.67529
P61247	40S ribosomal protein S3a OS=Homo sapiens GN=RPS3A PE=1 SV=2 - [RS3A_HUMAN]	35.9962	28.03	1	7	7	13	6.10066e+06	0.954556	6	10.2808	264	29.9257	9.72998
P22392	Nucleoside diphosphate kinase B OS=Homo sapiens GN=NME2 PE=1 SV=1 - [NDKB_HUMAN]	35.8549	41.45	3	4	4	13	6.78204e+06	0.99212	6	6.5177	152	17.2869	8.41162
P29401	Transketolase OS=Homo sapiens GN=TKT PE=1 SV=3 - [TKT_HUMAN]	35.8029	14.29	1	5	5	10	1.00077e+06	1.04306	5	22.4727	623	67.8347	7.66455
P08865	40S ribosomal protein SA OS=Homo sapiens GN=RPSA PE=1 SV=4 - [RSSA_HUMAN]	35.6422	18.98	1	4	4	10	7.98933e+06	0.998103	5	2.9012	295	32.8334	4.86865
Q15019	Septin-2 OS=Homo sapiens GN=SEPT2 PE=1 SV=1 - [SEPT2_HUMAN]	35.3428	22.71	1	5	5	9	2.13235e+06	1.00328	4	1.33922	361	41.4613	6.59521
P60953	Cell division control protein 42 homolog OS=Homo sapiens GN=CDC42 PE=1 SV=2 - [CDC42_HUMAN]	35.3201	14.66	1	2	2	10	1.57565e+06	1.31401	2	11.1242	191	21.245	6.55127
P62913	60S ribosomal protein L11 OS=Homo sapiens GN=RPL11 PE=1 SV=2 - [RL11_HUMAN]	35.1912	18.54	1	3	3	10	1.02111e+07	1.04106	4	3.60583	178	20.2396	9.59814
P08729	Keratin, type II cytoskeletal 7 OS=Homo sapiens GN=KRT7 PE=1 SV=5 - [K2C7_HUMAN]	34.9484	14.5	9	4	7	10	4.60031e+06	1.13663	3	7.57069	469	51.3543	5.47803
P02768	Serum albumin OS=Homo sapiens GN=ALB PE=1 SV=2 - [ALBU_HUMAN]	34.8942	3.61	1	3	3	10	8.13335e+07				609	69.3215	6.27783
P36957	Dihydrolipoyllysine-residue succinyltransferase component of 2-oxoglutarate dehydrogenase complex, mitochondrial OS=Homo sapiens GN=DLST PE=1 SV=4 - [ODO2_HUMAN]	34.6143	12.36	1	5	5	10	1.36064e+06	0.927002	4	4.29328	453	48.7245	8.95361
P26373	60S ribosomal protein L13 OS=Homo sapiens GN=RPL13 PE=1 SV=4 - [RL13_HUMAN]	33.6185	19.43	1	4	4	11	5.71014e+06	0.929186	5	14.9022	211	24.2465	11.6489
P05091	Aldehyde dehydrogenase, mitochondrial OS=Homo sapiens GN=ALDH2 PE=1 SV=2 - [ALDH2_HUMAN]	33.2765	13.54	1	5	5	9	1.20956e+06	1.57874	6	6.12799	517	56.3456	7.04932
P22061	Protein-L-isoaspartate(D-aspartate) O-methyltransferase OS=Homo sapiens GN=PCMT1 PE=1 SV=4 - [PIMT_HUMAN]	32.9053	51.1	1	7	7	12	1.12103e+07	0.964015	8	12.3757	227	24.6206	7.21045
P31327	Carbamoyl-phosphate synthase [ammonia], mitochondrial OS=Homo sapiens GN=CPS1 PE=1 SV=2 - [CPSM_HUMAN]	32.5153	9.27	1	8	8	10	1.1882e+06	1.37144	7	4.03105	1500	164.835	6.7417
P42704	Leucine-rich PPR motif-containing protein, mitochondrial OS=Homo sapiens GN=LRPPRC PE=1 SV=3 - [LPPRC_HUMAN]	32.4811	11.41	1	11	11	13	1.36202e+06	0.77741	9	11.6987	1394	157.805	6.12549
P11177	Pyruvate dehydrogenase E1 component subunit beta, mitochondrial OS=Homo sapiens GN=PDHB PE=1 SV=3 - [ODPB_HUMAN]	32.2866	21.73	1	6	6	10	4.24757e+06	0.980937	6	13.5715	359	39.208	6.65381
Q9P0V3	SH3 domain-binding protein 4 OS=Homo sapiens GN=SH3BP4 PE=1 SV=1 - [SH3B4_HUMAN]	32.1292	8.72	1	7	7	10	1.97619e+06	0.822559	6	14.5255	963	107.428	7.7085
O95373	Importin-7 OS=Homo sapiens GN=IPO7 PE=1 SV=1 - [IPO7_HUMAN]	31.946	6.74	1	5	6	11	2.49971e+06	0.935901	4	1.09411	1038	119.44	4.81787
P62158	Calmodulin OS=Homo sapiens GN=CALM1 PE=1 SV=2 - [CALM_HUMAN]	31.8999	22.15	1	2	2	8	8.08775e+06	1.19722	6	7.90846	149	16.8268	4.22119
Q96C36	Pyrroline-5-carboxylate reductase 2 OS=Homo sapiens GN=PYCR2 PE=1 SV=1 - [P5CR2_HUMAN]	31.5397	8.44	1	3	3	8	3.74978e+06	0.90176	3	5.31391	320	33.6157	7.76709
P11586	C-1-tetrahydrofolate synthase, cytoplasmic OS=Homo sapiens GN=MTHFD1 PE=1 SV=3 - [C1TC_HUMAN]	31.5174	9.52	1	7	8	10	1.71949e+06	0.912803	7	14.1488	935	101.495	7.29834
P62805	Histone H4 OS=Homo sapiens GN=HIST1H4A PE=1 SV=2 - [H4_HUMAN]	31.0522	41.75	1	4	4	10	8.91949e+06	0.896629	3	5.70519	103	11.3604	11.356
P07947	Tyrosine-protein kinase Yes OS=Homo sapiens GN=YES1 PE=1 SV=3 - [YES_HUMAN]	30.344	16.57	25	5	9	13	2.26335e+06	0.966754	4	5.4874	543	60.7625	6.7417
Q15366	Poly(rC)-binding protein 2 OS=Homo sapiens GN=PCBP2 PE=1 SV=1 - [PCBP2_HUMAN]	30.1691	26.85	2	4	5	8	2.6071e+06	0.88222	4	17.4447	365	38.5556	6.78564
Q14118	Dystroglycan OS=Homo sapiens GN=DAG1 PE=1 SV=2 - [DAG1_HUMAN]	30.1324	7.82	1	4	4	10	5.11227e+06	0.803821	5	6.78161	895	97.3807	8.55811
P17987	T-complex protein 1 subunit alpha OS=Homo sapiens GN=TCP1 PE=1 SV=1 - [TCPA_HUMAN]	30.11	16.01	1	7	7	11	2.02483e+06	0.872019	7	4.29796	556	60.3056	6.11279
P62081	40S ribosomal protein S7 OS=Homo sapiens GN=RPS7 PE=1 SV=1 - [RS7_HUMAN]	29.9239	43.3	1	5	5	10	6.16047e+06	0.85202	3	1.12887	194	22.1133	10.0962
P62277	40S ribosomal protein S13 OS=Homo sapiens GN=RPS13 PE=1 SV=2 - [RS13_HUMAN]	29.8653	37.75	1	5	5	12	5.05111e+06	1.06661	7	4.63657	151	17.2117	10.5356
P52943	Cysteine-rich protein 2 OS=Homo sapiens GN=CRIP2 PE=1 SV=1 - [CRIP2_HUMAN]	29.6046	24.52	1	2	2	6	1.0351e+07	0.896287	3	0.857645	208	22.478	8.71924
P60866	40S ribosomal protein S20 OS=Homo sapiens GN=RPS20 PE=1 SV=1 - [RS20_HUMAN]	29.4413	22.69	1	3	3	8	9.63362e+06	1.01898	5	3.25214	119	13.3643	9.93506
Q9H0U4	Ras-related protein Rab-1B OS=Homo sapiens GN=RAB1B PE=1 SV=1 - [RAB1B_HUMAN]	29.135	34.83	22	3	5	9	5.57917e+06	1.31003	3	1.08204	201	22.1572	5.73193
O60610	Protein diaphanous homolog 1 OS=Homo sapiens GN=DIAPH1 PE=1 SV=2 - [DIAP1_HUMAN]	29.059	6.13	1	6	6	8	1.79159e+06	1.18253	6	14.416	1272	141.258	5.41455
Q9Y2A7	Nck-associated protein 1 OS=Homo sapiens GN=NCKAP1 PE=1 SV=1 - [NCKP1_HUMAN]	28.9779	5.94	1	6	6	9	1.6836e+06	0.933343	4	15.4899	1128	128.707	6.62451
P12931	Proto-oncogene tyrosine-protein kinase Src OS=Homo sapiens GN=SRC PE=1 SV=3 - [SRC_HUMAN]	28.7937	13.81	1	3	6	9	1.8987e+06	1.08284	3	17.3967	536	59.797	7.41553
Q9UQB8	Brain-specific angiogenesis inhibitor 1-associated protein 2 OS=Homo sapiens GN=BAIAP2 PE=1 SV=1 - [BAIP2_HUMAN]	28.5409	17.21	1	6	6	8	2.03517e+06	0.894705	5	9.31112	552	60.8296	8.89502
Q15365	Poly(rC)-binding protein 1 OS=Homo sapiens GN=PCBP1 PE=1 SV=2 - [PCBP1_HUMAN]	27.8737	18.26	2	3	4	8	2.95082e+06	1.13464	2	16.1889	356	37.4739	7.09326
P55327	Tumor protein D52 OS=Homo sapiens GN=TPD52 PE=1 SV=2 - [TPD52_HUMAN]	27.4993	35.71	1	4	4	7	2.09024e+06	1.27534	3	4.83717	224	24.3122	4.83057
P12532	Creatine kinase U-type, mitochondrial OS=Homo sapiens GN=CKMT1A PE=1 SV=1 - [KCRU_HUMAN]	26.6162	22.06	1	5	5	7	2.52408e+06	1.12868	5	3.6358	417	47.0072	8.33838
P29692	Elongation factor 1-delta OS=Homo sapiens GN=EEF1D PE=1 SV=5 - [EF1D_HUMAN]	26.338	22.06	1	4	4	7	3.6759e+06	1.04151	4	10.0638	281	31.1028	5.0083
O96013	Serine/threonine-protein kinase PAK 4 OS=Homo sapiens GN=PAK4 PE=1 SV=1 - [PAK4_HUMAN]	26.1657	20.3	1	7	7	10	1.47982e+06	1.01166	8	13.225	591	64.0322	9.72998
P21291	Cysteine and glycine-rich protein 1 OS=Homo sapiens GN=CSRP1 PE=1 SV=3 - [CSRP1_HUMAN]	25.6497	27.98	1	3	3	7	1.39496e+07	0.903242	3	2.44989	193	20.5538	8.57275
Q16698	2,4-dienoyl-CoA reductase, mitochondrial OS=Homo sapiens GN=DECR1 PE=1 SV=1 - [DECR_HUMAN]	25.5765	17.91	1	5	5	7	3.35369e+06	1.21693	5	3.52745	335	36.0448	9.27588
Q9UJU6	Drebrin-like protein OS=Homo sapiens GN=DBNL PE=1 SV=1 - [DBNL_HUMAN]	25.4236	9.53	1	3	3	6	1.34711e+06	0.794952	3	34.0392	430	48.1776	5.04639
Q86X29	Lipolysis-stimulated lipoprotein receptor OS=Homo sapiens GN=LSR PE=1 SV=4 - [LSR_HUMAN]	25.4193	14.33	1	6	6	8	2.0144e+06	0.92403	5	5.47698	649	71.3939	7.97217
P61586	Transforming protein RhoA OS=Homo sapiens GN=RHOA PE=1 SV=1 - [RHOA_HUMAN]	25.3455	25.39	2	2	3	7	4.08216e+06	1.38439	2	7.3817	193	21.7541	6.1001
P32969	60S ribosomal protein L9 OS=Homo sapiens GN=RPL9 PE=1 SV=1 - [RL9_HUMAN]	24.9553	22.92	1	4	4	7	2.22378e+06	1.10743	6	3.03795	192	21.8498	9.94971
Q04695	Keratin, type I cytoskeletal 17 OS=Homo sapiens GN=KRT17 PE=1 SV=2 - [K1C17_HUMAN]	24.9403	11.57	10	1	5	8	1.75465e+07				432	48.076	5.021
P36578	60S ribosomal protein L4 OS=Homo sapiens GN=RPL4 PE=1 SV=5 - [RL4_HUMAN]	24.8855	9.6	1	3	3	7	1.70663e+06	0.992316	3	0.282625	427	47.6674	11.063
P53007	Tricarboxylate transport protein, mitochondrial OS=Homo sapiens GN=SLC25A1 PE=1 SV=2 - [TXTP_HUMAN]	24.3282	10.29	1	3	3	7	2.74572e+06	0.971996	1		311	33.991	9.89111
Q9H223	EH domain-containing protein 4 OS=Homo sapiens GN=EHD4 PE=1 SV=1 - [EHD4_HUMAN]	24.2947	12.75	1	5	5	6	1.63801e+06	1.3057	5	19.0485	541	61.1365	6.75635
Q7Z2W4	Zinc finger CCCH-type antiviral protein 1 OS=Homo sapiens GN=ZC3HAV1 PE=1 SV=3 - [ZCCHV_HUMAN]	24.2358	4.99	1	3	3	6	780178	1.03796	3	39.8398	902	101.367	8.39697
P53621	Coatomer subunit alpha OS=Homo sapiens GN=COPA PE=1 SV=2 - [COPA_HUMAN]	24.19	6.21	1	5	5	8	1.35229e+06	0.783046	3	1.41439	1224	138.258	7.66455
Q9Y365	PCTP-like protein OS=Homo sapiens GN=STARD10 PE=1 SV=2 - [PCTL_HUMAN]	24.1265	17.87	1	4	4	8	3.29119e+06	1.38913	4	16.1583	291	33.0276	7.12256
O43790	Keratin, type II cuticular Hb6 OS=Homo sapiens GN=KRT86 PE=1 SV=1 - [KRT86_HUMAN]	23.6143	9.05	7	4	5	8	2.57538e+06	1.02226	4	7.13027	486	53.4663	5.65576
Q70J99	Protein unc-13 homolog D OS=Homo sapiens GN=UNC13D PE=1 SV=1 - [UN13D_HUMAN]	23.6029	6.88	1	4	4	9	1.02476e+06	0.991979	4	11.0765	1090	123.205	6.65381
P61254	60S ribosomal protein L26 OS=Homo sapiens GN=RPL26 PE=1 SV=1 - [RL26_HUMAN]	23.5912	26.9	2	5	5	8	3.31549e+06	1.0125	5	11.3275	145	17.2475	10.5503
O60814	Histone H2B type 1-K OS=Homo sapiens GN=HIST1H2BK PE=1 SV=3 - [H2B1K_HUMAN]	23.5715	11.9	14	1	1	6	8.67518e+06	1.1479	2	6.81216	126	13.8816	10.3159
P61158	Actin-related protein 3 OS=Homo sapiens GN=ACTR3 PE=1 SV=3 - [ARP3_HUMAN]	23.4578	15.55	3	5	5	8	2.17553e+06	0.879708	4	2.98727	418	47.341	5.88428
P21333	Filamin-A OS=Homo sapiens GN=FLNA PE=1 SV=4 - [FLNA_HUMAN]	23.4163	3.21	2	5	6	7	665904	0.872312	3	28.6527	2647	280.564	6.06201
P53618	Coatomer subunit beta OS=Homo sapiens GN=COPB1 PE=1 SV=3 - [COPB_HUMAN]	23.3012	5.04	1	3	3	6	1.27235e+06	0.613113	3	15.8503	953	107.074	6.04932
P62829	60S ribosomal protein L23 OS=Homo sapiens GN=RPL23 PE=1 SV=1 - [RL23_HUMAN]	23.1641	25.71	1	3	3	6	8.30639e+06	1.09684	3	0.903874	140	14.8561	10.5063
P42677	40S ribosomal protein S27 OS=Homo sapiens GN=RPS27 PE=1 SV=3 - [RS27_HUMAN]	23.1019	29.76	2	3	3	7	3.03528e+06	1.04565	4	17.5262	84	9.45484	9.45166
P62753	40S ribosomal protein S6 OS=Homo sapiens GN=RPS6 PE=1 SV=1 - [RS6_HUMAN]	23.1013	18.47	1	4	4	7	6.36786e+06	1.11268	5	19.2433	249	28.663	10.8433
P11233	Ras-related protein Ral-A OS=Homo sapiens GN=RALA PE=1 SV=1 - [RALA_HUMAN]	22.8807	18.45	1	1	3	7	1.6295e+06	1.34028	1		206	23.552	7.10791
Q66PJ3	ADP-ribosylation factor-like protein 6-interacting protein 4 OS=Homo sapiens GN=ARL6IP4 PE=1 SV=2 - [AR6P4_HUMAN]	22.725	11.88	1	3	3	6	2.88245e+06	0.814899	3	19.2137	421	44.8882	10.9312
P11234	Ras-related protein Ral-B OS=Homo sapiens GN=RALB PE=1 SV=1 - [RALB_HUMAN]	22.7165	18.93	1	1	3	7	1.16996e+06	1.16298	1		206	23.3939	6.62451
P62826	GTP-binding nuclear protein Ran OS=Homo sapiens GN=RAN PE=1 SV=3 - [RAN_HUMAN]	22.5704	16.67	1	4	4	7	5.32444e+06	1.04598	4	16.3226	216	24.4076	7.48877
Q04637	Eukaryotic translation initiation factor 4 gamma 1 OS=Homo sapiens GN=EIF4G1 PE=1 SV=4 - [IF4G1_HUMAN]	22.5264	5.88	2	6	6	8	1.57234e+06	0.750607	5	31.0634	1599	175.382	5.32568
Q8IZP0	Abl interactor 1 OS=Homo sapiens GN=ABI1 PE=1 SV=4 - [ABI1_HUMAN]	22.4229	8.86	1	3	3	5	2.91869e+06	0.615233	2	19.2027	508	55.0467	7.06396
P62993	Growth factor receptor-bound protein 2 OS=Homo sapiens GN=GRB2 PE=1 SV=1 - [GRB2_HUMAN]	21.9202	26.73	1	4	4	7	2.10057e+06	0.860184	4	11.5416	217	25.1904	6.31592
Q07020	60S ribosomal protein L18 OS=Homo sapiens GN=RPL18 PE=1 SV=2 - [RL18_HUMAN]	21.793	23.4	1	4	4	6	3.58747e+06	0.875825	3	2.3925	188	21.6211	11.7222
P26641	Elongation factor 1-gamma OS=Homo sapiens GN=EEF1G PE=1 SV=3 - [EF1G_HUMAN]	21.7449	10.3	1	4	4	6	4.55884e+06	0.869897	4	27.783	437	50.0871	6.66846
P08754	Guanine nucleotide-binding protein G(k) subunit alpha OS=Homo sapiens GN=GNAI3 PE=1 SV=3 - [GNAI3_HUMAN]	21.7175	10.73	7	1	3	7	1.03052e+07	0.995704	1		354	40.5063	5.69385
P31689	DnaJ homolog subfamily A member 1 OS=Homo sapiens GN=DNAJA1 PE=1 SV=2 - [DNJA1_HUMAN]	21.627	14.36	1	3	3	7	3.00763e+06	1.10648	4	4.66867	397	44.8395	7.07861
P62140	Serine/threonine-protein phosphatase PP1-beta catalytic subunit OS=Homo sapiens GN=PPP1CB PE=1 SV=3 - [PP1B_HUMAN]	21.5863	11.62	2	1	3	7	1.26014e+06	0.923125	1		327	37.1626	6.18896
O95292	Vesicle-associated membrane protein-associated protein B/C OS=Homo sapiens GN=VAPB PE=1 SV=3 - [VAPB_HUMAN]	21.5392	30.86	1	6	6	7	2.61846e+06	0.914235	5	9.5305	243	27.2111	7.29834
O00410	Importin-5 OS=Homo sapiens GN=IPO5 PE=1 SV=4 - [IPO5_HUMAN]	21.2552	8.48	1	6	7	8	1.98342e+06	0.8851	5	9.52666	1097	123.55	4.94482
Q14974	Importin subunit beta-1 OS=Homo sapiens GN=KPNB1 PE=1 SV=2 - [IMB1_HUMAN]	21.1822	7.08	1	4	4	6	1.10034e+06	0.883769	4	14.2118	876	97.108	4.77979
P62136	Serine/threonine-protein phosphatase PP1-alpha catalytic subunit OS=Homo sapiens GN=PPP1CA PE=1 SV=1 - [PP1A_HUMAN]	21.1642	16.97	2	2	4	7	1.68676e+06	0.847561	2	35.1793	330	37.4878	6.32861
Q14344	Guanine nucleotide-binding protein subunit alpha-13 OS=Homo sapiens GN=GNA13 PE=1 SV=2 - [GNA13_HUMAN]	21.0121	12.47	5	3	4	6	8.60284e+06	0.879054	2	15.6401	377	44.0217	8.00146
Q9NS69	Mitochondrial import receptor subunit TOM22 homolog OS=Homo sapiens GN=TOMM22 PE=1 SV=3 - [TOM22_HUMAN]	20.8263	25.35	1	2	2	5	2.32993e+06	1.07489	2	6.45306	142	15.5118	4.33545
P07814	Bifunctional glutamate/proline--tRNA ligase OS=Homo sapiens GN=EPRS PE=1 SV=5 - [SYEP_HUMAN]	20.7309	5.22	1	5	5	6	824980	0.985849	4	5.71248	1512	170.483	7.32764
Q99832	T-complex protein 1 subunit eta OS=Homo sapiens GN=CCT7 PE=1 SV=2 - [TCPH_HUMAN]	20.6959	12.89	1	4	4	6	1.38974e+06	0.964812	3	6.3587	543	59.3289	7.6499
P62745	Rho-related GTP-binding protein RhoB OS=Homo sapiens GN=RHOB PE=1 SV=1 - [RHOB_HUMAN]	20.5583	12.76	1	1	2	5	2.37037e+06	2.55853	1		196	22.1091	5.23682
P52209	6-phosphogluconate dehydrogenase, decarboxylating OS=Homo sapiens GN=PGD PE=1 SV=3 - [6PGD_HUMAN]	20.5299	13.87	1	4	4	5	1.93569e+06	0.829939	4	14.925	483	53.106	7.2251
P78527	DNA-dependent protein kinase catalytic subunit OS=Homo sapiens GN=PRKDC PE=1 SV=3 - [PRKDC_HUMAN]	20.5168	1.67	1	5	5	7	900904	0.816615	4	5.79522	4128	468.788	7.12256
A4D1S0	Killer cell lectin-like receptor subfamily G member 2 OS=Homo sapiens GN=KLRG2 PE=1 SV=3 - [KLRG2_HUMAN]	20.4553	13.45	1	4	4	6	2.31466e+06	1.07346	3	23.0937	409	42.8234	5.87158
P16403	Histone H1.2 OS=Homo sapiens GN=HIST1H1C PE=1 SV=2 - [H12_HUMAN]	20.2467	15.49	5	3	3	6	1.32454e+06	0.981706	4	9.44923	213	21.3517	10.9312
Q13765	Nascent polypeptide-associated complex subunit alpha OS=Homo sapiens GN=NACA PE=1 SV=1 - [NACA_HUMAN]	19.8417	13.49	2	2	2	4	845347	0.624907	2	45.7716	215	23.3697	4.56396
P39023	60S ribosomal protein L3 OS=Homo sapiens GN=RPL3 PE=1 SV=2 - [RL3_HUMAN]	19.7571	19.11	1	5	5	6	2.5362e+06	1.04665	5	1.68186	403	46.0798	10.1841
P62873	Guanine nucleotide-binding protein G(I)/G(S)/G(T) subunit beta-1 OS=Homo sapiens GN=GNB1 PE=1 SV=3 - [GBB1_HUMAN]	19.6485	6.18	4	2	2	7	1.29477e+07	1.07435	3	5.03859	340	37.353	5.99854
P36542	ATP synthase subunit gamma, mitochondrial OS=Homo sapiens GN=ATP5C1 PE=1 SV=1 - [ATPG_HUMAN]	19.5745	20.47	1	5	5	6	1.42249e+06	1.06546	4	7.8458	298	32.9753	9.21729
Q9UGI8	Testin OS=Homo sapiens GN=TES PE=1 SV=1 - [TES_HUMAN]	19.5446	8.08	1	3	3	6	3.24884e+06	0.788968	2	2.88686	421	47.9639	7.6792
Q14204	Cytoplasmic dynein 1 heavy chain 1 OS=Homo sapiens GN=DYNC1H1 PE=1 SV=5 - [DYHC1_HUMAN]	19.4781	1.53	1	4	4	6	1.18904e+06	0.803572	4	35.5407	4646	532.072	6.40479
P18124	60S ribosomal protein L7 OS=Homo sapiens GN=RPL7 PE=1 SV=1 - [RL7_HUMAN]	19.4445	15.32	1	3	3	6	2.47381e+06	1.02449	4	3.23037	248	29.2072	10.6528
P61160	Actin-related protein 2 OS=Homo sapiens GN=ACTR2 PE=1 SV=1 - [ARP2_HUMAN]	19.338	9.64	1	3	3	6	2.61621e+06	0.843054	3	15.1233	394	44.7322	6.7417
Q8N5I2	Arrestin domain-containing protein 1 OS=Homo sapiens GN=ARRDC1 PE=1 SV=1 - [ARRD1_HUMAN]	19.2985	10.62	1	4	4	7	1.68055e+06	1.0306	3	6.47941	433	45.9527	7.02002
P32119	Peroxiredoxin-2 OS=Homo sapiens GN=PRDX2 PE=1 SV=5 - [PRDX2_HUMAN]	19.2416	27.78	1	4	5	6	4.96711e+06	1.05217	4	15.74	198	21.8782	5.97314
P31949	Protein S100-A11 OS=Homo sapiens GN=S100A11 PE=1 SV=2 - [S10AB_HUMAN]	18.9355	23.81	1	2	2	5	1.6729e+06	1.38021	3	10.1022	105	11.7328	7.12256
Q9H2G2	STE20-like serine/threonine-protein kinase OS=Homo sapiens GN=SLK PE=1 SV=1 - [SLK_HUMAN]	18.9243	5.99	1	3	4	7	1.75819e+06	1.24639	2	38.097	1235	142.607	5.14795
P31948	Stress-induced-phosphoprotein 1 OS=Homo sapiens GN=STIP1 PE=1 SV=1 - [STIP1_HUMAN]	18.7153	5.89	1	3	3	5	2.49654e+06	1.02061	3	9.83794	543	62.5994	6.80029
P62847	40S ribosomal protein S24 OS=Homo sapiens GN=RPS24 PE=1 SV=1 - [RS24_HUMAN]	18.7135	29.32	1	4	4	5	2.31234e+06	0.941757	4	8.35419	133	15.4134	10.7847
P51153	Ras-related protein Rab-13 OS=Homo sapiens GN=RAB13 PE=1 SV=1 - [RAB13_HUMAN]	18.6384	16.75	1	2	3	6	2.67798e+06	0.980169	2	0.783732	203	22.7597	9.18799
P25815	Protein S100-P OS=Homo sapiens GN=S100P PE=1 SV=2 - [S100P_HUMAN]	18.5832	35.79	1	3	3	5	1.8259e+06	1.06835	3	10.5112	95	10.3932	4.88135
P37802	Transgelin-2 OS=Homo sapiens GN=TAGLN2 PE=1 SV=3 - [TAGL2_HUMAN]	18.1348	24.12	2	4	4	5	1.65233e+06	1.15368	4	2.59985	199	22.3772	8.25049
Q9Y6W5	Wiskott-Aldrich syndrome protein family member 2 OS=Homo sapiens GN=WASF2 PE=1 SV=3 - [WASF2_HUMAN]	18.0195	11.04	1	4	4	6	1.46786e+06	0.618327	4	9.42078	498	54.2504	5.52881
O43175	D-3-phosphoglycerate dehydrogenase OS=Homo sapiens GN=PHGDH PE=1 SV=4 - [SERA_HUMAN]	18.0062	10.13	1	4	4	5	674509	0.961267	3	1.23866	533	56.6144	6.7124
P04899	Guanine nucleotide-binding protein G(i) subunit alpha-2 OS=Homo sapiens GN=GNAI2 PE=1 SV=3 - [GNAI2_HUMAN]	18.0017	10.7	7	1	3	6	9.40141e+06	1.20031	1		355	40.4251	5.5415
Q05655	Protein kinase C delta type OS=Homo sapiens GN=PRKCD PE=1 SV=2 - [KPCD_HUMAN]	17.7993	4.29	1	2	2	4	1.31954e+06	0.94775	2	26.1785	676	77.4549	7.75244
Q9BXI6	TBC1 domain family member 10A OS=Homo sapiens GN=TBC1D10A PE=1 SV=1 - [TB10A_HUMAN]	17.7892	16.73	1	5	5	7	2.24116e+06	0.932876	5	9.09802	508	57.0813	8.44092
Q12959	Disks large homolog 1 OS=Homo sapiens GN=DLG1 PE=1 SV=2 - [DLG1_HUMAN]	17.4851	11.28	1	5	5	6	1.71664e+06	0.851	3	11.6066	904	100.393	5.75732
Q86VI3	Ras GTPase-activating-like protein IQGAP3 OS=Homo sapiens GN=IQGAP3 PE=1 SV=2 - [IQGA3_HUMAN]	17.4287	5.03	2	3	5	7	2.50629e+06	0.627285	2	11.7998	1631	184.584	7.6499
O75363	Breast carcinoma-amplified sequence 1 OS=Homo sapiens GN=BCAS1 PE=1 SV=2 - [BCAS1_HUMAN]	17.2335	12.67	1	4	4	5	928844	1.9939	2	3.08106	584	61.6715	5.09717
O95747	Serine/threonine-protein kinase OSR1 OS=Homo sapiens GN=OXSR1 PE=1 SV=1 - [OXSR1_HUMAN]	17.1237	9.87	1	4	4	5	620673	1.04508	3	9.94081	527	57.9861	6.43018
P62424	60S ribosomal protein L7a OS=Homo sapiens GN=RPL7A PE=1 SV=2 - [RL7A_HUMAN]	17.0793	10.15	1	2	2	4	3.46278e+06	0.962413	2	12.1889	266	29.977	10.6089
Q8WUM4	Programmed cell death 6-interacting protein OS=Homo sapiens GN=PDCD6IP PE=1 SV=1 - [PDC6I_HUMAN]	17.064	9.22	1	5	5	6	1.38339e+06	0.936325	4	20.3973	868	95.9631	6.52197
P05783	Keratin, type I cytoskeletal 18 OS=Homo sapiens GN=KRT18 PE=1 SV=2 - [K1C18_HUMAN]	17.0549	14.19	7	2	3	6	1.08021e+07	1.20272	2	23.2069	430	48.0285	5.45264
P08133	Annexin A6 OS=Homo sapiens GN=ANXA6 PE=1 SV=3 - [ANXA6_HUMAN]	16.9553	10.85	1	5	5	8	1.09892e+06	1.07478	4	36.375	673	75.8256	5.60498
P13489	Ribonuclease inhibitor OS=Homo sapiens GN=RNH1 PE=1 SV=2 - [RINI_HUMAN]	16.9208	8.89	1	3	3	4	1.78682e+06	1.02912	3	13.2005	461	49.9411	4.81787
O75369	Filamin-B OS=Homo sapiens GN=FLNB PE=1 SV=2 - [FLNB_HUMAN]	16.8941	3.07	2	3	4	7	882072	0.981833	3	22.457	2602	277.99	5.73193
Q14498	RNA-binding protein 39 OS=Homo sapiens GN=RBM39 PE=1 SV=2 - [RBM39_HUMAN]	16.7754	7.17	1	3	3	4	1.24055e+06	0.621516	2	22.4561	530	59.3427	10.0962
P50416	Carnitine O-palmitoyltransferase 1, liver isoform OS=Homo sapiens GN=CPT1A PE=1 SV=2 - [CPT1A_HUMAN]	16.6654	5.17	1	3	3	5	1.01974e+06	0.829804	2	0.0765802	773	88.3107	8.646
P52597	Heterogeneous nuclear ribonucleoprotein F OS=Homo sapiens GN=HNRNPF PE=1 SV=3 - [HNRPF_HUMAN]	16.6566	15.42	1	2	4	5	1.18062e+06	0.53812	2	96.2596	415	45.6429	5.57959
P61224	Ras-related protein Rap-1b OS=Homo sapiens GN=RAP1B PE=1 SV=1 - [RAP1B_HUMAN]	16.558	12.5	3	2	2	5	1.98263e+06	1.10861	2	3.86871	184	20.8116	5.78271
P08708	40S ribosomal protein S17 OS=Homo sapiens GN=RPS17 PE=1 SV=2 - [RS17_HUMAN]	16.5377	23.7	1	2	2	3	1.86129e+06	1.04836	2	4.74455	135	15.5404	9.84717
P09525	Annexin A4 OS=Homo sapiens GN=ANXA4 PE=1 SV=4 - [ANXA4_HUMAN]	16.4367	15.67	1	4	4	5	877166	1.31357	3	13.3104	319	35.8601	6.12549
P67809	Nuclease-sensitive element-binding protein 1 OS=Homo sapiens GN=YBX1 PE=1 SV=3 - [YBOX1_HUMAN]	16.3424	22.22	1	3	3	4	1.03248e+06	0.979778	1		324	35.9027	9.87646
Q13501	Sequestosome-1 OS=Homo sapiens GN=SQSTM1 PE=1 SV=1 - [SQSTM_HUMAN]	16.3336	5.91	1	1	1	3	1.15978e+06	1.41009	1		440	47.6569	5.22412
P00966	Argininosuccinate synthase OS=Homo sapiens GN=ASS1 PE=1 SV=2 - [ASSY_HUMAN]	15.9908	8.5	1	3	3	5	1.15769e+06	1.09491	3	19.3747	412	46.501	8.01611
Q15942	Zyxin OS=Homo sapiens GN=ZYX PE=1 SV=1 - [ZYX_HUMAN]	15.9346	11.71	1	4	4	6	1.56486e+06	0.666504	4	13.8698	572	61.2382	6.66846
Q9Y5M8	Signal recognition particle receptor subunit beta OS=Homo sapiens GN=SRPRB PE=1 SV=3 - [SRPRB_HUMAN]	15.7975	20.66	1	4	4	5	858924	0.837711	3	0.415016	271	29.6838	9.0415
Q9Y383	Putative RNA-binding protein Luc7-like 2 OS=Homo sapiens GN=LUC7L2 PE=1 SV=2 - [LC7L2_HUMAN]	15.7459	10.71	2	3	3	4	916398	0.629973	2	20.7344	392	46.4856	10.0083
Q14141	Septin-6 OS=Homo sapiens GN=SEPT6 PE=1 SV=4 - [SEPT6_HUMAN]	15.7112	15.21	4	2	4	5	1.14172e+06	0.956556	2	18.7396	434	49.6853	6.66846
Q16513	Serine/threonine-protein kinase N2 OS=Homo sapiens GN=PKN2 PE=1 SV=1 - [PKN2_HUMAN]	15.3814	8.13	1	5	5	5	805446	1.22136	5	39.4261	984	111.964	6.30322
O00299	Chloride intracellular channel protein 1 OS=Homo sapiens GN=CLIC1 PE=1 SV=4 - [CLIC1_HUMAN]	15.3766	12.45	1	2	2	4	1.6107e+06	0.944072	2	11.1016	241	26.9057	5.17334
Q86VP6	Cullin-associated NEDD8-dissociated protein 1 OS=Homo sapiens GN=CAND1 PE=1 SV=2 - [CAND1_HUMAN]	15.2513	3.17	1	3	3	6	702939	0.73652	2	19.9222	1230	136.289	5.78271
O75083	WD repeat-containing protein 1 OS=Homo sapiens GN=WDR1 PE=1 SV=4 - [WDR1_HUMAN]	14.9415	11.22	1	4	4	5	1.67926e+06	1.01974	4	7.19803	606	66.1519	6.65381
Q9UDY2	Tight junction protein ZO-2 OS=Homo sapiens GN=TJP2 PE=1 SV=2 - [ZO2_HUMAN]	14.8179	4.96	1	4	4	5	542693	1.03308	2	31.6502	1190	133.876	7.40088
P62266	40S ribosomal protein S23 OS=Homo sapiens GN=RPS23 PE=1 SV=3 - [RS23_HUMAN]	14.798	16.08	1	2	2	4	3.62468e+06	1.02047	2	4.41979	143	15.7977	10.4917
P46782	40S ribosomal protein S5 OS=Homo sapiens GN=RPS5 PE=1 SV=4 - [RS5_HUMAN]	14.7972	14.22	1	2	2	4	3.26266e+06	1.01069	2	1.82619	204	22.8621	9.71533
O94804	Serine/threonine-protein kinase 10 OS=Homo sapiens GN=STK10 PE=1 SV=1 - [STK10_HUMAN]	14.7947	6.71	1	3	4	6	1.14444e+06	0.844534	1		968	112.065	6.94678
P62330	ADP-ribosylation factor 6 OS=Homo sapiens GN=ARF6 PE=1 SV=2 - [ARF6_HUMAN]	14.5674	12	2	2	2	4	2.79205e+06	1.24658	1		175	20.0694	8.95361
P62280	40S ribosomal protein S11 OS=Homo sapiens GN=RPS11 PE=1 SV=3 - [RS11_HUMAN]	14.5648	24.05	1	5	5	6	3.73518e+06	0.987493	5	19.2828	158	18.419	10.3013
Q15084	Protein disulfide-isomerase A6 OS=Homo sapiens GN=PDIA6 PE=1 SV=1 - [PDIA6_HUMAN]	14.5334	14.77	1	4	4	5	1.09755e+06	1.10574	4	12.3449	440	48.0913	5.08447
Q9NR31	GTP-binding protein SAR1a OS=Homo sapiens GN=SAR1A PE=1 SV=1 - [SAR1A_HUMAN]	14.493	23.23	2	3	3	4	1.70881e+06	1.00184	3	76.8582	198	22.3525	6.68311
P18206	Vinculin OS=Homo sapiens GN=VCL PE=1 SV=4 - [VINC_HUMAN]	14.2821	3.79	1	3	3	6	812468	0.902839	4	13.7087	1134	123.722	5.65576
P35221	Catenin alpha-1 OS=Homo sapiens GN=CTNNA1 PE=1 SV=1 - [CTNA1_HUMAN]	14.2651	7.51	2	4	4	4	503201	0.92967	3	8.59303	906	100.009	6.29053
P49748	Very long-chain specific acyl-CoA dehydrogenase, mitochondrial OS=Homo sapiens GN=ACADVL PE=1 SV=1 - [ACADV_HUMAN]	14.0102	7.18	1	4	4	4	1.19818e+06	1.16902	3	58.2253	655	70.3454	8.74854
Q9UHR4	Brain-specific angiogenesis inhibitor 1-associated protein 2-like protein 1 OS=Homo sapiens GN=BAIAP2L1 PE=1 SV=2 - [BI2L1_HUMAN]	13.9983	11.55	1	3	3	4	1.21982e+06	0.809156	3	10.0415	511	56.8471	8.67529
Q9BSJ8	Extended synaptotagmin-1 OS=Homo sapiens GN=ESYT1 PE=1 SV=1 - [ESYT1_HUMAN]	13.9067	5.62	1	4	4	6	674667	0.950686	2	15.7563	1104	122.78	5.8335
P31943	Heterogeneous nuclear ribonucleoprotein H OS=Homo sapiens GN=HNRNPH1 PE=1 SV=4 - [HNRH1_HUMAN]	13.903	9.58	2	1	3	4	988909	0.773831	1		449	49.1984	6.30322
P22695	Cytochrome b-c1 complex subunit 2, mitochondrial OS=Homo sapiens GN=UQCRC2 PE=1 SV=3 - [QCR2_HUMAN]	13.7992	3.53	1	1	1	3	1.02305e+06	1.21594	1		453	48.4129	8.63135
P11166	Solute carrier family 2, facilitated glucose transporter member 1 OS=Homo sapiens GN=SLC2A1 PE=1 SV=2 - [GTR1_HUMAN]	13.7986	8.54	1	3	3	4	1.93733e+06	1.00355	1		492	54.0485	8.71924
P52815	39S ribosomal protein L12, mitochondrial OS=Homo sapiens GN=MRPL12 PE=1 SV=2 - [RM12_HUMAN]	13.7383	34.85	1	4	4	4	1.88017e+06	1.00601	3	7.7617	198	21.3346	8.86572
Q9BU68	Proline-rich protein 15-like protein OS=Homo sapiens GN=PRR15L PE=3 SV=1 - [PR15L_HUMAN]	13.6252	48.54	1	2	2	5	2.65406e+06	0.846428	2	0.427389	103	11.6981	9.49561
P62857	40S ribosomal protein S28 OS=Homo sapiens GN=RPS28 PE=1 SV=1 - [RS28_HUMAN]	13.5754	30.43	1	2	2	4	2.89257e+06	1.05968	2	8.29534	69	7.8362	10.6968
Q9BR76	Coronin-1B OS=Homo sapiens GN=CORO1B PE=1 SV=1 - [COR1B_HUMAN]	13.5377	14.31	1	4	4	4	1.8673e+06	0.689769	4	6.85863	489	54.2003	5.88428
P61978	Heterogeneous nuclear ribonucleoprotein K OS=Homo sapiens GN=HNRNPK PE=1 SV=1 - [HNRPK_HUMAN]	13.4232	12.74	1	4	4	4	1.07581e+06	0.799144	4	18.9146	463	50.9444	5.5415
Q96CW1	AP-2 complex subunit mu OS=Homo sapiens GN=AP2M1 PE=1 SV=2 - [AP2M1_HUMAN]	13.3696	5.98	1	3	3	5	1.31251e+06	1.08102	2	9.03058	435	49.623	9.53955
P62851	40S ribosomal protein S25 OS=Homo sapiens GN=RPS25 PE=1 SV=1 - [RS25_HUMAN]	13.3424	15.2	1	2	2	4	7.15249e+06	1.20057	2	25.8526	125	13.7337	10.1108
P06703	Protein S100-A6 OS=Homo sapiens GN=S100A6 PE=1 SV=1 - [S10A6_HUMAN]	13.3177	16.67	1	2	2	5	8.35378e+06	1.32569	2	2.97232	90	10.1733	5.47803
Q9H3K6	BolA-like protein 2 OS=Homo sapiens GN=BOLA2 PE=1 SV=1 - [BOLA2_HUMAN]	13.296	18.6	1	1	1	3	3.81361e+06	1.06878	1		86	10.1102	6.52197
P56134	ATP synthase subunit f, mitochondrial OS=Homo sapiens GN=ATP5J2 PE=1 SV=3 - [ATPK_HUMAN]	13.0758	25.53	1	2	2	4	1.66167e+06	1.32672	2	3.9337	94	10.9107	9.67139
P43487	Ran-specific GTPase-activating protein OS=Homo sapiens GN=RANBP1 PE=1 SV=1 - [RANG_HUMAN]	13.0018	15.42	1	3	3	4	1.82608e+06	1.02289	2	14.3095	201	23.2956	5.2876
P06396	Gelsolin OS=Homo sapiens GN=GSN PE=1 SV=1 - [GELS_HUMAN]	12.9149	5.24	1	2	2	4	2.15481e+06	0.771927	2	25.9162	782	85.6442	6.27783
O00401	Neural Wiskott-Aldrich syndrome protein OS=Homo sapiens GN=WASL PE=1 SV=2 - [WASL_HUMAN]	12.8395	13.86	1	4	4	6	1.50579e+06	1.069	3	0.358755	505	54.7927	7.92822
O60518	Ran-binding protein 6 OS=Homo sapiens GN=RANBP6 PE=1 SV=2 - [RNBP6_HUMAN]	12.8025	1.9	1	1	2	8	756555				1105	124.633	5.0083
Q15287	RNA-binding protein with serine-rich domain 1 OS=Homo sapiens GN=RNPS1 PE=1 SV=1 - [RNPS1_HUMAN]	12.606	4.92	1	1	1	3	1.22513e+06	0.858728	1		305	34.1877	11.8394
O00148	ATP-dependent RNA helicase DDX39A OS=Homo sapiens GN=DDX39A PE=1 SV=2 - [DX39A_HUMAN]	12.5634	5.62	2	2	2	3	2.21382e+06	0.735296	2	41.8309	427	49.098	5.68115
P04843	Dolichyl-diphosphooligosaccharide--protein glycosyltransferase subunit 1 OS=Homo sapiens GN=RPN1 PE=1 SV=1 - [RPN1_HUMAN]	12.5411	7.74	1	4	4	4	1.12426e+06	1.15173	3	2.64345	607	68.5268	6.37939
Q01650	Large neutral amino acids transporter small subunit 1 OS=Homo sapiens GN=SLC7A5 PE=1 SV=2 - [LAT1_HUMAN]	12.2647	3.55	1	1	1	3	2.05908e+06	1.12588	1		507	54.9743	7.72314
O15143	Actin-related protein 2/3 complex subunit 1B OS=Homo sapiens GN=ARPC1B PE=1 SV=3 - [ARC1B_HUMAN]	12.2472	11.02	1	3	3	4	1.93539e+06	1.07222	2	39.8446	372	40.9234	8.35303
Q14103	Heterogeneous nuclear ribonucleoprotein D0 OS=Homo sapiens GN=HNRNPD PE=1 SV=1 - [HNRPD_HUMAN]	12.2115	3.94	1	1	1	3	1.22819e+06	0.525883	1		355	38.4103	7.81104
Q9HCM4	Band 4.1-like protein 5 OS=Homo sapiens GN=EPB41L5 PE=1 SV=3 - [E41L5_HUMAN]	12.1487	5.05	2	3	3	4	1.1248e+06	0.924183	3	20.3603	733	81.8049	6.58057
P47914	60S ribosomal protein L29 OS=Homo sapiens GN=RPL29 PE=1 SV=2 - [RL29_HUMAN]	11.9324	9.43	1	1	1	3	3.73032e+06	0.89274	1		159	17.7411	11.6636
Q96HC4	PDZ and LIM domain protein 5 OS=Homo sapiens GN=PDLIM5 PE=1 SV=5 - [PDLI5_HUMAN]	11.9314	6.38	1	3	3	4	1.62575e+06	0.813066	3	8.38348	596	63.9045	8.20654
Q96S99	Pleckstrin homology domain-containing family F member 1 OS=Homo sapiens GN=PLEKHF1 PE=1 SV=3 - [PKHF1_HUMAN]	11.9167	15.77	2	3	3	4	1.1411e+06	1.02358	3	10.419	279	31.1747	8.23584
P62906	60S ribosomal protein L10a OS=Homo sapiens GN=RPL10A PE=1 SV=2 - [RL10A_HUMAN]	11.8847	23.5	1	4	4	5	1.37854e+06	1.30918	4	5.57349	217	24.8155	9.93506
P27635	60S ribosomal protein L10 OS=Homo sapiens GN=RPL10 PE=1 SV=4 - [RL10_HUMAN]	11.8752	10.28	1	2	2	4	3.10833e+06	1.06857	2	7.53258	214	24.5879	10.0815
Q9Y6U3	Adseverin OS=Homo sapiens GN=SCIN PE=1 SV=4 - [ADSV_HUMAN]	11.8306	5.59	1	3	3	3	839020	0.903786	2	8.86182	715	80.4384	5.70654
Q96RT1	Protein LAP2 OS=Homo sapiens GN=ERBB2IP PE=1 SV=2 - [LAP2_HUMAN]	11.8042	3.61	1	3	3	5	311306	0.825025	3	15.2857	1412	158.2	5.50342
Q13405	39S ribosomal protein L49, mitochondrial OS=Homo sapiens GN=MRPL49 PE=1 SV=1 - [RM49_HUMAN]	11.7944	15.66	1	2	2	3	576865	1.0271	1		166	19.1859	9.45166
P35232	Prohibitin OS=Homo sapiens GN=PHB PE=1 SV=1 - [PHB_HUMAN]	11.7653	11.4	1	3	3	4	1.2213e+06	1.11518	3	1.58571	272	29.7859	5.75732
P55072	Transitional endoplasmic reticulum ATPase OS=Homo sapiens GN=VCP PE=1 SV=4 - [TERA_HUMAN]	11.7207	3.23	1	2	2	4	476279	0.883732	2	3.07843	806	89.2657	5.26221
P02452	Collagen alpha-1(I) chain OS=Homo sapiens GN=COL1A1 PE=1 SV=5 - [CO1A1_HUMAN]	11.7168	3.55	1	3	3	4	8.5809e+06				1464	138.857	5.79541
O00186	Syntaxin-binding protein 3 OS=Homo sapiens GN=STXBP3 PE=1 SV=2 - [STXB3_HUMAN]	11.6968	6.59	1	4	4	4	1.08049e+06	1.09616	4	7.15035	592	67.7208	7.79639
P06753	Tropomyosin alpha-3 chain OS=Homo sapiens GN=TPM3 PE=1 SV=2 - [TPM3_HUMAN]	11.5348	14.04	4	3	3	4	1.33104e+06	0.86509	3	1.81116	285	32.9298	4.71631
Q16643	Drebrin OS=Homo sapiens GN=DBN1 PE=1 SV=4 - [DREB_HUMAN]	11.4849	9.09	1	3	3	4	1.4337e+06	0.605238	2	2.17063	649	71.3854	4.44971
Q9NVD7	Alpha-parvin OS=Homo sapiens GN=PARVA PE=1 SV=1 - [PARVA_HUMAN]	11.4682	8.06	1	2	2	3	368627	0.742702	2	24.4431	372	42.2174	5.94775
Q96HS1	Serine/threonine-protein phosphatase PGAM5, mitochondrial OS=Homo sapiens GN=PGAM5 PE=1 SV=2 - [PGAM5_HUMAN]	11.419	9.69	1	3	3	4	1.3861e+06	0.957786	3	12.8797	289	31.9846	8.67529
Q13185	Chromobox protein homolog 3 OS=Homo sapiens GN=CBX3 PE=1 SV=4 - [CBX3_HUMAN]	11.3581	14.75	1	2	2	3	989552	1.11126	3	30.1198	183	20.7984	5.32568
P61106	Ras-related protein Rab-14 OS=Homo sapiens GN=RAB14 PE=1 SV=4 - [RAB14_HUMAN]	11.3205	19.07	16	1	2	4	5.25012e+06	1.22547	1		215	23.8819	6.21436
P51570	Galactokinase OS=Homo sapiens GN=GALK1 PE=1 SV=1 - [GALK1_HUMAN]	11.301	10.97	1	3	3	3	1.20339e+06	0.843589	3	67.7369	392	42.2456	6.45557
P52735	Guanine nucleotide exchange factor VAV2 OS=Homo sapiens GN=VAV2 PE=1 SV=2 - [VAV2_HUMAN]	11.2481	3.76	1	2	2	3	670626	0.697908	2	0.91339	878	101.224	7.07861
Q9ULC4	Malignant T-cell-amplified sequence 1 OS=Homo sapiens GN=MCTS1 PE=1 SV=1 - [MCTS1_HUMAN]	11.2137	9.39	1	1	1	4	306593	1.10198	1		181	20.5418	8.82178
Q92499	ATP-dependent RNA helicase DDX1 OS=Homo sapiens GN=DDX1 PE=1 SV=2 - [DDX1_HUMAN]	11.179	5.27	1	2	2	3	527723	0.90787	1		740	82.3798	7.2251
Q06210	Glutamine--fructose-6-phosphate aminotransferase [isomerizing] 1 OS=Homo sapiens GN=GFPT1 PE=1 SV=3 - [GFPT1_HUMAN]	11.1142	4.01	1	2	2	3	648712	1.43425	2	63.2664	699	78.7563	7.10791
P63000	Ras-related C3 botulinum toxin substrate 1 OS=Homo sapiens GN=RAC1 PE=1 SV=1 - [RAC1_HUMAN]	11.0515	11.98	3	3	3	4	4.39608e+06	1.24724	3	1.65535	192	21.4362	8.49951
Q6P9B6	TLD domain-containing protein 1 OS=Homo sapiens GN=TLDC1 PE=1 SV=2 - [TLDC1_HUMAN]	11.0188	9.21	1	2	2	4	1.33622e+06	1.6205	1		456	50.9611	6.23975
Q9NVA2	Septin-11 OS=Homo sapiens GN=SEPT11 PE=1 SV=3 - [SEP11_HUMAN]	10.9781	8.39	4	1	3	4	1.14713e+06	1.50458	1		429	49.3672	6.81494
Q99714	3-hydroxyacyl-CoA dehydrogenase type-2 OS=Homo sapiens GN=HSD17B10 PE=1 SV=3 - [HCD2_HUMAN]	10.9187	16.48	1	2	2	3	613910	1.16433	2	1.2394	261	26.9061	7.78174
Q9BRA2	Thioredoxin domain-containing protein 17 OS=Homo sapiens GN=TXNDC17 PE=1 SV=1 - [TXD17_HUMAN]	10.8891	11.38	1	1	1	3	2.2792e+06	1.14397	1		123	13.9318	5.51611
O15144	Actin-related protein 2/3 complex subunit 2 OS=Homo sapiens GN=ARPC2 PE=1 SV=1 - [ARPC2_HUMAN]	10.8545	13.67	1	3	3	4	1.21223e+06	0.878745	3	13.0804	300	34.3115	7.35693
O75531	Barrier-to-autointegration factor OS=Homo sapiens GN=BANF1 PE=1 SV=1 - [BAF_HUMAN]	10.782	26.97	1	1	1	2	4.4886e+06	0.941026	1		89	10.052	6.0874
O14908	PDZ domain-containing protein GIPC1 OS=Homo sapiens GN=GIPC1 PE=1 SV=2 - [GIPC1_HUMAN]	10.6865	12.61	1	3	3	3	546484	1.36765	2	9.88792	333	36.0267	6.27783
Q9UJS0	Calcium-binding mitochondrial carrier protein Aralar2 OS=Homo sapiens GN=SLC25A13 PE=1 SV=2 - [CMC2_HUMAN]	10.6064	5.93	1	3	3	3	1.09589e+06	0.824774	2	2.80586	675	74.1286	8.6167
P62917	60S ribosomal protein L8 OS=Homo sapiens GN=RPL8 PE=1 SV=2 - [RL8_HUMAN]	10.604	4.28	1	1	1	3	4.09002e+06	1.05971	1		257	28.0073	11.0337
O15530	3-phosphoinositide-dependent protein kinase 1 OS=Homo sapiens GN=PDPK1 PE=1 SV=1 - [PDPK1_HUMAN]	10.6027	8.99	2	3	3	4	1.22841e+06	1.72517	2	89.6466	556	63.112	7.35693
P53992	Protein transport protein Sec24C OS=Homo sapiens GN=SEC24C PE=1 SV=3 - [SC24C_HUMAN]	10.5103	3.02	1	2	2	4	437401	1.0663	1		1094	118.249	7.06396
Q92973	Transportin-1 OS=Homo sapiens GN=TNPO1 PE=1 SV=2 - [TNPO1_HUMAN]	10.4573	5.23	2	3	3	4	851132	0.784837	3	18.2463	898	102.289	4.98291
Q92597	Protein NDRG1 OS=Homo sapiens GN=NDRG1 PE=1 SV=1 - [NDRG1_HUMAN]	10.427	9.9	1	2	2	3	1.30591e+06	0.985709	3	33.0573	394	42.8077	5.8208
P46778	60S ribosomal protein L21 OS=Homo sapiens GN=RPL21 PE=1 SV=2 - [RL21_HUMAN]	10.3285	9.38	1	1	1	3	5.38032e+06	0.960786	2	1.27758	160	18.5531	10.4917
P17858	ATP-dependent 6-phosphofructokinase, liver type OS=Homo sapiens GN=PFKL PE=1 SV=6 - [PFKAL_HUMAN]	10.3019	2.44	2	1	1	2	818694	1.30936	1		780	84.9642	7.50342
P21266	Glutathione S-transferase Mu 3 OS=Homo sapiens GN=GSTM3 PE=1 SV=3 - [GSTM3_HUMAN]	10.2305	17.33	3	3	3	4	1.04663e+06	1.07359	3	10.9078	225	26.5421	5.5415
Q15056	Eukaryotic translation initiation factor 4H OS=Homo sapiens GN=EIF4H PE=1 SV=5 - [IF4H_HUMAN]	10.2204	17.34	1	2	2	4	860863	0.979916	2	7.11723	248	27.3684	7.2251
Q8IVT2	Mitotic interactor and substrate of PLK1 OS=Homo sapiens GN=MISP PE=1 SV=1 - [MISP_HUMAN]	10.1426	4.57	1	2	2	3	406119				679	75.311	6.82959
P48643	T-complex protein 1 subunit epsilon OS=Homo sapiens GN=CCT5 PE=1 SV=1 - [TCPE_HUMAN]	10.125	4.62	1	2	2	3	1.45527e+06	0.760037	3	17.8968	541	59.6328	5.65576
P26196	Probable ATP-dependent RNA helicase DDX6 OS=Homo sapiens GN=DDX6 PE=1 SV=2 - [DDX6_HUMAN]	9.98283	12.42	1	3	3	4	519453	0.952987	2	6.92593	483	54.3823	8.66064
P20042	Eukaryotic translation initiation factor 2 subunit 2 OS=Homo sapiens GN=EIF2S2 PE=1 SV=2 - [IF2B_HUMAN]	9.96817	6.01	1	1	1	3	1.53431e+06	1.07266	1		333	38.3644	5.79541
P52907	F-actin-capping protein subunit alpha-1 OS=Homo sapiens GN=CAPZA1 PE=1 SV=3 - [CAZA1_HUMAN]	9.95514	14.34	1	2	3	3	1.62139e+06	0.794702	2	8.68105	286	32.9023	5.69385
P62899	60S ribosomal protein L31 OS=Homo sapiens GN=RPL31 PE=1 SV=1 - [RL31_HUMAN]	9.82697	24.8	1	3	3	3	2.66797e+06	0.986969	2	0.364672	125	14.4539	10.5356
P54136	Arginine--tRNA ligase, cytoplasmic OS=Homo sapiens GN=RARS PE=1 SV=2 - [SYRC_HUMAN]	9.7966	5.76	1	3	3	3	838229	1.03527	2	14.1304	660	75.3309	6.68311
P82673	28S ribosomal protein S35, mitochondrial OS=Homo sapiens GN=MRPS35 PE=1 SV=1 - [RT35_HUMAN]	9.78329	3.1	1	1	1	3	305479				323	36.8211	8.23584
P61513	60S ribosomal protein L37a OS=Homo sapiens GN=RPL37A PE=1 SV=2 - [RL37A_HUMAN]	9.65957	19.57	1	1	1	2	3.22933e+06	0.952244	1		92	10.2685	10.4331
P07237	Protein disulfide-isomerase OS=Homo sapiens GN=P4HB PE=1 SV=3 - [PDIA1_HUMAN]	9.54822	7.48	1	3	3	3	662636	1.23993	1		508	57.0807	4.86865
P06493	Cyclin-dependent kinase 1 OS=Homo sapiens GN=CDK1 PE=1 SV=3 - [CDK1_HUMAN]	9.45786	11.78	23	2	3	3	1.0662e+06	0.86815	2	23.7912	297	34.0739	8.39697
P07477	Trypsin-1 OS=Homo sapiens GN=PRSS1 PE=1 SV=1 - [TRY1_HUMAN]	9.45729	4.05	1	1	1	3	2.63527e+07				247	26.5411	6.50732
Q9P206	Uncharacterized protein KIAA1522 OS=Homo sapiens GN=KIAA1522 PE=1 SV=2 - [K1522_HUMAN]	9.38278	6.96	1	4	4	4	1.45531e+06	0.64484	4	3.04005	1035	107.03	9.72998
P46776	60S ribosomal protein L27a OS=Homo sapiens GN=RPL27A PE=1 SV=2 - [RL27A_HUMAN]	9.36395	14.19	1	2	2	3	6.43513e+06	1.3993	2	32.008	148	16.551	11.0044
P51398	28S ribosomal protein S29, mitochondrial OS=Homo sapiens GN=DAP3 PE=1 SV=1 - [RT29_HUMAN]	9.35639	5.03	1	1	1	4	219308	0.935306	2	10.5056	398	45.5376	8.88037
Q16678	Cytochrome P450 1B1 OS=Homo sapiens GN=CYP1B1 PE=1 SV=2 - [CP1B1_HUMAN]	9.34442	6.08	1	2	2	3	488636	0.770117	2	36.9986	543	60.8073	8.98291
Q99426	Tubulin-folding cofactor B OS=Homo sapiens GN=TBCB PE=1 SV=2 - [TBCB_HUMAN]	9.33179	8.2	1	2	2	3	1.00248e+06	0.994869	2	14.7784	244	27.3085	5.14795
P58546	Myotrophin OS=Homo sapiens GN=MTPN PE=1 SV=2 - [MTPN_HUMAN]	9.31592	14.41	1	1	1	2	909654	1.06266	1		118	12.8866	5.51611
P18621	60S ribosomal protein L17 OS=Homo sapiens GN=RPL17 PE=1 SV=3 - [RL17_HUMAN]	9.26846	20.11	1	3	3	3	2.1015e+06	0.984178	3	0.930992	184	21.3833	10.1694
P84098	60S ribosomal protein L19 OS=Homo sapiens GN=RPL19 PE=1 SV=1 - [RL19_HUMAN]	9.1062	8.67	1	1	1	2	1.16561e+06	1.30683	1		196	23.4512	11.4731
Q9NZW5	MAGUK p55 subfamily member 6 OS=Homo sapiens GN=MPP6 PE=1 SV=2 - [MPP6_HUMAN]	9.07936	6.48	1	2	2	3	543061	0.790648	2	7.79444	540	61.0788	6.17627
Q9H3U1	Protein unc-45 homolog A OS=Homo sapiens GN=UNC45A PE=1 SV=1 - [UN45A_HUMAN]	9.02872	3.5	1	3	3	3	633678	1.00965	1		944	103.011	6.07471
Q02878	60S ribosomal protein L6 OS=Homo sapiens GN=RPL6 PE=1 SV=3 - [RL6_HUMAN]	8.95636	9.03	1	3	3	4	1.85354e+06	1.04017	2	7.74635	288	32.7076	10.5796
Q8IZP2	Putative protein FAM10A4 OS=Homo sapiens GN=ST13P4 PE=5 SV=1 - [ST134_HUMAN]	8.9042	5.83	2	1	1	2	872662	1.08457	1		240	27.3897	5.08447
P04632	Calpain small subunit 1 OS=Homo sapiens GN=CAPNS1 PE=1 SV=1 - [CPNS1_HUMAN]	8.84272	8.96	1	1	1	2	1.2926e+06	0.860219	1		268	28.2977	5.19873
Q99471	Prefoldin subunit 5 OS=Homo sapiens GN=PFDN5 PE=1 SV=2 - [PFD5_HUMAN]	8.83912	11.69	1	1	1	3	290750	1.18808	1		154	17.317	6.32861
Q9UQ80	Proliferation-associated protein 2G4 OS=Homo sapiens GN=PA2G4 PE=1 SV=3 - [PA2G4_HUMAN]	8.83597	11.17	1	3	3	3	1.59768e+06	1.14746	1		394	43.7592	6.55127
P47756	F-actin-capping protein subunit beta OS=Homo sapiens GN=CAPZB PE=1 SV=4 - [CAPZB_HUMAN]	8.79424	12.27	1	2	2	2	1.70576e+06	0.869253	2	0.854613	277	31.3308	5.59229
O60716	Catenin delta-1 OS=Homo sapiens GN=CTNND1 PE=1 SV=1 - [CTND1_HUMAN]	8.79123	4.96	1	3	3	6	771980	0.773529	3	11.7207	968	108.103	6.22705
P15559	NAD(P)H dehydrogenase [quinone] 1 OS=Homo sapiens GN=NQO1 PE=1 SV=1 - [NQO1_HUMAN]	8.66563	4.74	1	1	1	3	506495	1.59858	1		274	30.848	8.88037
P0CG48	Polyubiquitin-C OS=Homo sapiens GN=UBC PE=1 SV=3 - [UBC_HUMAN]	8.61709	21.02	4	1	1	2	3.32984e+06	1.4047	1		685	76.9915	7.66455
Q9H7E9	UPF0488 protein C8orf33 OS=Homo sapiens GN=C8orf33 PE=1 SV=1 - [CH033_HUMAN]	8.55595	6.99	1	1	1	2	429168	1.10456	1		229	24.9769	9.94971
P26640	Valine--tRNA ligase OS=Homo sapiens GN=VARS PE=1 SV=4 - [SYVC_HUMAN]	8.54324	4.91	1	4	4	7	884429	0.747621	4	20.1178	1264	140.387	7.59131
Q93084	Sarcoplasmic/endoplasmic reticulum calcium ATPase 3 OS=Homo sapiens GN=ATP2A3 PE=1 SV=2 - [AT2A3_HUMAN]	8.53868	1.44	1	1	1	2	793931	0.928294	1		1043	113.904	5.56689
Q10567	AP-1 complex subunit beta-1 OS=Homo sapiens GN=AP1B1 PE=1 SV=2 - [AP1B1_HUMAN]	8.53589	4.32	2	3	3	4	671171	0.977903	3	10.552	949	104.57	5.05908
Q6WKZ4	Rab11 family-interacting protein 1 OS=Homo sapiens GN=RAB11FIP1 PE=1 SV=3 - [RFIP1_HUMAN]	8.52687	3.12	2	3	3	3	559733	1.28471	3	11.85	1283	137.083	5.42725
P22626	Heterogeneous nuclear ribonucleoproteins A2/B1 OS=Homo sapiens GN=HNRNPA2B1 PE=1 SV=2 - [ROA2_HUMAN]	8.5162	9.35	1	3	3	3	575914	0.967005	2	0.936471	353	37.4067	8.95361
P30049	ATP synthase subunit delta, mitochondrial OS=Homo sapiens GN=ATP5D PE=1 SV=2 - [ATPD_HUMAN]	8.45052	8.33	1	1	1	2	786082	1.21516	1		168	17.4792	5.49072
Q00839	Heterogeneous nuclear ribonucleoprotein U OS=Homo sapiens GN=HNRNPU PE=1 SV=6 - [HNRPU_HUMAN]	8.44755	3.88	1	1	1	2	1.12374e+06	0.733435	1		825	90.528	5.99854
P05388	60S acidic ribosomal protein P0 OS=Homo sapiens GN=RPLP0 PE=1 SV=1 - [RLA0_HUMAN]	8.29875	5.05	1	1	1	2	2.11641e+06	1.25048	1		317	34.2518	5.97314
P39019	40S ribosomal protein S19 OS=Homo sapiens GN=RPS19 PE=1 SV=2 - [RS19_HUMAN]	8.29044	20	1	3	3	3	2.51629e+06	1.10702	3	8.10354	145	16.0505	10.3159
P08651	Nuclear factor 1 C-type OS=Homo sapiens GN=NFIC PE=1 SV=2 - [NFIC_HUMAN]	8.22007	4.92	4	2	2	3	3.27272e+06	0.602715	2	13.1908	508	55.64	8.38232
P40429	60S ribosomal protein L13a OS=Homo sapiens GN=RPL13A PE=1 SV=2 - [RL13A_HUMAN]	8.2165	9.36	2	2	2	3	2.10099e+06	0.866803	2	8.58396	203	23.5624	10.9312
Q96P70	Importin-9 OS=Homo sapiens GN=IPO9 PE=1 SV=3 - [IPO9_HUMAN]	8.15251	4.42	1	2	2	3	619422	0.8199	2	5.84706	1041	115.889	4.80518
P08559	Pyruvate dehydrogenase E1 component subunit alpha, somatic form, mitochondrial OS=Homo sapiens GN=PDHA1 PE=1 SV=3 - [ODPA_HUMAN]	8.11736	3.33	1	1	1	2					390	43.2676	8.06006
P54760	Ephrin type-B receptor 4 OS=Homo sapiens GN=EPHB4 PE=1 SV=2 - [EPHB4_HUMAN]	8.11492	2.43	11	2	2	3	599748	1.37079	1		987	108.201	6.90283
P62854	40S ribosomal protein S26 OS=Homo sapiens GN=RPS26 PE=1 SV=3 - [RS26_HUMAN]	8.11382	7.83	2	1	1	3	6.09257e+06	1.0639	1		115	13.0071	11.0044
Q92882	Osteoclast-stimulating factor 1 OS=Homo sapiens GN=OSTF1 PE=1 SV=2 - [OSTF1_HUMAN]	8.10438	5.61	1	1	1	2	270589	0.656833	1		214	23.7719	5.68115
Q9Y4P3	Transducin beta-like protein 2 OS=Homo sapiens GN=TBL2 PE=1 SV=1 - [TBL2_HUMAN]	8.04485	2.91	1	1	1	2	1.86076e+06	0.402152	1		447	49.7662	9.43701
P49588	Alanine--tRNA ligase, cytoplasmic OS=Homo sapiens GN=AARS PE=1 SV=2 - [SYAC_HUMAN]	8.0383	1.45	1	1	1	2	382167	1.09724	1		968	106.743	5.52881
Q9NTK5	Obg-like ATPase 1 OS=Homo sapiens GN=OLA1 PE=1 SV=2 - [OLA1_HUMAN]	8.01617	3.79	1	1	1	2	526826	1.27676	1		396	44.7153	7.81104
O60346	PH domain leucine-rich repeat-containing protein phosphatase 1 OS=Homo sapiens GN=PHLPP1 PE=1 SV=3 - [PHLP1_HUMAN]	8.00924	1.69	1	1	1	3	110205	0.878358	1		1717	184.556	6.27783
P05386	60S acidic ribosomal protein P1 OS=Homo sapiens GN=RPLP1 PE=1 SV=1 - [RLA1_HUMAN]	7.99446	14.04	1	1	1	2	2.70628e+06	1.10495	1		114	11.5067	4.32275
P62273	40S ribosomal protein S29 OS=Homo sapiens GN=RPS29 PE=1 SV=2 - [RS29_HUMAN]	7.97047	14.29	1	1	1	3	5.32826e+06	0.991364	1		56	6.6723	10.1255
Q8TC12	Retinol dehydrogenase 11 OS=Homo sapiens GN=RDH11 PE=1 SV=2 - [RDH11_HUMAN]	7.90491	4.4	1	1	1	2	503200	0.799648	1		318	35.3634	8.82178
P62750	60S ribosomal protein L23a OS=Homo sapiens GN=RPL23A PE=1 SV=1 - [RL23A_HUMAN]	7.89836	25.64	1	3	3	3	1.91516e+06	1.09092	2	20.678	156	17.6841	10.4478
O76015	Keratin, type I cuticular Ha8 OS=Homo sapiens GN=KRT38 PE=1 SV=3 - [KRT38_HUMAN]	7.87135	3.95	7	1	2	3	1.61959e+07	0.953756	1		456	50.4474	4.84326
P27824	Calnexin OS=Homo sapiens GN=CANX PE=1 SV=2 - [CALX_HUMAN]	7.83963	4.22	1	2	2	2	1.16545e+06	1.26062	2	62.8161	592	67.5259	4.60205
Q9Y265	RuvB-like 1 OS=Homo sapiens GN=RUVBL1 PE=1 SV=1 - [RUVB1_HUMAN]	7.83511	9.65	1	3	3	3	3.06872e+06	0.76223	2	1.32255	456	50.1963	6.41748
P83731	60S ribosomal protein L24 OS=Homo sapiens GN=RPL24 PE=1 SV=1 - [RL24_HUMAN]	7.74728	13.38	1	2	2	2	4.00875e+06	1.24684	2	28.519	157	17.7679	11.2534
Q13136	Liprin-alpha-1 OS=Homo sapiens GN=PPFIA1 PE=1 SV=1 - [LIPA1_HUMAN]	7.72936	1.25	1	1	1	2	753085	1.02279	1		1202	135.695	6.29053
P55209	Nucleosome assembly protein 1-like 1 OS=Homo sapiens GN=NAP1L1 PE=1 SV=1 - [NP1L1_HUMAN]	7.68837	7.42	1	2	2	4	2.3715e+06	0.797544	2	30.3404	391	45.3459	4.4624
Q9Y295	Developmentally-regulated GTP-binding protein 1 OS=Homo sapiens GN=DRG1 PE=1 SV=1 - [DRG1_HUMAN]	7.638	3.81	1	1	1	2	527597	1.0538	1		367	40.5168	8.89502
Q9UI30	Multifunctional methyltransferase subunit TRM112-like protein OS=Homo sapiens GN=TRMT112 PE=1 SV=1 - [TR112_HUMAN]	7.58363	22.4	1	2	2	2	547945	0.960908	1		125	14.1903	5.26221
P47755	F-actin-capping protein subunit alpha-2 OS=Homo sapiens GN=CAPZA2 PE=1 SV=3 - [CAZA2_HUMAN]	7.47969	9.79	1	1	2	2	3.1749e+06	0.60581	1		286	32.9286	5.84619
Q9NWB6	Arginine and glutamate-rich protein 1 OS=Homo sapiens GN=ARGLU1 PE=1 SV=1 - [ARGL1_HUMAN]	7.37094	8.42	1	3	3	3	1.11688e+06	0.636872	3	5.54909	273	33.1968	10.3452
P30153	Serine/threonine-protein phosphatase 2A 65 kDa regulatory subunit A alpha isoform OS=Homo sapiens GN=PPP2R1A PE=1 SV=4 - [2AAA_HUMAN]	7.3527	9.85	2	3	3	3	828176	1.01551	3	0.97209	589	65.2669	5.10986
Q8WUF5	RelA-associated inhibitor OS=Homo sapiens GN=PPP1R13L PE=1 SV=4 - [IASPP_HUMAN]	7.34416	2.78	1	1	1	2	520772	1.04352	1		828	89.0357	6.81494
Q6NXT2	Histone H3.3C OS=Homo sapiens GN=H3F3C PE=1 SV=3 - [H3C_HUMAN]	7.25653	11.85	5	2	2	3	3.83207e+06	0.947322	2	1.86889	135	15.2044	11.1069
Q13155	Aminoacyl tRNA synthase complex-interacting multifunctional protein 2 OS=Homo sapiens GN=AIMP2 PE=1 SV=2 - [AIMP2_HUMAN]	7.20522	7.81	1	1	1	2	841665	1.75282	1		320	35.3263	8.22119
O95573	Long-chain-fatty-acid--CoA ligase 3 OS=Homo sapiens GN=ACSL3 PE=1 SV=3 - [ACSL3_HUMAN]	7.17672	4.03	1	2	2	3	749895	0.875858	1		720	80.3683	8.38232
P26447	Protein S100-A4 OS=Homo sapiens GN=S100A4 PE=1 SV=1 - [S10A4_HUMAN]	7.14953	18.81	1	2	2	3	4.53207e+06	1.09116	2	19.1936	101	11.7207	6.11279
Q00610	Clathrin heavy chain 1 OS=Homo sapiens GN=CLTC PE=1 SV=5 - [CLH1_HUMAN]	7.12603	2.87	2	3	3	3	478314	1.26218	2	7.65112	1675	191.493	5.69385
Q07021	Complement component 1 Q subcomponent-binding protein, mitochondrial OS=Homo sapiens GN=C1QBP PE=1 SV=1 - [C1QBP_HUMAN]	7.12108	9.57	1	2	2	2	998839	1.2447	2	15.1356	282	31.3426	4.84326
P59998	Actin-related protein 2/3 complex subunit 4 OS=Homo sapiens GN=ARPC4 PE=1 SV=3 - [ARPC4_HUMAN]	7.09677	6.55	1	1	1	2	3.22933e+06	0.78156	1		168	19.6543	8.42627
P21964	Catechol O-methyltransferase OS=Homo sapiens GN=COMT PE=1 SV=2 - [COMT_HUMAN]	7.08534	4.43	1	1	1	2	2.59461e+06	0.936223	1		271	30.0176	5.46533
P62888	60S ribosomal protein L30 OS=Homo sapiens GN=RPL30 PE=1 SV=2 - [RL30_HUMAN]	7.08264	10.43	1	1	1	2	1.04561e+06	1.19807	2	1.55744	115	12.7757	9.62744
P50895	Basal cell adhesion molecule OS=Homo sapiens GN=BCAM PE=1 SV=2 - [BCAM_HUMAN]	7.06125	5.25	1	2	2	2	479479	0.852909	1		628	67.3626	5.80811
P61956	Small ubiquitin-related modifier 2 OS=Homo sapiens GN=SUMO2 PE=1 SV=3 - [SUMO2_HUMAN]	7.05431	12.63	3	1	1	2	605436	1.00604	1		95	10.8644	5.50342
P06702	Protein S100-A9 OS=Homo sapiens GN=S100A9 PE=1 SV=1 - [S10A9_HUMAN]	6.97891	11.4	1	1	1	2	1.60205e+06	0.290292	1		114	13.2335	6.12549
P09543	2',3'-cyclic-nucleotide 3'-phosphodiesterase OS=Homo sapiens GN=CNP PE=1 SV=2 - [CN37_HUMAN]	6.87895	8.31	1	2	2	2	2.4818e+06	0.967578	1		421	47.5487	9.0708
P08240	Signal recognition particle receptor subunit alpha OS=Homo sapiens GN=SRPR PE=1 SV=2 - [SRPR_HUMAN]	6.86503	4.23	1	2	2	2	478904	0.862278	1		638	69.7672	8.95361
P01859	Ig gamma-2 chain C region OS=Homo sapiens GN=IGHG2 PE=1 SV=2 - [IGHG2_HUMAN]	6.85992	2.15	4	1	1	3	6.31781e+07				326	35.8778	7.59131
P05198	Eukaryotic translation initiation factor 2 subunit 1 OS=Homo sapiens GN=EIF2S1 PE=1 SV=3 - [IF2A_HUMAN]	6.80567	3.81	1	1	1	2	1.30817e+06	1.08665	1		315	36.0894	5.08447
Q5I0G3	Putative malate dehydrogenase 1B OS=Homo sapiens GN=MDH1B PE=2 SV=1 - [MDH1B_HUMAN]	6.7796	3.86	1	1	1	2	1.33644e+07				518	58.6134	6.22705
P14868	Aspartate--tRNA ligase, cytoplasmic OS=Homo sapiens GN=DARS PE=1 SV=2 - [SYDC_HUMAN]	6.65834	3.99	1	1	1	2	1.35907e+06	1.03011	1		501	57.1	6.55127
Q9Y676	28S ribosomal protein S18b, mitochondrial OS=Homo sapiens GN=MRPS18B PE=1 SV=1 - [RT18B_HUMAN]	6.62899	13.95	1	2	2	2	687782				258	29.377	9.37842
P46779	60S ribosomal protein L28 OS=Homo sapiens GN=RPL28 PE=1 SV=3 - [RL28_HUMAN]	6.61449	8.03	1	1	1	2	4.20444e+06	0.833637	1		137	15.7377	12.0151
Q9UM00	Transmembrane and coiled-coil domain-containing protein 1 OS=Homo sapiens GN=TMCO1 PE=1 SV=1 - [TMCO1_HUMAN]	6.50736	7.98	1	1	1	2	1.25956e+06	0.668537	1		188	21.1612	9.74463
O94973	AP-2 complex subunit alpha-2 OS=Homo sapiens GN=AP2A2 PE=1 SV=2 - [AP2A2_HUMAN]	6.4438	2.02	2	2	2	2	632127	0.840072	1		939	103.895	6.96143
Q8ND30	Liprin-beta-2 OS=Homo sapiens GN=PPFIBP2 PE=1 SV=3 - [LIPB2_HUMAN]	6.42592	4.57	1	3	3	3	332890	0.657869	1		876	98.4823	6.26514
Q00325	Phosphate carrier protein, mitochondrial OS=Homo sapiens GN=SLC25A3 PE=1 SV=2 - [MPCP_HUMAN]	6.41075	3.31	1	1	1	2	1.92942e+06	0.983633	1		362	40.0687	9.37842
P52565	Rho GDP-dissociation inhibitor 1 OS=Homo sapiens GN=ARHGDIA PE=1 SV=3 - [GDIR1_HUMAN]	6.40242	15.2	1	2	2	2	2.18056e+06	1.35413	2	10.8406	204	23.1927	5.10986
P62491	Ras-related protein Rab-11A OS=Homo sapiens GN=RAB11A PE=1 SV=3 - [RB11A_HUMAN]	6.32994	12.04	2	2	2	2	1.48009e+06	1.405	2	17.8784	216	24.3784	6.56592
Q9NUP9	Protein lin-7 homolog C OS=Homo sapiens GN=LIN7C PE=1 SV=1 - [LIN7C_HUMAN]	6.24242	13.71	1	2	2	2	1.61217e+06	0.798495	2	5.78815	197	21.8205	8.42627
P29353	SHC-transforming protein 1 OS=Homo sapiens GN=SHC1 PE=1 SV=4 - [SHC1_HUMAN]	6.24039	9.78	1	2	2	2	495086	0.450077	2	20.8293	583	62.7825	6.44287
Q9H2K8	Serine/threonine-protein kinase TAO3 OS=Homo sapiens GN=TAOK3 PE=1 SV=2 - [TAOK3_HUMAN]	6.23553	2.34	3	2	2	2	887775	1.34708	1		898	105.34	7.29834
P50995	Annexin A11 OS=Homo sapiens GN=ANXA11 PE=1 SV=1 - [ANX11_HUMAN]	6.1193	4.16	1	2	2	2	470145	1.70095	2	56.7711	505	54.3551	7.6499
P41743	Protein kinase C iota type OS=Homo sapiens GN=PRKCI PE=1 SV=2 - [KPCI_HUMAN]	6.11787	5.37	1	2	2	2	300717				596	68.2183	5.84619
P11940	Polyadenylate-binding protein 1 OS=Homo sapiens GN=PABPC1 PE=1 SV=2 - [PABP1_HUMAN]	5.98403	4.87	3	2	2	2	333459	1.26984	1		636	70.6259	9.49561
Q9Y6E2	Basic leucine zipper and W2 domain-containing protein 2 OS=Homo sapiens GN=BZW2 PE=1 SV=1 - [BZW2_HUMAN]	5.95145	2.15	1	1	1	2	2.27768e+06	1.04666	1		419	48.132	6.68311
Q15437	Protein transport protein Sec23B OS=Homo sapiens GN=SEC23B PE=1 SV=2 - [SC23B_HUMAN]	5.94911	5.74	1	3	3	3	398927	1.13858	2	31.0062	767	86.4235	6.88818
P27816	Microtubule-associated protein 4 OS=Homo sapiens GN=MAP4 PE=1 SV=3 - [MAP4_HUMAN]	5.88601	2.43	1	2	2	2	350984	1.32327	2	7.85738	1152	120.93	5.42725
Q13418	Integrin-linked protein kinase OS=Homo sapiens GN=ILK PE=1 SV=2 - [ILK_HUMAN]	5.87963	2.21	1	1	1	2	848553	0.89624	1		452	51.3859	8.07471
Q9UHQ9	NADH-cytochrome b5 reductase 1 OS=Homo sapiens GN=CYB5R1 PE=1 SV=1 - [NB5R1_HUMAN]	5.872	6.23	1	2	2	2	1.29105e+06	0.952948	1		305	34.0732	9.37842
P42765	3-ketoacyl-CoA thiolase, mitochondrial OS=Homo sapiens GN=ACAA2 PE=1 SV=2 - [THIM_HUMAN]	5.85816	8.82	1	2	2	2	416811	1.10766	1		397	41.8976	8.08936
Q14254	Flotillin-2 OS=Homo sapiens GN=FLOT2 PE=1 SV=2 - [FLOT2_HUMAN]	5.84446	5.84	1	2	2	2	292645				428	47.0347	5.24951
Q15147	1-phosphatidylinositol 4,5-bisphosphate phosphodiesterase beta-4 OS=Homo sapiens GN=PLCB4 PE=1 SV=3 - [PLCB4_HUMAN]	5.80825	2.21	1	1	1	2	982375	0.996751	1		1175	134.378	6.90283
Q9Y266	Nuclear migration protein nudC OS=Homo sapiens GN=NUDC PE=1 SV=1 - [NUDC_HUMAN]	5.80272	6.04	1	2	2	2	843137	1.23768	2	9.79919	331	38.2191	5.37646
Q9Y3A5	Ribosome maturation protein SBDS OS=Homo sapiens GN=SBDS PE=1 SV=4 - [SBDS_HUMAN]	5.78228	7.2	1	2	2	2	484289	1.40876	1		250	28.7453	8.74854
Q27J81	Inverted formin-2 OS=Homo sapiens GN=INF2 PE=1 SV=2 - [INF2_HUMAN]	5.76074	2.72	1	2	2	2	231489	0.945422	2	40.6501	1249	135.54	5.37646
P63173	60S ribosomal protein L38 OS=Homo sapiens GN=RPL38 PE=1 SV=2 - [RL38_HUMAN]	5.73364	17.14	1	1	1	2	4.15664e+06	1.01253	2	14.5356	70	8.21273	10.0962
Q9UQ35	Serine/arginine repetitive matrix protein 2 OS=Homo sapiens GN=SRRM2 PE=1 SV=2 - [SRRM2_HUMAN]	5.5996	0.8	1	2	2	2	1.65205e+06	1.1543	2	11.8997	2752	299.438	12.0591
P51648	Fatty aldehyde dehydrogenase OS=Homo sapiens GN=ALDH3A2 PE=1 SV=1 - [AL3A2_HUMAN]	5.57423	2.47	1	1	1	2	483560	1.07094	1		485	54.8129	7.88428
P22059	Oxysterol-binding protein 1 OS=Homo sapiens GN=OSBP PE=1 SV=1 - [OSBP1_HUMAN]	5.55846	3.1	1	2	2	2	631098	0.829526	2	14.2692	807	89.3646	7.29834
A0FGR8	Extended synaptotagmin-2 OS=Homo sapiens GN=ESYT2 PE=1 SV=1 - [ESYT2_HUMAN]	5.54732	1.95	1	2	2	2	632699	1.11781	2	62.5481	921	102.294	9.26123
P51114	Fragile X mental retardation syndrome-related protein 1 OS=Homo sapiens GN=FXR1 PE=1 SV=3 - [FXR1_HUMAN]	5.54421	4.35	2	2	2	2	572769	1.08567	1		621	69.6779	6.15088
Q96IU4	Alpha/beta hydrolase domain-containing protein 14B OS=Homo sapiens GN=ABHD14B PE=1 SV=1 - [ABHEB_HUMAN]	5.54158	16.67	1	2	2	2	1.48285e+06	0.994379	1		210	22.3316	6.40479
Q9UH65	Switch-associated protein 70 OS=Homo sapiens GN=SWAP70 PE=1 SV=1 - [SWP70_HUMAN]	5.537	3.25	1	2	2	2	864067	1.34518	1		585	68.9545	5.87158
P46777	60S ribosomal protein L5 OS=Homo sapiens GN=RPL5 PE=1 SV=3 - [RL5_HUMAN]	5.53591	4.71	1	1	1	2	2.35745e+06	1.17366	1		297	34.3407	9.71533
O95819	Mitogen-activated protein kinase kinase kinase kinase 4 OS=Homo sapiens GN=MAP4K4 PE=1 SV=2 - [M4K4_HUMAN]	5.53186	1.69	3	2	2	2	3.94315e+06				1239	142.013	7.45947
Q16629	Serine/arginine-rich splicing factor 7 OS=Homo sapiens GN=SRSF7 PE=1 SV=1 - [SRSF7_HUMAN]	5.52129	9.66	2	2	2	2	1.21003e+06	0.632394	2	8.08468	238	27.35	11.8247
O00483	Cytochrome c oxidase subunit NDUFA4 OS=Homo sapiens GN=NDUFA4 PE=1 SV=1 - [NDUA4_HUMAN]	5.48777	12.35	1	1	1	2	920532	0.838194	1		81	9.36391	9.37842
Q9UNF0	Protein kinase C and casein kinase substrate in neurons protein 2 OS=Homo sapiens GN=PACSIN2 PE=1 SV=2 - [PACN2_HUMAN]	5.46508	5.14	1	1	2	3	1.43447e+06	0.991615	1		486	55.7039	5.19873
Q99829	Copine-1 OS=Homo sapiens GN=CPNE1 PE=1 SV=1 - [CPNE1_HUMAN]	5.41654	3.72	1	1	1	3	350574	0.880964	1		537	59.0215	5.8335
Q969L2	Protein MAL2 OS=Homo sapiens GN=MAL2 PE=1 SV=1 - [MAL2_HUMAN]	5.39542	6.25	1	1	1	2	3.52167e+06	0.957667	1		176	19.1127	6.23975
Q04721	Neurogenic locus notch homolog protein 2 OS=Homo sapiens GN=NOTCH2 PE=1 SV=3 - [NOTC2_HUMAN]	5.36289	1.21	1	2	2	2	698522	0.873494	1		2471	265.226	5.13525
O75054	Immunoglobulin superfamily member 3 OS=Homo sapiens GN=IGSF3 PE=2 SV=3 - [IGSF3_HUMAN]	5.33208	3.43	1	2	2	2	490124	0.548085	1		1194	135.112	6.07471
Q7L2E3	Putative ATP-dependent RNA helicase DHX30 OS=Homo sapiens GN=DHX30 PE=1 SV=1 - [DHX30_HUMAN]	5.2725	1.51	1	1	1	2	170347	0.986485	1		1194	133.855	8.77783
P61966	AP-1 complex subunit sigma-1A OS=Homo sapiens GN=AP1S1 PE=1 SV=1 - [AP1S1_HUMAN]	5.26051	10.13	1	1	1	1	649162	1.14029	1		158	18.7206	5.73193
P49207	60S ribosomal protein L34 OS=Homo sapiens GN=RPL34 PE=1 SV=3 - [RL34_HUMAN]	5.24074	6.84	1	1	1	2	4.02848e+06	1.16736	1		117	13.2845	11.4731
P25398	40S ribosomal protein S12 OS=Homo sapiens GN=RPS12 PE=1 SV=3 - [RS12_HUMAN]	5.22793	7.58	1	1	1	2	2.12526e+06	1.20264	1		132	14.5055	7.21045
Q8TEX9	Importin-4 OS=Homo sapiens GN=IPO4 PE=1 SV=2 - [IPO4_HUMAN]	5.15902	1.85	1	2	2	2	443113	0.574509	1		1081	118.64	4.95752
P62191	26S protease regulatory subunit 4 OS=Homo sapiens GN=PSMC1 PE=1 SV=1 - [PRS4_HUMAN]	5.12813	5.68	3	2	2	2	1.05633e+06	1.15335	1		440	49.1537	6.21436
P48047	ATP synthase subunit O, mitochondrial OS=Homo sapiens GN=ATP5O PE=1 SV=1 - [ATPO_HUMAN]	5.07998	12.68	1	2	2	2	748388	1.05099	2	16.1804	213	23.2627	9.96436
P19105	Myosin regulatory light chain 12A OS=Homo sapiens GN=MYL12A PE=1 SV=2 - [ML12A_HUMAN]	5.05102	11.7	2	1	1	1	2.52499e+06	0.563124	1		171	19.7815	4.80518
Q8IUE6	Histone H2A type 2-B OS=Homo sapiens GN=HIST2H2AB PE=1 SV=3 - [H2A2B_HUMAN]	5.01916	12.31	1	1	2	2	6.08506e+06				130	13.9868	10.8872
O76031	ATP-dependent Clp protease ATP-binding subunit clpX-like, mitochondrial OS=Homo sapiens GN=CLPX PE=1 SV=2 - [CLPX_HUMAN]	5.01695	3.95	1	2	2	2	167619	0.85571	1		633	69.1807	7.57666
P24539	ATP synthase F(0) complex subunit B1, mitochondrial OS=Homo sapiens GN=ATP5F1 PE=1 SV=2 - [AT5F1_HUMAN]	4.98845	11.72	1	2	2	3	875632	1.44563	2	37.7727	256	28.8903	9.36377
Q16836	Hydroxyacyl-coenzyme A dehydrogenase, mitochondrial OS=Homo sapiens GN=HADH PE=1 SV=3 - [HCDH_HUMAN]	4.89788	7.01	1	1	1	3	211487	1.42982	2	17.4505	314	34.2719	8.85107
P24534	Elongation factor 1-beta OS=Homo sapiens GN=EEF1B2 PE=1 SV=3 - [EF1B_HUMAN]	4.75084	5.78	1	1	1	1	2.46621e+06	1.49635	1		225	24.7483	4.66553
Q8NFF5	FAD synthase OS=Homo sapiens GN=FLAD1 PE=1 SV=1 - [FAD1_HUMAN]	4.74915	3.58	1	1	1	3	291193	1.09747	1		587	65.2243	6.93213
Q99747	Gamma-soluble NSF attachment protein OS=Homo sapiens GN=NAPG PE=1 SV=1 - [SNAG_HUMAN]	4.65068	5.45	1	1	1	1	77709				312	34.7243	5.41455
Q4KMQ1	Taperin OS=Homo sapiens GN=TPRN PE=1 SV=2 - [TPRN_HUMAN]	4.52393	2.53	1	1	1	1	482675	0.615967	1		711	75.5097	7.25439
Q8WUY1	Protein THEM6 OS=Homo sapiens GN=THEM6 PE=1 SV=2 - [THEM6_HUMAN]	4.50499	5.77	1	1	1	1	1.75425e+06	0.98606	1		208	23.8499	9.5542
P36897	TGF-beta receptor type-1 OS=Homo sapiens GN=TGFBR1 PE=1 SV=1 - [TGFR1_HUMAN]	4.39466	2.98	1	1	1	1	1.99444e+06	1.27153	1		503	55.9234	7.54736
P54920	Alpha-soluble NSF attachment protein OS=Homo sapiens GN=NAPA PE=1 SV=3 - [SNAA_HUMAN]	4.35945	3.73	2	1	1	1	570047	1.0073	1		295	33.2113	5.36377
P04083	Annexin A1 OS=Homo sapiens GN=ANXA1 PE=1 SV=2 - [ANXA1_HUMAN]	4.35566	4.62	1	1	1	2	102529				346	38.69	7.02002
P11413	Glucose-6-phosphate 1-dehydrogenase OS=Homo sapiens GN=G6PD PE=1 SV=4 - [G6PD_HUMAN]	4.33457	3.11	1	1	1	1	533146	1.08856	1		515	59.219	6.84424
Q02218	2-oxoglutarate dehydrogenase, mitochondrial OS=Homo sapiens GN=OGDH PE=1 SV=3 - [ODO1_HUMAN]	4.28921	1.37	1	1	1	2	940769	1.05162	1		1023	115.861	6.85889
P13010	X-ray repair cross-complementing protein 5 OS=Homo sapiens GN=XRCC5 PE=1 SV=3 - [XRCC5_HUMAN]	4.25624	3.42	1	2	2	2	368765	0.960097	1		732	82.6523	5.80811
P30101	Protein disulfide-isomerase A3 OS=Homo sapiens GN=PDIA3 PE=1 SV=4 - [PDIA3_HUMAN]	4.20757	7.33	1	2	2	2	704709	1.02506	2	10.8939	505	56.7468	6.354
Q9HB71	Calcyclin-binding protein OS=Homo sapiens GN=CACYBP PE=1 SV=2 - [CYBP_HUMAN]	4.20083	10.53	1	1	1	1	972072	1.18066	1		228	26.1936	8.25049
P62942	Peptidyl-prolyl cis-trans isomerase FKBP1A OS=Homo sapiens GN=FKBP1A PE=1 SV=2 - [FKB1A_HUMAN]	4.14909	12.96	1	1	1	1	521901	0.871952	1		108	11.9431	8.1626
P50914	60S ribosomal protein L14 OS=Homo sapiens GN=RPL14 PE=1 SV=4 - [RL14_HUMAN]	4.07819	5.58	1	1	1	1	3.35966e+06	1.00934	1		215	23.417	10.9312
Q9Y289	Sodium-dependent multivitamin transporter OS=Homo sapiens GN=SLC5A6 PE=2 SV=2 - [SC5A6_HUMAN]	4.06133	2.68	1	1	1	1	852460				635	68.5964	8.26514
Q14847	LIM and SH3 domain protein 1 OS=Homo sapiens GN=LASP1 PE=1 SV=2 - [LASP1_HUMAN]	4.05531	4.98	1	1	1	1	1.23686e+06				261	29.6982	7.04932
Q9UM54	Unconventional myosin-VI OS=Homo sapiens GN=MYO6 PE=1 SV=4 - [MYO6_HUMAN]	4.03116	1.16	1	1	1	1	261728	0.66895	1		1294	149.596	8.52881
P07954	Fumarate hydratase, mitochondrial OS=Homo sapiens GN=FH PE=1 SV=3 - [FUMH_HUMAN]	4.00536	2.75	1	1	1	1	226764				510	54.6022	8.76318
Q9Y2Q3	Glutathione S-transferase kappa 1 OS=Homo sapiens GN=GSTK1 PE=1 SV=3 - [GSTK1_HUMAN]	4.00462	6.19	1	1	1	1	1.03616e+06	1.14608	1		226	25.4803	8.41162
P09467	Fructose-1,6-bisphosphatase 1 OS=Homo sapiens GN=FBP1 PE=1 SV=5 - [F16P1_HUMAN]	3.99953	4.73	1	1	1	1	690277	0.800819	1		338	36.8188	6.99072
P84095	Rho-related GTP-binding protein RhoG OS=Homo sapiens GN=RHOG PE=1 SV=1 - [RHOG_HUMAN]	3.9761	9.95	1	1	1	1	1.27036e+06	1.32962	1		191	21.2949	8.11865
Q9Y6I8	Peroxisomal membrane protein 4 OS=Homo sapiens GN=PXMP4 PE=1 SV=3 - [PXMP4_HUMAN]	3.95821	7.55	1	2	2	2	816371	0.727315	1		212	24.2489	10.0669
Q9UBF2	Coatomer subunit gamma-2 OS=Homo sapiens GN=COPG2 PE=1 SV=1 - [COPG2_HUMAN]	3.93282	1.38	2	1	1	1	509323				871	97.5596	5.80811
Q96FW1	Ubiquitin thioesterase OTUB1 OS=Homo sapiens GN=OTUB1 PE=1 SV=2 - [OTUB1_HUMAN]	3.93155	5.54	1	1	1	1	398494	0.816456	1		271	31.2644	4.94482
Q8N6M0	OTU domain-containing protein 6B OS=Homo sapiens GN=OTUD6B PE=1 SV=1 - [OTU6B_HUMAN]	3.92032	4.44	1	1	1	1	648494	1.4266	1		293	33.7915	6.04932
O15511	Actin-related protein 2/3 complex subunit 5 OS=Homo sapiens GN=ARPC5 PE=1 SV=3 - [ARPC5_HUMAN]	3.91992	7.95	1	1	1	1	1.67897e+06	0.928003	1		151	16.3103	5.66846
Q9H444	Charged multivesicular body protein 4b OS=Homo sapiens GN=CHMP4B PE=1 SV=1 - [CHM4B_HUMAN]	3.85435	6.25	1	1	1	1	547315	1.44363	1		224	24.9346	4.81787
Q53SF7	Cordon-bleu protein-like 1 OS=Homo sapiens GN=COBLL1 PE=1 SV=2 - [COBL1_HUMAN]	3.84936	1.16	1	1	1	1	312280				1204	131.705	6.66846
P0DMP2	SLIT-ROBO Rho GTPase-activating protein 2B OS=Homo sapiens GN=SRGAP2B PE=3 SV=1 - [SRG2B_HUMAN]	3.84711	2.62	4	1	1	1	185586				458	53.3718	6.85889
P09651	Heterogeneous nuclear ribonucleoprotein A1 OS=Homo sapiens GN=HNRNPA1 PE=1 SV=5 - [ROA1_HUMAN]	3.84254	4.84	1	1	1	1	140993	1.31354	1		372	38.7231	9.12939
Q9BW04	Specifically androgen-regulated gene protein OS=Homo sapiens GN=SARG PE=1 SV=2 - [SARG_HUMAN]	3.84209	4.66	1	1	1	2	257056				601	63.9254	8.6167
Q6P4Q7	Metal transporter CNNM4 OS=Homo sapiens GN=CNNM4 PE=1 SV=3 - [CNNM4_HUMAN]	3.83604	5.29	1	2	2	3	76393.4	0.808469	1		775	86.5519	6.07471
O95470	Sphingosine-1-phosphate lyase 1 OS=Homo sapiens GN=SGPL1 PE=1 SV=3 - [SGPL1_HUMAN]	3.83228	2.64	1	1	1	1	991005	0.855016	1		568	63.4827	9.15869
Q15678	Tyrosine-protein phosphatase non-receptor type 14 OS=Homo sapiens GN=PTPN14 PE=1 SV=2 - [PTN14_HUMAN]	3.83008	2.11	1	1	1	1	581627	0.751231	1		1187	135.175	8.30908
O75396	Vesicle-trafficking protein SEC22b OS=Homo sapiens GN=SEC22B PE=1 SV=4 - [SC22B_HUMAN]	3.82393	6.51	1	1	1	1	241827	0.890134	1		215	24.5775	6.91748
Q13428	Treacle protein OS=Homo sapiens GN=TCOF1 PE=1 SV=3 - [TCOF_HUMAN]	3.823	0.94	1	1	1	1	708350	0.605604	1		1488	152.015	9.0415
P02747	Complement C1q subcomponent subunit C OS=Homo sapiens GN=C1QC PE=1 SV=3 - [C1QC_HUMAN]	3.81177	7.35	1	1	1	1	3.06648e+06				245	25.7571	8.41162
Q15388	Mitochondrial import receptor subunit TOM20 homolog OS=Homo sapiens GN=TOMM20 PE=1 SV=1 - [TOM20_HUMAN]	3.79773	8.97	1	1	1	1	3.35865e+06				145	16.2877	8.60205
Q96FZ7	Charged multivesicular body protein 6 OS=Homo sapiens GN=CHMP6 PE=1 SV=3 - [CHMP6_HUMAN]	3.78526	6.47	1	1	1	1	366784	1.27956	1		201	23.4703	5.31299
P48739	Phosphatidylinositol transfer protein beta isoform OS=Homo sapiens GN=PITPNB PE=1 SV=2 - [PIPNB_HUMAN]	3.77948	4.43	1	1	1	1	541920	1.36307	1		271	31.5199	6.87354
P08237	ATP-dependent 6-phosphofructokinase, muscle type OS=Homo sapiens GN=PFKM PE=1 SV=2 - [PFKAM_HUMAN]	3.77375	1.54	1	1	1	1	275949	0.98871	1		780	85.1284	7.98682
O75964	ATP synthase subunit g, mitochondrial OS=Homo sapiens GN=ATP5L PE=1 SV=3 - [ATP5L_HUMAN]	3.77321	14.56	1	1	1	1	2.34593e+06	1.35094	1		103	11.4212	9.64209
Q12934	Filensin OS=Homo sapiens GN=BFSP1 PE=1 SV=3 - [BFSP1_HUMAN]	3.76102	5.11	1	1	1	1					665	74.4992	5.13525
Q969P0	Immunoglobulin superfamily member 8 OS=Homo sapiens GN=IGSF8 PE=1 SV=1 - [IGSF8_HUMAN]	3.7592	2.28	1	1	1	1	207909				613	64.9935	8.00146
O43776	Asparagine--tRNA ligase, cytoplasmic OS=Homo sapiens GN=NARS PE=1 SV=1 - [SYNC_HUMAN]	3.75601	3.47	1	1	1	1	2.40557e+06	1.04363	1		548	62.9025	6.25244
P60981	Destrin OS=Homo sapiens GN=DSTN PE=1 SV=3 - [DEST_HUMAN]	3.75439	6.67	1	1	1	1	5.14847e+06	1.4263	1		165	18.4935	7.85498
O75947	ATP synthase subunit d, mitochondrial OS=Homo sapiens GN=ATP5H PE=1 SV=3 - [ATP5H_HUMAN]	3.75232	10.56	1	1	1	1	1.30102e+06	1.23073	1		161	18.4795	5.30029
O75436	Vacuolar protein sorting-associated protein 26A OS=Homo sapiens GN=VPS26A PE=1 SV=2 - [VP26A_HUMAN]	3.74395	4.59	1	1	1	1	2.38554e+06				327	38.1457	6.56592
P43897	Elongation factor Ts, mitochondrial OS=Homo sapiens GN=TSFM PE=1 SV=2 - [EFTS_HUMAN]	3.74043	8.31	1	1	1	1	1.26954e+06	1.0733	1		325	35.3682	8.38232
Q07960	Rho GTPase-activating protein 1 OS=Homo sapiens GN=ARHGAP1 PE=1 SV=1 - [RHG01_HUMAN]	3.73683	4.1	1	1	1	1	1.37939e+06				439	50.4042	6.29053
Q8TCU6	Phosphatidylinositol 3,4,5-trisphosphate-dependent Rac exchanger 1 protein OS=Homo sapiens GN=PREX1 PE=1 SV=3 - [PREX1_HUMAN]	3.68422	0.78	1	1	1	1	275571	0.811668	1		1659	186.085	6.44287
O60884	DnaJ homolog subfamily A member 2 OS=Homo sapiens GN=DNAJA2 PE=1 SV=1 - [DNJA2_HUMAN]	3.53001	7.77	1	1	1	1	1.35085e+06				412	45.7166	6.48096
O95396	Adenylyltransferase and sulfurtransferase MOCS3 OS=Homo sapiens GN=MOCS3 PE=1 SV=1 - [MOCS3_HUMAN]	3.51156	3.26	1	1	1	1	227829				460	49.6379	6.21436
Q92552	28S ribosomal protein S27, mitochondrial OS=Homo sapiens GN=MRPS27 PE=1 SV=3 - [RT27_HUMAN]	3.49984	5.8	1	1	1	1	217037				414	47.5814	6.17627
Q9Y6D5	Brefeldin A-inhibited guanine nucleotide-exchange protein 2 OS=Homo sapiens GN=ARFGEF2 PE=1 SV=3 - [BIG2_HUMAN]	3.48627	1.74	1	2	2	2	303252	1.06381	2	7.00407	1785	201.909	6.32861
P63220	40S ribosomal protein S21 OS=Homo sapiens GN=RPS21 PE=1 SV=1 - [RS21_HUMAN]	3.48159	12.05	1	1	1	1	1.83943e+06	1.05798	1		83	9.10557	8.49951
O14983	Sarcoplasmic/endoplasmic reticulum calcium ATPase 1 OS=Homo sapiens GN=ATP2A1 PE=1 SV=1 - [AT2A1_HUMAN]	3.47826	1.3	2	1	1	1	611761	1.15756	1		1001	110.182	5.16064
Q9Y3D3	28S ribosomal protein S16, mitochondrial OS=Homo sapiens GN=MRPS16 PE=1 SV=1 - [RT16_HUMAN]	3.46156	13.14	1	1	1	1	282914				137	15.335	9.49561
Q9Y230	RuvB-like 2 OS=Homo sapiens GN=RUVBL2 PE=1 SV=3 - [RUVB2_HUMAN]	3.44801	2.59	1	1	1	1	1.28454e+06	1.01429	1		463	51.1246	5.64307
O94832	Unconventional myosin-Id OS=Homo sapiens GN=MYO1D PE=1 SV=2 - [MYO1D_HUMAN]	3.44681	1.19	1	1	1	1	196202				1006	116.129	9.39307
Q99615	DnaJ homolog subfamily C member 7 OS=Homo sapiens GN=DNAJC7 PE=1 SV=2 - [DNJC7_HUMAN]	3.44584	2.43	1	1	1	1	470276	1.25224	1		494	56.4047	6.96143
Q5TH69	Brefeldin A-inhibited guanine nucleotide-exchange protein 3 OS=Homo sapiens GN=ARFGEF3 PE=1 SV=3 - [BIG3_HUMAN]	3.42944	0.69	1	1	1	1	393621	0.802552	1		2177	240.498	5.8208
P56192	Methionine--tRNA ligase, cytoplasmic OS=Homo sapiens GN=MARS PE=1 SV=2 - [SYMC_HUMAN]	3.42807	4.22	1	2	2	2	291710	0.902737	2	1.48526	900	101.052	6.16357
P82650	28S ribosomal protein S22, mitochondrial OS=Homo sapiens GN=MRPS22 PE=1 SV=1 - [RT22_HUMAN]	3.41524	10.83	1	2	2	2	649306	1.06885	1		360	41.2544	7.89893
Q5T4S7	E3 ubiquitin-protein ligase UBR4 OS=Homo sapiens GN=UBR4 PE=1 SV=1 - [UBR4_HUMAN]	3.3825	0.54	1	1	1	1	278990				5183	573.476	6.03662
Q9NSE4	Isoleucine--tRNA ligase, mitochondrial OS=Homo sapiens GN=IARS2 PE=1 SV=2 - [SYIM_HUMAN]	3.37467	1.09	1	1	1	1	430035	1.49747	1		1012	113.719	7.1958
Q4VCS5	Angiomotin OS=Homo sapiens GN=AMOT PE=1 SV=1 - [AMOT_HUMAN]	3.37459	2.03	1	1	1	1	3.29851e+06				1084	118.013	7.63525
Q92616	Translational activator GCN1 OS=Homo sapiens GN=GCN1L1 PE=1 SV=6 - [GCN1L_HUMAN]	3.36015	0.9	1	1	1	1	375047	0.486298	1		2671	292.572	7.47412
P62306	Small nuclear ribonucleoprotein F OS=Homo sapiens GN=SNRPF PE=1 SV=1 - [RUXF_HUMAN]	3.35392	15.12	1	1	1	1	246167				86	9.71878	4.66553
Q9NZB2	Constitutive coactivator of PPAR-gamma-like protein 1 OS=Homo sapiens GN=FAM120A PE=1 SV=2 - [F120A_HUMAN]	3.31549	1.52	1	1	1	1	170095				1118	121.811	8.88037
P22735	Protein-glutamine gamma-glutamyltransferase K OS=Homo sapiens GN=TGM1 PE=1 SV=4 - [TGM1_HUMAN]	3.3105	1.47	1	1	1	1	626078	1.39257	1		817	89.7303	6.03662
O95837	Guanine nucleotide-binding protein subunit alpha-14 OS=Homo sapiens GN=GNA14 PE=1 SV=1 - [GNA14_HUMAN]	3.30925	3.1	3	1	1	1	2.55164e+06	0.897475	1		355	41.5442	6.07471
P07195	L-lactate dehydrogenase B chain OS=Homo sapiens GN=LDHB PE=1 SV=2 - [LDHB_HUMAN]	3.29429	4.79	1	1	1	1	608190	0.980324	1		334	36.6151	6.04932
P63218	Guanine nucleotide-binding protein G(I)/G(S)/G(O) subunit gamma-5 OS=Homo sapiens GN=GNG5 PE=1 SV=3 - [GBG5_HUMAN]	3.2672	13.24	1	1	1	1	1.07639e+06	0.953348	1		68	7.31381	9.84717
P61803	Dolichyl-diphosphooligosaccharide--protein glycosyltransferase subunit DAD1 OS=Homo sapiens GN=DAD1 PE=1 SV=3 - [DAD1_HUMAN]	3.26254	8.85	1	1	1	1	923408				113	12.4886	7.07861
Q9NRX4	14 kDa phosphohistidine phosphatase OS=Homo sapiens GN=PHPT1 PE=1 SV=1 - [PHP14_HUMAN]	3.26233	14.4	1	1	1	1					125	13.8237	6.07471
O95793	Double-stranded RNA-binding protein Staufen homolog 1 OS=Homo sapiens GN=STAU1 PE=1 SV=2 - [STAU1_HUMAN]	3.26148	2.25	1	1	1	1	113789	1.12903	1		577	63.1428	9.43701
Q96KP4	Cytosolic non-specific dipeptidase OS=Homo sapiens GN=CNDP2 PE=1 SV=2 - [CNDP2_HUMAN]	3.25936	3.79	1	1	1	1	1.60364e+06				475	52.8449	5.97314
P31146	Coronin-1A OS=Homo sapiens GN=CORO1A PE=1 SV=4 - [COR1A_HUMAN]	3.23082	2.17	1	1	1	1	487095				461	50.9938	6.68311
P16401	Histone H1.5 OS=Homo sapiens GN=HIST1H1B PE=1 SV=3 - [H15_HUMAN]	3.18593	5.31	1	1	1	1	820585	1.06327	1		226	22.5665	10.9165
O14579	Coatomer subunit epsilon OS=Homo sapiens GN=COPE PE=1 SV=3 - [COPE_HUMAN]	3.18396	8.44	1	1	1	1	129542	0.845207	1		308	34.4603	5.12256
Q14152	Eukaryotic translation initiation factor 3 subunit A OS=Homo sapiens GN=EIF3A PE=1 SV=1 - [EIF3A_HUMAN]	3.18142	1.01	1	1	1	1	479728	0.925075	1		1382	166.468	6.78564
O75912	Diacylglycerol kinase iota OS=Homo sapiens GN=DGKI PE=1 SV=1 - [DGKI_HUMAN]	3.16567	1.41	2	1	1	1					1065	116.923	7.76709
O15145	Actin-related protein 2/3 complex subunit 3 OS=Homo sapiens GN=ARPC3 PE=1 SV=3 - [ARPC3_HUMAN]	3.16068	6.18	1	1	1	1	1.19433e+06	1.11353	1		178	20.5334	8.5874
Q92609	TBC1 domain family member 5 OS=Homo sapiens GN=TBC1D5 PE=1 SV=1 - [TBCD5_HUMAN]	3.16004	1.89	1	1	1	1	411654				795	88.9486	6.53662
P50851	Lipopolysaccharide-responsive and beige-like anchor protein OS=Homo sapiens GN=LRBA PE=1 SV=4 - [LRBA_HUMAN]	3.14801	0.45	1	1	1	1	561896	1.36142	1		2863	318.906	5.60498
Q92890	Ubiquitin fusion degradation protein 1 homolog OS=Homo sapiens GN=UFD1L PE=1 SV=3 - [UFD1_HUMAN]	3.14394	3.91	1	1	1	1	333416	1.13835	1		307	34.4783	6.69775
P18827	Syndecan-1 OS=Homo sapiens GN=SDC1 PE=1 SV=3 - [SDC1_HUMAN]	3.13301	6.45	1	1	1	1	1.44407e+06	0.772828	1		310	32.4419	4.62744
P06730	Eukaryotic translation initiation factor 4E OS=Homo sapiens GN=EIF4E PE=1 SV=2 - [IF4E_HUMAN]	3.12598	6.45	1	1	1	1	353991	0.624864	1		217	25.0815	6.15088
Q14166	Tubulin--tyrosine ligase-like protein 12 OS=Homo sapiens GN=TTLL12 PE=1 SV=2 - [TTL12_HUMAN]	3.10987	2.33	1	1	1	1	765273	0.755324	1		644	74.356	5.52881
P24666	Low molecular weight phosphotyrosine protein phosphatase OS=Homo sapiens GN=ACP1 PE=1 SV=3 - [PPAC_HUMAN]	3.09963	5.7	1	1	1	1	1.33979e+06	0.818192	1		158	18.0308	6.7417
P82921	28S ribosomal protein S21, mitochondrial OS=Homo sapiens GN=MRPS21 PE=1 SV=2 - [RT21_HUMAN]	3.09124	16.09	1	1	1	1	206783	1.11864	1		87	10.7345	10.2134
Q5VW32	BRO1 domain-containing protein BROX OS=Homo sapiens GN=BROX PE=1 SV=1 - [BROX_HUMAN]	3.05476	2.68	1	1	1	1	988652	0.904689	1		411	46.4467	7.6499
O14602	Eukaryotic translation initiation factor 1A, Y-chromosomal OS=Homo sapiens GN=EIF1AY PE=1 SV=4 - [IF1AY_HUMAN]	3.04259	11.11	2	1	1	1	1.02989e+06	1.37517	1		144	16.4323	5.23682
Q9BPX5	Actin-related protein 2/3 complex subunit 5-like protein OS=Homo sapiens GN=ARPC5L PE=1 SV=1 - [ARP5L_HUMAN]	3.02045	7.84	1	1	1	1	375627				153	16.9308	6.59521
Q9UNE7	E3 ubiquitin-protein ligase CHIP OS=Homo sapiens GN=STUB1 PE=1 SV=2 - [CHIP_HUMAN]	3.00349	4.95	1	1	1	1	647032	0.438284	1		303	34.8342	5.87158
O95757	Heat shock 70 kDa protein 4L OS=Homo sapiens GN=HSPA4L PE=1 SV=3 - [HS74L_HUMAN]	3.00341	1.67	2	1	1	1	256559				839	94.4525	5.88428
Q9H9J2	39S ribosomal protein L44, mitochondrial OS=Homo sapiens GN=MRPL44 PE=1 SV=1 - [RM44_HUMAN]	2.98145	3.92	1	1	1	1	386495	0.766264	1		332	37.5117	8.39697
Q9Y6M7	Sodium bicarbonate cotransporter 3 OS=Homo sapiens GN=SLC4A7 PE=1 SV=2 - [S4A7_HUMAN]	2.9747	1.48	1	1	1	1	297300	0.766469	1		1214	135.957	6.7124
P29966	Myristoylated alanine-rich C-kinase substrate OS=Homo sapiens GN=MARCKS PE=1 SV=4 - [MARCS_HUMAN]	2.95999	5.42	1	1	1	1					332	31.5359	4.44971
P61221	ATP-binding cassette sub-family E member 1 OS=Homo sapiens GN=ABCE1 PE=1 SV=1 - [ABCE1_HUMAN]	2.94279	1.67	1	1	1	1	656709	1.33268	1		599	67.271	8.33838
Q5VWQ8	Disabled homolog 2-interacting protein OS=Homo sapiens GN=DAB2IP PE=1 SV=2 - [DAB2P_HUMAN]	2.93143	0.84	1	1	1	1	795697	1.17621	1		1189	131.543	8.71924
Q9UGV2	Protein NDRG3 OS=Homo sapiens GN=NDRG3 PE=1 SV=2 - [NDRG3_HUMAN]	2.92837	4	1	1	1	1	1.6224e+06	0.848403	1		375	41.3825	5.31299
Q9NRY4	Rho GTPase-activating protein 35 OS=Homo sapiens GN=ARHGAP35 PE=1 SV=3 - [RHG35_HUMAN]	2.90062	1.13	1	1	1	1	382558	0.746841	1		1499	170.407	6.63916
Q13425	Beta-2-syntrophin OS=Homo sapiens GN=SNTB2 PE=1 SV=1 - [SNTB2_HUMAN]	2.89727	1.67	1	1	1	1	563685				540	57.913	8.82178
P48444	Coatomer subunit delta OS=Homo sapiens GN=ARCN1 PE=1 SV=1 - [COPD_HUMAN]	2.89089	1.76	1	1	1	1	905135	0.73193	1		511	57.1741	6.21436
P28072	Proteasome subunit beta type-6 OS=Homo sapiens GN=PSMB6 PE=1 SV=4 - [PSB6_HUMAN]	2.88657	4.6	1	1	1	1	462862	0.625934	1		239	25.3414	4.91943
O75616	GTPase Era, mitochondrial OS=Homo sapiens GN=ERAL1 PE=1 SV=2 - [ERAL1_HUMAN]	2.87796	2.52	1	1	1	1	593625	0.847849	1		437	48.3195	8.83643
Q5VIR6	Vacuolar protein sorting-associated protein 53 homolog OS=Homo sapiens GN=VPS53 PE=1 SV=1 - [VPS53_HUMAN]	2.87496	3.43	1	1	1	1	479884	1.49143	1		699	79.602	6.02393
Q0VAA5	PI-PLC X domain-containing protein 2 OS=Homo sapiens GN=PLCXD2 PE=2 SV=1 - [PLCX2_HUMAN]	2.87478	2.62	1	1	1	1	1.81618e+06	0.911887	1		305	34.755	9.43701
O14936	Peripheral plasma membrane protein CASK OS=Homo sapiens GN=CASK PE=1 SV=3 - [CSKP_HUMAN]	2.86816	1.84	1	1	1	1	413525				926	105.056	6.43018
P35270	Sepiapterin reductase OS=Homo sapiens GN=SPR PE=1 SV=1 - [SPRE_HUMAN]	2.85737	7.28	1	1	1	1	260639				261	28.0308	8.04541
O75382	Tripartite motif-containing protein 3 OS=Homo sapiens GN=TRIM3 PE=1 SV=2 - [TRIM3_HUMAN]	2.84697	2.02	1	1	1	1	362883	1.16863	1		744	80.779	7.82568
O96000	NADH dehydrogenase [ubiquinone] 1 beta subcomplex subunit 10 OS=Homo sapiens GN=NDUFB10 PE=1 SV=3 - [NDUBA_HUMAN]	2.83249	8.14	1	1	1	1	222616				172	20.7632	8.48486
Q96BM9	ADP-ribosylation factor-like protein 8A OS=Homo sapiens GN=ARL8A PE=1 SV=1 - [ARL8A_HUMAN]	2.82925	4.84	2	1	1	1	665814	1.0404	1		186	21.402	7.76709
Q01130	Serine/arginine-rich splicing factor 2 OS=Homo sapiens GN=SRSF2 PE=1 SV=4 - [SRSF2_HUMAN]	2.8251	3.62	2	1	1	1	1.48212e+06	0.716144	1		221	25.4612	11.854
O76041	Nebulette OS=Homo sapiens GN=NEBL PE=1 SV=1 - [NEBL_HUMAN]	2.82285	1.58	1	1	1	1	237774	0.753959	1		1014	116.381	7.98682
Q7Z5D8	NANOG neighbor homeobox OS=Homo sapiens GN=NANOGNB PE=2 SV=1 - [NANGN_HUMAN]	2.79954	5.32	1	1	1	1	1.58103e+06				188	22.7355	9.71533
P49406	39S ribosomal protein L19, mitochondrial OS=Homo sapiens GN=MRPL19 PE=1 SV=2 - [RM19_HUMAN]	2.7903	3.08	1	1	1	1	586321				292	33.5136	9.49561
O43156	TELO2-interacting protein 1 homolog OS=Homo sapiens GN=TTI1 PE=1 SV=3 - [TTI1_HUMAN]	2.78685	1.74	1	1	1	1	178416	0.874878	1		1089	121.992	5.97314
Q96MC4	CEP295 N-terminal-like protein OS=Homo sapiens GN=CEP295NL PE=2 SV=1 - [C295L_HUMAN]	2.78668	1.61	1	1	1	1	442530				621	69.7954	9.59814
Q07955	Serine/arginine-rich splicing factor 1 OS=Homo sapiens GN=SRSF1 PE=1 SV=2 - [SRSF1_HUMAN]	2.78416	4.03	1	1	1	1	34141.1				248	27.7278	10.3599
P27708	CAD protein OS=Homo sapiens GN=CAD PE=1 SV=3 - [PYR1_HUMAN]	2.78126	1.17	1	1	1	1	298830				2225	242.829	6.45557
Q8TF74	WAS/WASL-interacting protein family member 2 OS=Homo sapiens GN=WIPF2 PE=1 SV=1 - [WIPF2_HUMAN]	2.78084	8.86	1	2	2	2	427860	0.913489	2	36.5638	440	46.2602	10.9312
P22234	Multifunctional protein ADE2 OS=Homo sapiens GN=PAICS PE=1 SV=3 - [PUR6_HUMAN]	2.77291	2.59	1	1	1	1	507881	1.12666	1		425	47.0491	7.2251
Q7L5D6	Golgi to ER traffic protein 4 homolog OS=Homo sapiens GN=GET4 PE=1 SV=1 - [GET4_HUMAN]	2.77223	3.67	1	1	1	1	677159	0.711054	1		327	36.481	5.41455
P61353	60S ribosomal protein L27 OS=Homo sapiens GN=RPL27 PE=1 SV=2 - [RL27_HUMAN]	2.76968	6.62	1	1	1	1	2.5903e+06	0.895129	1		136	15.7877	10.5649
P28482	Mitogen-activated protein kinase 1 OS=Homo sapiens GN=MAPK1 PE=1 SV=3 - [MK01_HUMAN]	2.75587	2.5	1	1	1	1	338951	1.49038	1		360	41.3632	6.97607
P62861	40S ribosomal protein S30 OS=Homo sapiens GN=FAU PE=1 SV=1 - [RS30_HUMAN]	2.75339	16.95	1	1	1	1	2.59421e+06	0.973681	1		59	6.64382	12.147
Q13596	Sorting nexin-1 OS=Homo sapiens GN=SNX1 PE=1 SV=3 - [SNX1_HUMAN]	2.73565	2.68	1	1	1	1	489763	1.81622	1		522	59.0331	5.14795
Q96IG2	F-box/LRR-repeat protein 20 OS=Homo sapiens GN=FBXL20 PE=1 SV=2 - [FXL20_HUMAN]	2.71814	1.83	1	1	1	1	1.65009e+06	0.887825	1		436	48.3915	7.48877
Q09161	Nuclear cap-binding protein subunit 1 OS=Homo sapiens GN=NCBP1 PE=1 SV=1 - [NCBP1_HUMAN]	2.71257	2.66	1	1	1	1	721179	0.640211	1		790	91.7805	6.43018
Q9BU76	Multiple myeloma tumor-associated protein 2 OS=Homo sapiens GN=MMTAG2 PE=1 SV=1 - [MMTA2_HUMAN]	2.70828	3.8	1	1	1	1	407113				263	29.3939	10.0229
P29597	Non-receptor tyrosine-protein kinase TYK2 OS=Homo sapiens GN=TYK2 PE=1 SV=3 - [TYK2_HUMAN]	2.70813	1.43	1	1	1	1					1187	133.565	7.15186
P42766	60S ribosomal protein L35 OS=Homo sapiens GN=RPL35 PE=1 SV=2 - [RL35_HUMAN]	2.70581	10.57	1	1	1	1	945206	1.00717	1		123	14.5426	11.0483
Q9BVC4	Target of rapamycin complex subunit LST8 OS=Homo sapiens GN=MLST8 PE=1 SV=1 - [LST8_HUMAN]	2.70274	5.52	1	1	1	1	759630	0.702963	1		326	35.8532	5.85889
O75439	Mitochondrial-processing peptidase subunit beta OS=Homo sapiens GN=PMPCB PE=1 SV=2 - [MPPB_HUMAN]	2.70176	2.04	1	1	1	1	166572	0.987871	1		489	54.3315	6.82959
P41091	Eukaryotic translation initiation factor 2 subunit 3 OS=Homo sapiens GN=EIF2S3 PE=1 SV=3 - [IF2G_HUMAN]	2.6993	2.97	1	1	1	1	947066	1.08964	1		472	51.0772	8.39697
Q9H788	SH2 domain-containing protein 4A OS=Homo sapiens GN=SH2D4A PE=1 SV=1 - [SH24A_HUMAN]	2.69762	2.42	1	1	1	1	108799	0.968435	1		454	52.6942	8.06006
Q9UBL3	Set1/Ash2 histone methyltransferase complex subunit ASH2 OS=Homo sapiens GN=ASH2L PE=1 SV=1 - [ASH2L_HUMAN]	2.69604	3.5	1	1	1	2	123219				628	68.6795	5.69385
P51178	1-phosphatidylinositol 4,5-bisphosphate phosphodiesterase delta-1 OS=Homo sapiens GN=PLCD1 PE=1 SV=2 - [PLCD1_HUMAN]	2.68894	2.91	1	1	1	1	1.13352e+06	0.858506	1		756	85.611	6.69775
Q9P265	Disco-interacting protein 2 homolog B OS=Homo sapiens GN=DIP2B PE=1 SV=3 - [DIP2B_HUMAN]	2.68735	1.14	1	1	1	1	412333	1.45114	1		1576	171.382	8.08936
Q9H0M0	NEDD4-like E3 ubiquitin-protein ligase WWP1 OS=Homo sapiens GN=WWP1 PE=1 SV=1 - [WWP1_HUMAN]	2.66417	1.84	1	1	1	1	179503				922	105.136	5.89697
O75390	Citrate synthase, mitochondrial OS=Homo sapiens GN=CS PE=1 SV=2 - [CISY_HUMAN]	2.6598	2.36	1	1	1	1	949954	1.44614	1		466	51.6795	8.32373
P51149	Ras-related protein Rab-7a OS=Homo sapiens GN=RAB7A PE=1 SV=1 - [RAB7A_HUMAN]	2.65837	4.83	1	1	1	1	1.05989e+06	1.1486	1		207	23.4748	6.69775
Q4G0F5	Vacuolar protein sorting-associated protein 26B OS=Homo sapiens GN=VPS26B PE=1 SV=2 - [VP26B_HUMAN]	2.65534	3.27	1	1	1	1	706089				336	39.1302	7.35693
P33527	Multidrug resistance-associated protein 1 OS=Homo sapiens GN=ABCC1 PE=1 SV=3 - [MRP1_HUMAN]	2.64336	0.59	1	1	1	1	238485				1531	171.481	7.10791
Q5VYK3	Proteasome-associated protein ECM29 homolog OS=Homo sapiens GN=ECM29 PE=1 SV=2 - [ECM29_HUMAN]	2.6416	0.65	1	1	1	1	127034	0.786833	1		1845	204.16	7.12256
Q15645	Pachytene checkpoint protein 2 homolog OS=Homo sapiens GN=TRIP13 PE=1 SV=2 - [PCH2_HUMAN]	2.6388	1.85	1	1	1	1	325169				432	48.5205	6.0874
Q96AG4	Leucine-rich repeat-containing protein 59 OS=Homo sapiens GN=LRRC59 PE=1 SV=1 - [LRC59_HUMAN]	2.63308	4.23	1	1	1	1	1.01662e+06	0.967764	1		307	34.9089	9.56885
Q99439	Calponin-2 OS=Homo sapiens GN=CNN2 PE=1 SV=4 - [CNN2_HUMAN]	2.63289	3.56	1	1	1	1	460981	0.743187	1		309	33.6753	7.32764
P25685	DnaJ homolog subfamily B member 1 OS=Homo sapiens GN=DNAJB1 PE=1 SV=4 - [DNJB1_HUMAN]	2.62416	2.65	1	1	1	1	1.35537e+06				340	38.0204	8.63135
Q13283	Ras GTPase-activating protein-binding protein 1 OS=Homo sapiens GN=G3BP1 PE=1 SV=1 - [G3BP1_HUMAN]	2.61133	2.36	1	1	1	1	761684	1.52432	1		466	52.1321	5.51611
Q9UQN3	Charged multivesicular body protein 2b OS=Homo sapiens GN=CHMP2B PE=1 SV=1 - [CHM2B_HUMAN]	2.6032	4.69	1	1	1	1	448257				213	23.8912	8.76318
Q9UBQ0	Vacuolar protein sorting-associated protein 29 OS=Homo sapiens GN=VPS29 PE=1 SV=1 - [VPS29_HUMAN]	2.56893	7.14	1	1	1	1	782509	0.993017	1		182	20.4927	6.78564
A2RRP1	Neuroblastoma-amplified sequence OS=Homo sapiens GN=NBAS PE=1 SV=2 - [NBAS_HUMAN]	2.56872	0.59	1	1	1	1	1.15071e+07				2371	268.401	5.96045
Q16625	Occludin OS=Homo sapiens GN=OCLN PE=1 SV=1 - [OCLN_HUMAN]	2.55991	1.92	1	1	1	1	557084	1.2155	1		522	59.1061	6.0874
Q14C86	GTPase-activating protein and VPS9 domain-containing protein 1 OS=Homo sapiens GN=GAPVD1 PE=1 SV=2 - [GAPD1_HUMAN]	2.51006	1.62	1	1	1	1					1478	164.877	5.22412
P37235	Hippocalcin-like protein 1 OS=Homo sapiens GN=HPCAL1 PE=1 SV=3 - [HPCL1_HUMAN]	2.50857	4.15	3	1	1	1	132715				193	22.299	5.35107
P06744	Glucose-6-phosphate isomerase OS=Homo sapiens GN=GPI PE=1 SV=4 - [G6PI_HUMAN]	2.4962	2.69	1	1	1	1	109193				558	63.1072	8.32373
P08243	Asparagine synthetase [glutamine-hydrolyzing] OS=Homo sapiens GN=ASNS PE=1 SV=4 - [ASNS_HUMAN]	2.49273	1.96	1	1	1	1	1.41571e+06	0.417898	1		561	64.3286	6.85889
Q6GQQ9	OTU domain-containing protein 7B OS=Homo sapiens GN=OTUD7B PE=1 SV=1 - [OTU7B_HUMAN]	2.485	1.9	1	1	1	1	115608	1.16524	1		843	92.468	6.7124
P13804	Electron transfer flavoprotein subunit alpha, mitochondrial OS=Homo sapiens GN=ETFA PE=1 SV=1 - [ETFA_HUMAN]	2.48454	5.41	1	1	1	1	231157	1.25987	1		333	35.0576	8.38232
Q9BST9	Rhotekin OS=Homo sapiens GN=RTKN PE=1 SV=2 - [RTKN_HUMAN]	2.47098	3.2	1	1	1	1	1.23302e+06	0.90063	1		563	62.6277	7.44482
Q9H2U2	Inorganic pyrophosphatase 2, mitochondrial OS=Homo sapiens GN=PPA2 PE=1 SV=2 - [IPYR2_HUMAN]	2.4629	2.4	1	1	1	1	468221	1.34014	1		334	37.896	7.38623
P06748	Nucleophosmin OS=Homo sapiens GN=NPM1 PE=1 SV=2 - [NPM_HUMAN]	2.4609	3.06	1	1	1	1	722541	0.830985	1		294	32.5548	4.77979
O14744	Protein arginine N-methyltransferase 5 OS=Homo sapiens GN=PRMT5 PE=1 SV=4 - [ANM5_HUMAN]	2.45956	1.41	1	1	1	1	487311	0.688182	1		637	72.6376	6.29053
Q9UBB4	Ataxin-10 OS=Homo sapiens GN=ATXN10 PE=1 SV=1 - [ATX10_HUMAN]	2.45147	3.16	1	1	1	1	228562				475	53.4548	5.24951
P46379	Large proline-rich protein BAG6 OS=Homo sapiens GN=BAG6 PE=1 SV=2 - [BAG6_HUMAN]	2.44905	1.5	1	1	1	1	167993	0.723862	1		1132	119.334	5.60498
Q13243	Serine/arginine-rich splicing factor 5 OS=Homo sapiens GN=SRSF5 PE=1 SV=1 - [SRSF5_HUMAN]	2.4192	3.31	3	1	1	1	1.45911e+06	0.661778	1		272	31.2453	11.5903
P58107	Epiplakin OS=Homo sapiens GN=EPPK1 PE=1 SV=2 - [EPIPL_HUMAN]	2.41376	1.96	1	1	1	1	126356	1.24229	1		5090	555.279	5.60498
O43615	Mitochondrial import inner membrane translocase subunit TIM44 OS=Homo sapiens GN=TIMM44 PE=1 SV=2 - [TIM44_HUMAN]	2.40103	3.1	1	1	1	1	468817				452	51.3235	8.32373
Q86X19	Transmembrane protein 17 OS=Homo sapiens GN=TMEM17 PE=2 SV=2 - [TMM17_HUMAN]	2.4006	4.04	1	1	1	1	2.22056e+06				198	23.0312	6.78564
Q9UBM7	7-dehydrocholesterol reductase OS=Homo sapiens GN=DHCR7 PE=1 SV=1 - [DHCR7_HUMAN]	2.39702	1.89	1	1	1	1	603076	0.79243	1		475	54.4538	8.70459
O75146	Huntingtin-interacting protein 1-related protein OS=Homo sapiens GN=HIP1R PE=1 SV=2 - [HIP1R_HUMAN]	2.39106	0.84	1	1	1	1	5.0934e+06	1.00058	1		1068	119.315	6.66846
P53680	AP-2 complex subunit sigma OS=Homo sapiens GN=AP2S1 PE=1 SV=2 - [AP2S1_HUMAN]	2.38262	4.93	1	1	1	1	667554	0.833299	1		142	17.0067	6.17627
Q13257	Mitotic spindle assembly checkpoint protein MAD2A OS=Homo sapiens GN=MAD2L1 PE=1 SV=1 - [MD2L1_HUMAN]	2.37015	3.41	1	1	1	1	1.00508e+06	0.880291	1		205	23.4952	5.08447
Q9UBX3	Mitochondrial dicarboxylate carrier OS=Homo sapiens GN=SLC25A10 PE=1 SV=2 - [DIC_HUMAN]	2.36742	8.36	1	1	1	1	592113	0.895528	1		287	31.2623	9.53955
Q99816	Tumor susceptibility gene 101 protein OS=Homo sapiens GN=TSG101 PE=1 SV=2 - [TS101_HUMAN]	2.3493	2.56	1	1	1	1	568406				390	43.9165	6.45557
Q96JG6	Syndetin OS=Homo sapiens GN=VPS50 PE=1 SV=3 - [VPS50_HUMAN]	2.32724	1.87	1	1	1	1	112348				964	111.104	6.20166
Q96RP9	Elongation factor G, mitochondrial OS=Homo sapiens GN=GFM1 PE=1 SV=2 - [EFGM_HUMAN]	2.30506	3.86	1	1	1	1	933278	1.13277	1		751	83.4184	7.00537
P11498	Pyruvate carboxylase, mitochondrial OS=Homo sapiens GN=PC PE=1 SV=2 - [PYC_HUMAN]	2.30139	1.02	1	1	1	1	377563	0.757766	1		1178	129.551	6.84424
Q2M3D2	Exocyst complex component 3-like protein 2 OS=Homo sapiens GN=EXOC3L2 PE=2 SV=1 - [EX3L2_HUMAN]	2.30082	4.4	1	1	1	1	4.86955e+06				409	45.8301	7.7085
Q9NVI7	ATPase family AAA domain-containing protein 3A OS=Homo sapiens GN=ATAD3A PE=1 SV=2 - [ATD3A_HUMAN]	2.29659	1.74	2	1	1	1	533417	1.60568	1		634	71.3247	8.98291
P30041	Peroxiredoxin-6 OS=Homo sapiens GN=PRDX6 PE=1 SV=3 - [PRDX6_HUMAN]	2.2915	4.91	1	1	1	1	1.21549e+06	1.2921	1		224	25.0192	6.37939
Q4KMP7	TBC1 domain family member 10B OS=Homo sapiens GN=TBC1D10B PE=1 SV=3 - [TB10B_HUMAN]	2.29054	0.87	1	1	1	1	712688	1.64604	1		808	87.1447	9.18799
Q13347	Eukaryotic translation initiation factor 3 subunit I OS=Homo sapiens GN=EIF3I PE=1 SV=1 - [EIF3I_HUMAN]	2.2838	3.38	1	1	1	1	528581	1.07055	1		325	36.4786	5.64307
O95372	Acyl-protein thioesterase 2 OS=Homo sapiens GN=LYPLA2 PE=1 SV=1 - [LYPA2_HUMAN]	2.27541	10.82	1	1	1	1	1.64425e+06	0.998884	1		231	24.7207	7.2251
Q9H3N1	Thioredoxin-related transmembrane protein 1 OS=Homo sapiens GN=TMX1 PE=1 SV=1 - [TMX1_HUMAN]	2.27044	3.57	1	1	1	1	563859	1.13857	1		280	31.7708	4.98291
Q96BP3	Peptidylprolyl isomerase domain and WD repeat-containing protein 1 OS=Homo sapiens GN=PPWD1 PE=1 SV=1 - [PPWD1_HUMAN]	2.26766	1.39	1	1	1	1	677257				646	73.5279	7.15186
P39656	Dolichyl-diphosphooligosaccharide--protein glycosyltransferase 48 kDa subunit OS=Homo sapiens GN=DDOST PE=1 SV=4 - [OST48_HUMAN]	2.25343	2.19	1	1	1	1	503558				456	50.769	6.55127
Q8TAT6	Nuclear protein localization protein 4 homolog OS=Homo sapiens GN=NPLOC4 PE=1 SV=3 - [NPL4_HUMAN]	2.24804	1.32	1	1	1	1	2.57444e+06				608	68.0769	6.37939
Q9Y3F4	Serine-threonine kinase receptor-associated protein OS=Homo sapiens GN=STRAP PE=1 SV=1 - [STRAP_HUMAN]	2.24333	4.57	1	1	1	1	1706030				350	38.414	5.12256
P46459	Vesicle-fusing ATPase OS=Homo sapiens GN=NSF PE=1 SV=3 - [NSF_HUMAN]	2.23793	1.34	1	1	1	1	274475				744	82.5421	6.94678
P12277	Creatine kinase B-type OS=Homo sapiens GN=CKB PE=1 SV=1 - [KCRB_HUMAN]	2.23393	4.46	1	1	1	1	72964.3	0.745057	1		381	42.6173	5.59229
Q96H78	Solute carrier family 25 member 44 OS=Homo sapiens GN=SLC25A44 PE=2 SV=1 - [S2544_HUMAN]	2.22867	2.87	1	1	1	1	873653	1.22111	1		314	35.3696	9.62744
Q96A33	Coiled-coil domain-containing protein 47 OS=Homo sapiens GN=CCDC47 PE=1 SV=1 - [CCD47_HUMAN]	2.22784	4.97	1	1	1	1	128492	0.868707	1		483	55.8383	4.86865
O60437	Periplakin OS=Homo sapiens GN=PPL PE=1 SV=4 - [PEPL_HUMAN]	2.21256	0.8	1	1	1	1	1.27825e+07	0.0346902	1		1756	204.623	5.60498
Q9P2X0	Dolichol-phosphate mannosyltransferase subunit 3 OS=Homo sapiens GN=DPM3 PE=1 SV=2 - [DPM3_HUMAN]	2.18891	10.87	1	1	1	1	189455				92	10.0872	5.93506
P23458	Tyrosine-protein kinase JAK1 OS=Homo sapiens GN=JAK1 PE=1 SV=2 - [JAK1_HUMAN]	2.1758	1.65	1	1	1	1	138510				1154	133.191	7.54736
P30085	UMP-CMP kinase OS=Homo sapiens GN=CMPK1 PE=1 SV=3 - [KCY_HUMAN]	2.16148	4.08	1	1	1	1	781042				196	22.2083	5.56689
Q99733	Nucleosome assembly protein 1-like 4 OS=Homo sapiens GN=NAP1L4 PE=1 SV=1 - [NP1L4_HUMAN]	2.15843	4.8	1	1	1	1	81123.6				375	42.7969	4.69092
Q9BYN8	28S ribosomal protein S26, mitochondrial OS=Homo sapiens GN=MRPS26 PE=1 SV=1 - [RT26_HUMAN]	2.15254	8.78	1	1	1	1	134328	0.835131	1		205	24.1969	10.3892
P61764	Syntaxin-binding protein 1 OS=Homo sapiens GN=STXBP1 PE=1 SV=1 - [STXB1_HUMAN]	2.12474	1.68	1	1	1	1	287300				594	67.5259	6.96143
Q8NFV4	Alpha/beta hydrolase domain-containing protein 11 OS=Homo sapiens GN=ABHD11 PE=1 SV=1 - [ABHDB_HUMAN]	2.11747	6.67	1	1	1	2	423879				315	34.6681	9.48096
P28066	Proteasome subunit alpha type-5 OS=Homo sapiens GN=PSMA5 PE=1 SV=3 - [PSA5_HUMAN]	2.1168	7.88	1	1	1	1	1.03815e+06	0.879945	1		241	26.3942	4.79248
Q8TER0	Sushi, nidogen and EGF-like domain-containing protein 1 OS=Homo sapiens GN=SNED1 PE=2 SV=2 - [SNED1_HUMAN]	2.11195	0.57	1	1	1	1	1.93901e+06				1413	152.104	6.97607
Q8N8S7	Protein enabled homolog OS=Homo sapiens GN=ENAH PE=1 SV=2 - [ENAH_HUMAN]	2.07692	3.72	1	1	1	1	65044.4	0.593132	1		591	66.4699	6.93213
Q9NZ53	Podocalyxin-like protein 2 OS=Homo sapiens GN=PODXL2 PE=1 SV=1 - [PDXL2_HUMAN]	2.04788	2.31	1	1	1	1	17885.1	0.386944	1		605	65.0356	4.33545
Q00341	Vigilin OS=Homo sapiens GN=HDLBP PE=1 SV=2 - [VIGLN_HUMAN]	2.03431	1.26	1	1	1	1	274471				1268	141.368	6.87354
P12956	X-ray repair cross-complementing protein 6 OS=Homo sapiens GN=XRCC6 PE=1 SV=2 - [XRCC6_HUMAN]	2.01468	3.61	1	1	1	1	208026	0.796712	1		609	69.7991	6.63916
Q8TE68	Epidermal growth factor receptor kinase substrate 8-like protein 1 OS=Homo sapiens GN=EPS8L1 PE=1 SV=3 - [ES8L1_HUMAN]	2.01414	2.35	1	1	1	1	378004				723	80.202	6.03662
Q12846	Syntaxin-4 OS=Homo sapiens GN=STX4 PE=1 SV=2 - [STX4_HUMAN]	2.00989	3.7	1	1	1	1	650215	1.68891	1		297	34.1589	6.27783
O60784	Target of Myb protein 1 OS=Homo sapiens GN=TOM1 PE=1 SV=2 - [TOM1_HUMAN]	1.9929	2.64	1	1	1	1	49048.3				492	53.7849	4.70361
Q6P1Q9	Methyltransferase-like protein 2B OS=Homo sapiens GN=METTL2B PE=1 SV=3 - [MET2B_HUMAN]	1.98784	3.44	1	1	1	1	136641				378	43.3983	5.85889
P11216	Glycogen phosphorylase, brain form OS=Homo sapiens GN=PYGB PE=1 SV=5 - [PYGB_HUMAN]	1.85744	2.97	1	1	1	1	283888				843	96.6345	6.85889
P28222	5-hydroxytryptamine receptor 1B OS=Homo sapiens GN=HTR1B PE=1 SV=1 - [5HT1B_HUMAN]	0	6.92	1	1	1	1					390	43.5398	8.68994
Q8IUX4	DNA dC->dU-editing enzyme APOBEC-3F OS=Homo sapiens GN=APOBEC3F PE=1 SV=3 - [ABC3F_HUMAN]	0	5.63	1	1	1	1	4.69896e+06				373	44.9906	7.2251
Q8N865	Uncharacterized protein C7orf31 OS=Homo sapiens GN=C7orf31 PE=1 SV=3 - [CG031_HUMAN]	0	6.44	1	1	1	1					590	68.4211	7.31299
Q9GZS0	Dynein intermediate chain 2, axonemal OS=Homo sapiens GN=DNAI2 PE=1 SV=2 - [DNAI2_HUMAN]	0	5.62	1	1	1	1					605	68.7775	4.7417
Q13011	Delta(3,5)-Delta(2,4)-dienoyl-CoA isomerase, mitochondrial OS=Homo sapiens GN=ECH1 PE=1 SV=2 - [ECH1_HUMAN]	0	6.71	1	1	1	2	56244.8				328	35.7934	8.00146
Q96MK2	Protein FAM65C OS=Homo sapiens GN=FAM65C PE=2 SV=4 - [FA65C_HUMAN]	0	1.27	1	1	1	1	4.10969e+06				946	105.224	7.43018
P23588	Eukaryotic translation initiation factor 4B OS=Homo sapiens GN=EIF4B PE=1 SV=2 - [IF4B_HUMAN]	0	4.09	1	1	1	1	45681.6	0.675097	1		611	69.1103	5.73193
P00568	Adenylate kinase isoenzyme 1 OS=Homo sapiens GN=AK1 PE=1 SV=3 - [KAD1_HUMAN]	0	7.22	1	1	1	1	333468	1.28793	1		194	21.6213	8.63135
Q5VZK9	Leucine-rich repeat-containing protein 16A OS=Homo sapiens GN=LRRC16A PE=1 SV=1 - [LR16A_HUMAN]	0	1.24	1	1	1	1	54861	0.783869	1		1371	151.462	7.85498
P20916	Myelin-associated glycoprotein OS=Homo sapiens GN=MAG PE=1 SV=1 - [MAG_HUMAN]	0	3.83	1	1	1	1					626	69.0247	5.03369
Q9Y316	Protein MEMO1 OS=Homo sapiens GN=MEMO1 PE=1 SV=1 - [MEMO1_HUMAN]	0	7.07	1	1	1	1	922748	0.727575	1		297	33.7115	7.13721
P30044	Peroxiredoxin-5, mitochondrial OS=Homo sapiens GN=PRDX5 PE=1 SV=4 - [PRDX5_HUMAN]	0	8.41	1	1	1	1	330261				214	22.0725	8.70459
P43686	26S protease regulatory subunit 6B OS=Homo sapiens GN=PSMC4 PE=1 SV=2 - [PRS6B_HUMAN]	0	4.31	1	1	1	2	130944	0.815702	1		418	47.3365	5.21143
P35268	60S ribosomal protein L22 OS=Homo sapiens GN=RPL22 PE=1 SV=2 - [RL22_HUMAN]	0	11.72	1	1	1	1	1.62403e+06				128	14.7778	9.18799
Q9NP92	28S ribosomal protein S30, mitochondrial OS=Homo sapiens GN=MRPS30 PE=1 SV=2 - [RT30_HUMAN]	0	4.56	1	1	1	2	204209	0.837697	1		439	50.3328	7.97217
Q99584	Protein S100-A13 OS=Homo sapiens GN=S100A13 PE=1 SV=1 - [S10AD_HUMAN]	0	12.24	1	1	1	1	1.14618e+06				98	11.4641	6.16357
Q9UPW6	DNA-binding protein SATB2 OS=Homo sapiens GN=SATB2 PE=1 SV=2 - [SATB2_HUMAN]	0	2.86	1	1	1	1					733	82.504	6.90283
Q658P3	Metalloreductase STEAP3 OS=Homo sapiens GN=STEAP3 PE=1 SV=2 - [STEA3_HUMAN]	0	3.48	1	1	1	1	1.35009e+06	1.06255	1		488	54.5658	8.60205
Q4FZB7	Histone-lysine N-methyltransferase SUV420H1 OS=Homo sapiens GN=SUV420H1 PE=1 SV=4 - [SV421_HUMAN]	0	2.49	1	1	1	1	2.1256e+06				885	99.1254	8.77783
Q8N1B4	Vacuolar protein sorting-associated protein 52 homolog OS=Homo sapiens GN=VPS52 PE=1 SV=1 - [VPS52_HUMAN]	0	2.63	1	1	1	1	29379.9				723	82.1696	5.98584
O15498	Synaptobrevin homolog YKT6 OS=Homo sapiens GN=YKT6 PE=1 SV=1 - [YKT6_HUMAN]	0	4.04	1	1	1	1	790832				198	22.4034	6.91748

## Sheet: IgG_IP_chromatin_629
Accession	Description	Score	Coverage	# Proteins	# Unique Peptides	# Peptides	# PSMs	Area	Heavy/Light	Heavy/Light Count	Heavy/Light Variability [%]	# AAs	MW [kDa]	calc. pI
P49327	Fatty acid synthase OS=Homo sapiens GN=FASN PE=1 SV=3 - [FAS_HUMAN]	298.703	19.39	2	38	38	106	3.13689e+07	0.92933	40	13.0893	2511	273.254	6.44287
P04264	Keratin, type II cytoskeletal 1 OS=Homo sapiens GN=KRT1 PE=1 SV=6 - [K2C1_HUMAN]	117.539	27.8	1	17	19	38	4.34478e+06	0.0156713	1		644	65.999	8.11865
P05787	Keratin, type II cytoskeletal 8 OS=Homo sapiens GN=KRT8 PE=1 SV=7 - [K2C8_HUMAN]	71.9636	20.7	1	10	10	24	813438	1.09661	11	9.56696	483	53.6711	5.59229
P38646	Stress-70 protein, mitochondrial OS=Homo sapiens GN=HSPA9 PE=1 SV=2 - [GRP75_HUMAN]	62.1095	18.11	1	9	9	22	771439	1.21423	8	5.25542	679	73.6348	6.16357
P35908	Keratin, type II cytoskeletal 2 epidermal OS=Homo sapiens GN=KRT2 PE=1 SV=2 - [K22E_HUMAN]	60.507	25.98	3	9	12	22	2.96244e+06				639	65.3932	8.00146
P08727	Keratin, type I cytoskeletal 19 OS=Homo sapiens GN=KRT19 PE=1 SV=4 - [K1C19_HUMAN]	58.69	28.5	5	7	10	20	578481	1.14414	8	3.98536	400	44.0791	5.13525
P08238	Heat shock protein HSP 90-beta OS=Homo sapiens GN=HSP90AB1 PE=1 SV=4 - [HS90B_HUMAN]	53.1188	20.99	6	4	11	20	662136	0.855967	4	12.5372	724	83.2121	5.03369
P13645	Keratin, type I cytoskeletal 10 OS=Homo sapiens GN=KRT10 PE=1 SV=6 - [K1C10_HUMAN]	50.3427	23.63	7	10	12	16	3.10208e+06				584	58.7917	5.21143
P36957	Dihydrolipoyllysine-residue succinyltransferase component of 2-oxoglutarate dehydrogenase complex, mitochondrial OS=Homo sapiens GN=DLST PE=1 SV=4 - [ODO2_HUMAN]	48.5272	10.6	1	4	4	15	864364	0.922929	5	10.9982	453	48.7245	8.95361
P02768	Serum albumin OS=Homo sapiens GN=ALB PE=1 SV=2 - [ALBU_HUMAN]	48.3546	3.61	1	3	3	14	4.81039e+07				609	69.3215	6.27783
Q9BQE3	Tubulin alpha-1C chain OS=Homo sapiens GN=TUBA1C PE=1 SV=1 - [TBA1C_HUMAN]	47.5875	27.17	7	8	8	16	1.049e+06	0.974577	8	6.08677	449	49.8635	5.09717
P35527	Keratin, type I cytoskeletal 9 OS=Homo sapiens GN=KRT9 PE=1 SV=3 - [K1C9_HUMAN]	43.8393	25.2	1	10	10	15	1.80423e+06				623	62.0268	5.23682
P07437	Tubulin beta chain OS=Homo sapiens GN=TUBB PE=1 SV=2 - [TBB5_HUMAN]	42.4412	15.77	7	2	6	15	571057	0.748252	2	53.5577	444	49.639	4.89404
P07900	Heat shock protein HSP 90-alpha OS=Homo sapiens GN=HSP90AA1 PE=1 SV=5 - [HS90A_HUMAN]	39.1849	13.66	5	1	7	15	662136	0.940633	1		732	84.6067	5.021
P09110	3-ketoacyl-CoA thiolase, peroxisomal OS=Homo sapiens GN=ACAA1 PE=1 SV=2 - [THIK_HUMAN]	38.1142	17.22	1	6	6	13	681483	1.53886	8	9.05377	424	44.2639	8.44092
P22061	Protein-L-isoaspartate(D-aspartate) O-methyltransferase OS=Homo sapiens GN=PCMT1 PE=1 SV=4 - [PIMT_HUMAN]	34.9275	25.55	1	5	5	14	1.24393e+06	0.969463	6	3.45713	227	24.6206	7.21045
P07477	Trypsin-1 OS=Homo sapiens GN=PRSS1 PE=1 SV=1 - [TRY1_HUMAN]	34.1418	4.05	1	1	1	13	6.35546e+06				247	26.5411	6.50732
O95831	Apoptosis-inducing factor 1, mitochondrial OS=Homo sapiens GN=AIFM1 PE=1 SV=1 - [AIFM1_HUMAN]	33.714	13.38	1	6	6	14	868710	1.00121	6	13.3979	613	66.8589	8.95361
Q9UQ35	Serine/arginine repetitive matrix protein 2 OS=Homo sapiens GN=SRRM2 PE=1 SV=2 - [SRRM2_HUMAN]	32.3978	3.78	1	8	8	13	548062	1.00032	8	5.45963	2752	299.438	12.0591
P10809	60 kDa heat shock protein, mitochondrial OS=Homo sapiens GN=HSPD1 PE=1 SV=2 - [CH60_HUMAN]	32.1385	15.88	1	7	7	11	431446	1.41571	5	16.8881	573	61.0164	5.87158
P60709	Actin, cytoplasmic 1 OS=Homo sapiens GN=ACTB PE=1 SV=1 - [ACTB_HUMAN]	31.7777	23.47	7	3	6	12	1.99169e+06	0.923593	3	24.0031	375	41.7097	5.47803
P11142	Heat shock cognate 71 kDa protein OS=Homo sapiens GN=HSPA8 PE=1 SV=1 - [HSP7C_HUMAN]	30.5333	12.38	3	4	6	11	643828	0.97739	4	2.21002	646	70.8542	5.51611
P68104	Elongation factor 1-alpha 1 OS=Homo sapiens GN=EEF1A1 PE=1 SV=1 - [EF1A1_HUMAN]	28.8863	12.55	3	5	5	12	940975	1.0153	5	3.15054	462	50.1091	9.01221
P68371	Tubulin beta-4B chain OS=Homo sapiens GN=TUBB4B PE=1 SV=1 - [TBB4B_HUMAN]	28.1057	13.03	6	1	5	10	518700				445	49.799	4.89404
P0DMV8	Heat shock 70 kDa protein 1A OS=Homo sapiens GN=HSPA1A PE=1 SV=1 - [HS71A_HUMAN]	27.7731	8.58	5	2	4	10	562956	1.11282	2	0.678175	641	70.009	5.65576
P62269	40S ribosomal protein S18 OS=Homo sapiens GN=RPS18 PE=1 SV=3 - [RS18_HUMAN]	25.7846	32.24	1	5	5	9	450533	1.06957	6	15.2723	152	17.7079	10.9897
P62249	40S ribosomal protein S16 OS=Homo sapiens GN=RPS16 PE=1 SV=2 - [RS16_HUMAN]	25.7493	27.4	1	5	5	10	562403	1.16127	5	24.1317	146	16.435	10.2134
P04406	Glyceraldehyde-3-phosphate dehydrogenase OS=Homo sapiens GN=GAPDH PE=1 SV=3 - [G3P_HUMAN]	25.735	11.04	1	3	3	9	689431	1.00907	3	11.6717	335	36.0304	8.45557
P23396	40S ribosomal protein S3 OS=Homo sapiens GN=RPS3 PE=1 SV=2 - [RS3_HUMAN]	25.5438	24.69	1	5	5	8	538093	0.999678	4	12.256	243	26.6714	9.65674
Q66PJ3	ADP-ribosylation factor-like protein 6-interacting protein 4 OS=Homo sapiens GN=ARL6IP4 PE=1 SV=2 - [AR6P4_HUMAN]	25.0655	11.88	1	3	3	7	1.13338e+06	0.801775	3	5.95426	421	44.8882	10.9312
P62805	Histone H4 OS=Homo sapiens GN=HIST1H4A PE=1 SV=2 - [H4_HUMAN]	24.9967	29.13	1	3	3	8	817471	0.843806	3	4.79141	103	11.3604	11.356
Q06830	Peroxiredoxin-1 OS=Homo sapiens GN=PRDX1 PE=1 SV=1 - [PRDX1_HUMAN]	24.834	20.1	3	4	4	10	436228	0.994822	5	1.26499	199	22.0963	8.1333
P49411	Elongation factor Tu, mitochondrial OS=Homo sapiens GN=TUFM PE=1 SV=2 - [EFTU_HUMAN]	24.7948	16.59	1	5	5	10	542126	1.07917	5	12.5618	452	49.5102	7.60596
P34896	Serine hydroxymethyltransferase, cytosolic OS=Homo sapiens GN=SHMT1 PE=1 SV=1 - [GLYC_HUMAN]	24.1458	14.29	1	4	5	9	565967	1.01104	5	5.782	483	53.049	7.7085
P04075	Fructose-bisphosphate aldolase A OS=Homo sapiens GN=ALDOA PE=1 SV=2 - [ALDOA_HUMAN]	23.3757	25.82	1	5	5	9	597051	1.16755	3	9.66831	364	39.3953	8.08936
Q12931	Heat shock protein 75 kDa, mitochondrial OS=Homo sapiens GN=TRAP1 PE=1 SV=3 - [TRAP1_HUMAN]	22.3414	5.97	1	2	3	6	410686	1.18586	2	29.4644	704	80.0597	8.20654
Q7KZF4	Staphylococcal nuclease domain-containing protein 1 OS=Homo sapiens GN=SND1 PE=1 SV=1 - [SND1_HUMAN]	21.9104	8.57	1	6	6	9	222301	1.12094	6	22.4697	910	101.934	7.1665
P08729	Keratin, type II cytoskeletal 7 OS=Homo sapiens GN=KRT7 PE=1 SV=5 - [K2C7_HUMAN]	20.4461	11.51	1	5	5	7	249701	1.1565	5	15.2106	469	51.3543	5.47803
P68032	Actin, alpha cardiac muscle 1 OS=Homo sapiens GN=ACTC1 PE=1 SV=1 - [ACTC_HUMAN]	20.2904	14.32	9	1	4	9	1.08439e+06	1.02318	2	4.24313	377	41.9919	5.38916
P02533	Keratin, type I cytoskeletal 14 OS=Homo sapiens GN=KRT14 PE=1 SV=4 - [K1C14_HUMAN]	19.9435	12.92	7	2	5	7	700878				472	51.5294	5.16064
Q13268	Dehydrogenase/reductase SDR family member 2, mitochondrial OS=Homo sapiens GN=DHRS2 PE=1 SV=4 - [DHRS2_HUMAN]	18.0059	12.86	1	3	3	8	831421	1.26125	4	13.7588	280	29.9077	9.01221
Q07020	60S ribosomal protein L18 OS=Homo sapiens GN=RPL18 PE=1 SV=2 - [RL18_HUMAN]	17.4559	13.83	1	2	2	5	450228	1.19184	2	4.41274	188	21.6211	11.7222
Q9Y383	Putative RNA-binding protein Luc7-like 2 OS=Homo sapiens GN=LUC7L2 PE=1 SV=2 - [LC7L2_HUMAN]	16.9819	10.46	1	3	3	6	306071	0.558411	3	7.94482	392	46.4856	10.0083
P35637	RNA-binding protein FUS OS=Homo sapiens GN=FUS PE=1 SV=1 - [FUS_HUMAN]	16.7714	6.27	2	4	4	6	659901	0.632709	4	13.4728	526	53.3938	9.36377
P62913	60S ribosomal protein L11 OS=Homo sapiens GN=RPL11 PE=1 SV=2 - [RL11_HUMAN]	16.168	12.92	1	2	2	5	400059	0.992738	2	10.6496	178	20.2396	9.59814
P11940	Polyadenylate-binding protein 1 OS=Homo sapiens GN=PABPC1 PE=1 SV=2 - [PABP1_HUMAN]	15.9342	5.82	3	3	3	6	118736	1.4642	3	9.78829	636	70.6259	9.49561
P62241	40S ribosomal protein S8 OS=Homo sapiens GN=RPS8 PE=1 SV=2 - [RS8_HUMAN]	15.7558	29.33	1	5	5	7	468172	1.15294	5	7.85933	208	24.1902	10.3159
P61978	Heterogeneous nuclear ribonucleoprotein K OS=Homo sapiens GN=HNRNPK PE=1 SV=1 - [HNRPK_HUMAN]	15.2624	15.98	1	5	5	6	227630	0.837254	5	17.772	463	50.9444	5.5415
P62424	60S ribosomal protein L7a OS=Homo sapiens GN=RPL7A PE=1 SV=2 - [RL7A_HUMAN]	14.8173	9.02	1	2	2	5	365171	1.10326	2	3.11537	266	29.977	10.6089
Q14103	Heterogeneous nuclear ribonucleoprotein D0 OS=Homo sapiens GN=HNRNPD PE=1 SV=1 - [HNRPD_HUMAN]	14.3898	3.94	1	1	1	5	231318	0.799702	1		355	38.4103	7.81104
P46783	40S ribosomal protein S10 OS=Homo sapiens GN=RPS10 PE=1 SV=1 - [RS10_HUMAN]	14.2831	13.94	2	2	2	6	208353	1.12456	2	9.29193	165	18.8859	10.1548
P26373	60S ribosomal protein L13 OS=Homo sapiens GN=RPL13 PE=1 SV=4 - [RL13_HUMAN]	13.9795	16.11	1	3	3	5	256440	1.16858	3	1.88622	211	24.2465	11.6489
Q562R1	Beta-actin-like protein 2 OS=Homo sapiens GN=ACTBL2 PE=1 SV=2 - [ACTBL_HUMAN]	13.5103	9.04	1	1	2	4	2.44777e+06				376	41.976	5.59229
Q14498	RNA-binding protein 39 OS=Homo sapiens GN=RBM39 PE=1 SV=2 - [RBM39_HUMAN]	13.4986	7.17	1	3	3	4	398618	0.51197	3	6.84406	530	59.3427	10.0962
P62851	40S ribosomal protein S25 OS=Homo sapiens GN=RPS25 PE=1 SV=1 - [RS25_HUMAN]	12.4397	15.2	1	2	2	5	467637	1.01121	2	1.36501	125	13.7337	10.1108
Q9NUD5	Zinc finger CCHC domain-containing protein 3 OS=Homo sapiens GN=ZCCHC3 PE=1 SV=1 - [ZCHC3_HUMAN]	12.2531	8.42	1	3	3	5	179178	0.844397	2	42.0389	404	43.5909	8.52881
P04792	Heat shock protein beta-1 OS=Homo sapiens GN=HSPB1 PE=1 SV=2 - [HSPB1_HUMAN]	12.1269	22.93	1	4	4	5	439839	0.988118	4	12.1457	205	22.7685	6.40479
P06733	Alpha-enolase OS=Homo sapiens GN=ENO1 PE=1 SV=2 - [ENOA_HUMAN]	12.0171	11.29	1	4	4	5	196641	1.13767	4	8.06464	434	47.1393	7.38623
P63244	Guanine nucleotide-binding protein subunit beta-2-like 1 OS=Homo sapiens GN=GNB2L1 PE=1 SV=3 - [GBLP_HUMAN]	11.9882	10.09	1	3	3	4	359867	1.00162	3	0.0911176	317	35.0546	7.69385
P50990	T-complex protein 1 subunit theta OS=Homo sapiens GN=CCT8 PE=1 SV=4 - [TCPQ_HUMAN]	11.8686	4.56	1	2	2	4	136430	0.917584	2	33.9768	548	59.5825	5.60498
Q15287	RNA-binding protein with serine-rich domain 1 OS=Homo sapiens GN=RNPS1 PE=1 SV=1 - [RNPS1_HUMAN]	11.8502	8.85	1	2	2	4	327090	0.563299	1		305	34.1877	11.8394
P36578	60S ribosomal protein L4 OS=Homo sapiens GN=RPL4 PE=1 SV=5 - [RL4_HUMAN]	11.8008	12.41	1	4	4	5	186773	1.26241	4	13.9042	427	47.6674	11.063
Q9NPA3	Mid1-interacting protein 1 OS=Homo sapiens GN=MID1IP1 PE=1 SV=1 - [M1IP1_HUMAN]	11.611	23.5	1	2	2	4	312999	0.54112	2	48.8004	183	20.1889	5.50342
Q13428	Treacle protein OS=Homo sapiens GN=TCOF1 PE=1 SV=3 - [TCOF_HUMAN]	11.0356	3.49	1	4	4	4	523491	0.487686	4	18.8182	1488	152.015	9.0415
P22626	Heterogeneous nuclear ribonucleoproteins A2/B1 OS=Homo sapiens GN=HNRNPA2B1 PE=1 SV=2 - [ROA2_HUMAN]	10.8726	7.08	1	2	2	4	280335	0.65755	2	20.6014	353	37.4067	8.95361
P12532	Creatine kinase U-type, mitochondrial OS=Homo sapiens GN=CKMT1A PE=1 SV=1 - [KCRU_HUMAN]	10.6169	5.04	1	1	1	4	271837	1.2009	1		417	47.0072	8.33838
P08865	40S ribosomal protein SA OS=Homo sapiens GN=RPSA PE=1 SV=4 - [RSSA_HUMAN]	10.2799	12.88	1	3	3	3	433706	1.07953	3	6.42084	295	32.8334	4.86865
P12268	Inosine-5'-monophosphate dehydrogenase 2 OS=Homo sapiens GN=IMPDH2 PE=1 SV=2 - [IMDH2_HUMAN]	10.0997	7.59	1	2	3	4	319640	0.962038	2	2.38477	514	55.7696	6.90283
P14618	Pyruvate kinase PKM OS=Homo sapiens GN=PKM PE=1 SV=4 - [KPYM_HUMAN]	9.97829	12.05	2	6	6	6	280585	1.06848	6	27.8156	531	57.9	7.84033
P18124	60S ribosomal protein L7 OS=Homo sapiens GN=RPL7 PE=1 SV=1 - [RL7_HUMAN]	9.94604	7.26	1	2	2	4	200589	1.3659	2	31.735	248	29.2072	10.6528
P39023	60S ribosomal protein L3 OS=Homo sapiens GN=RPL3 PE=1 SV=2 - [RL3_HUMAN]	9.91934	7.2	1	3	3	4	172366	1.24412	3	23.907	403	46.0798	10.1841
Q96KK5	Histone H2A type 1-H OS=Homo sapiens GN=HIST1H2AH PE=1 SV=3 - [H2A1H_HUMAN]	9.91036	14.84	10	1	1	4	433030	0.858736	2	13.744	128	13.8978	10.8872
P62263	40S ribosomal protein S14 OS=Homo sapiens GN=RPS14 PE=1 SV=3 - [RS14_HUMAN]	9.85231	22.52	1	2	2	4	184012	0.884356	2	20.8094	151	16.2625	10.0522
P61353	60S ribosomal protein L27 OS=Homo sapiens GN=RPL27 PE=1 SV=2 - [RL27_HUMAN]	9.64788	12.5	1	2	2	4	268193	1.03227	2	0.42089	136	15.7877	10.5649
P20839	Inosine-5'-monophosphate dehydrogenase 1 OS=Homo sapiens GN=IMPDH1 PE=1 SV=2 - [IMDH1_HUMAN]	9.46354	3.7	1	1	2	4	312254	1.49474	1		514	55.3705	6.90283
P01859	Ig gamma-2 chain C region OS=Homo sapiens GN=IGHG2 PE=1 SV=2 - [IGHG2_HUMAN]	9.3874	2.15	4	1	1	4	36959411				326	35.8778	7.59131
P10515	Dihydrolipoyllysine-residue acetyltransferase component of pyruvate dehydrogenase complex, mitochondrial OS=Homo sapiens GN=DLAT PE=1 SV=3 - [ODP2_HUMAN]	9.3747	2.63	1	2	2	4	346156	0.900221	2	6.59403	647	68.9531	7.84033
P62917	60S ribosomal protein L8 OS=Homo sapiens GN=RPL8 PE=1 SV=2 - [RL8_HUMAN]	9.30965	4.28	1	1	1	3	393397	1.11174	1		257	28.0073	11.0337
P62244	40S ribosomal protein S15a OS=Homo sapiens GN=RPS15A PE=1 SV=2 - [RS15A_HUMAN]	9.28813	23.85	1	3	3	4	275221	0.988513	2	10.0718	130	14.83	10.1255
P05783	Keratin, type I cytoskeletal 18 OS=Homo sapiens GN=KRT18 PE=1 SV=2 - [K1C18_HUMAN]	9.2674	15.12	1	3	4	4	158917	1.04881	2	23.6203	430	48.0285	5.45264
Q9NWB6	Arginine and glutamate-rich protein 1 OS=Homo sapiens GN=ARGLU1 PE=1 SV=1 - [ARGL1_HUMAN]	9.13905	8.42	1	3	3	4	447250	0.553968	3	16.5183	273	33.1968	10.3452
Q9HCC0	Methylcrotonoyl-CoA carboxylase beta chain, mitochondrial OS=Homo sapiens GN=MCCC2 PE=1 SV=1 - [MCCB_HUMAN]	9.09221	4.62	1	2	2	3	167724	0.9027	2	47.8199	563	61.2944	7.6792
Q01130	Serine/arginine-rich splicing factor 2 OS=Homo sapiens GN=SRSF2 PE=1 SV=4 - [SRSF2_HUMAN]	9.04708	3.62	2	1	1	4	523499	0.657103	1		221	25.4612	11.854
P11498	Pyruvate carboxylase, mitochondrial OS=Homo sapiens GN=PC PE=1 SV=2 - [PYC_HUMAN]	8.96699	5.18	1	5	5	5	102607	0.898422	5	37.2089	1178	129.551	6.84424
P21291	Cysteine and glycine-rich protein 1 OS=Homo sapiens GN=CSRP1 PE=1 SV=3 - [CSRP1_HUMAN]	8.84652	19.17	1	2	2	3	450147	1.06762	1		193	20.5538	8.57275
P31943	Heterogeneous nuclear ribonucleoprotein H OS=Homo sapiens GN=HNRNPH1 PE=1 SV=4 - [HNRH1_HUMAN]	8.76167	7.35	2	2	2	3	181836	0.520498	2	13.2984	449	49.1984	6.30322
P23528	Cofilin-1 OS=Homo sapiens GN=CFL1 PE=1 SV=3 - [COF1_HUMAN]	8.43075	15.06	2	2	2	3	228407	1.13564	2	28.4704	166	18.4907	8.08936
P50914	60S ribosomal protein L14 OS=Homo sapiens GN=RPL14 PE=1 SV=4 - [RL14_HUMAN]	8.38936	5.58	1	1	1	2	306260	1.1645	1		215	23.417	10.9312
P13647	Keratin, type II cytoskeletal 5 OS=Homo sapiens GN=KRT5 PE=1 SV=3 - [K2C5_HUMAN]	8.34106	5.59	3	2	3	3	359272				590	62.34	7.73779
P08559	Pyruvate dehydrogenase E1 component subunit alpha, somatic form, mitochondrial OS=Homo sapiens GN=PDHA1 PE=1 SV=3 - [ODPA_HUMAN]	8.20195	5.64	1	2	2	4	116751	0.7245	2	41.6051	390	43.2676	8.06006
Q16698	2,4-dienoyl-CoA reductase, mitochondrial OS=Homo sapiens GN=DECR1 PE=1 SV=1 - [DECR_HUMAN]	7.97982	6.87	1	2	2	3	168398	1.2115	2	2.08615	335	36.0448	9.27588
P84103	Serine/arginine-rich splicing factor 3 OS=Homo sapiens GN=SRSF3 PE=1 SV=1 - [SRSF3_HUMAN]	7.97196	24.39	2	3	3	3	453874	0.617128	2	10.1975	164	19.3179	11.6489
P16403	Histone H1.2 OS=Homo sapiens GN=HIST1H1C PE=1 SV=2 - [H12_HUMAN]	7.68584	15.02	5	3	3	3	221924	0.722771	3	5.51956	213	21.3517	10.9312
P13639	Elongation factor 2 OS=Homo sapiens GN=EEF2 PE=1 SV=4 - [EF2_HUMAN]	7.1327	4.55	1	3	3	3	142260	1.0361	2	19.1306	858	95.277	6.82959
P25705	ATP synthase subunit alpha, mitochondrial OS=Homo sapiens GN=ATP5A1 PE=1 SV=1 - [ATPA_HUMAN]	7.01183	4.52	1	2	2	3	80427.3	1.13649	2	38.4654	553	59.7136	9.12939
P61981	14-3-3 protein gamma OS=Homo sapiens GN=YWHAG PE=1 SV=2 - [1433G_HUMAN]	6.94038	9.72	6	1	2	3	120885	1.00924	1		247	28.2849	4.89404
P27348	14-3-3 protein theta OS=Homo sapiens GN=YWHAQ PE=1 SV=1 - [1433T_HUMAN]	6.87891	9.8	6	1	2	3	95499.4	1.26096	1		245	27.7468	4.77979
P40926	Malate dehydrogenase, mitochondrial OS=Homo sapiens GN=MDH2 PE=1 SV=3 - [MDHM_HUMAN]	6.69305	7.99	1	2	2	3	122875	2.48147	2	16	338	35.4807	8.67529
P09972	Fructose-bisphosphate aldolase C OS=Homo sapiens GN=ALDOC PE=1 SV=2 - [ALDOC_HUMAN]	6.3985	7.14	1	1	1	2	254254				364	39.4312	6.87354
P29692	Elongation factor 1-delta OS=Homo sapiens GN=EEF1D PE=1 SV=5 - [EF1D_HUMAN]	6.17799	12.81	1	2	2	2	250246	1.02267	2	2.10974	281	31.1028	5.0083
P47914	60S ribosomal protein L29 OS=Homo sapiens GN=RPL29 PE=1 SV=2 - [RL29_HUMAN]	5.9336	9.43	1	1	1	2	364539	0.974003	1		159	17.7411	11.6636
Q9BU76	Multiple myeloma tumor-associated protein 2 OS=Homo sapiens GN=MMTAG2 PE=1 SV=1 - [MMTA2_HUMAN]	5.87044	9.51	1	2	2	2	246049	0.54582	2	19.2704	263	29.3939	10.0229
P15880	40S ribosomal protein S2 OS=Homo sapiens GN=RPS2 PE=1 SV=2 - [RS2_HUMAN]	5.74075	11.6	1	3	3	3	451381	1.01924	3	9.3253	293	31.3046	10.2427
P61247	40S ribosomal protein S3a OS=Homo sapiens GN=RPS3A PE=1 SV=2 - [RS3A_HUMAN]	5.69181	6.06	1	2	2	3	160221	0.959467	2	1.45585	264	29.9257	9.72998
P34897	Serine hydroxymethyltransferase, mitochondrial OS=Homo sapiens GN=SHMT2 PE=1 SV=3 - [GLYM_HUMAN]	5.61724	4.96	1	1	2	2	213444				504	55.9577	8.52881
P61313	60S ribosomal protein L15 OS=Homo sapiens GN=RPL15 PE=1 SV=2 - [RL15_HUMAN]	5.55492	6.86	1	1	1	2	117960	1.06791	1		204	24.1311	11.6196
P60842	Eukaryotic initiation factor 4A-I OS=Homo sapiens GN=EIF4A1 PE=1 SV=1 - [IF4A1_HUMAN]	5.52039	5.91	2	2	2	2	163965	0.909209	2	23.9574	406	46.1246	5.47803
O76031	ATP-dependent Clp protease ATP-binding subunit clpX-like, mitochondrial OS=Homo sapiens GN=CLPX PE=1 SV=2 - [CLPX_HUMAN]	5.39945	3.79	1	2	2	2	87369.5	1.16595	2	27.8377	633	69.1807	7.57666
P02545	Prelamin-A/C OS=Homo sapiens GN=LMNA PE=1 SV=1 - [LMNA_HUMAN]	5.3982	3.46	1	2	2	2	97173.1	0.887398	1		664	74.0947	7.02002
Q15365	Poly(rC)-binding protein 1 OS=Homo sapiens GN=PCBP1 PE=1 SV=2 - [PCBP1_HUMAN]	5.18301	9.27	3	2	2	2	212465	0.902422	2	7.49509	356	37.4739	7.09326
P62937	Peptidyl-prolyl cis-trans isomerase A OS=Homo sapiens GN=PPIA PE=1 SV=2 - [PPIA_HUMAN]	5.12633	13.94	1	2	2	2	253654	1.16058	2	14.5663	165	18.0009	7.81104
P24752	Acetyl-CoA acetyltransferase, mitochondrial OS=Homo sapiens GN=ACAT1 PE=1 SV=1 - [THIL_HUMAN]	5.10738	4.92	1	2	2	2	139180	1.62806	2	39.2245	427	45.1706	8.85107
P00558	Phosphoglycerate kinase 1 OS=Homo sapiens GN=PGK1 PE=1 SV=3 - [PGK1_HUMAN]	5.10349	10.31	2	3	3	3	204252	1.32098	1		417	44.5861	8.104
P53999	Activated RNA polymerase II transcriptional coactivator p15 OS=Homo sapiens GN=SUB1 PE=1 SV=3 - [TCP4_HUMAN]	5.02747	18.9	1	2	2	2	249553	0.746965	2	22.682	127	14.3864	9.59814
O75131	Copine-3 OS=Homo sapiens GN=CPNE3 PE=1 SV=1 - [CPNE3_HUMAN]	5.00251	3.35	8	2	2	2	119856	1.25693	2	23.1726	537	60.0921	5.84619
P0CG48	Polyubiquitin-C OS=Homo sapiens GN=UBC PE=1 SV=3 - [UBC_HUMAN]	4.9307	21.02	4	1	1	2	186949	0.990478	1		685	76.9915	7.66455
P15311	Ezrin OS=Homo sapiens GN=EZR PE=1 SV=4 - [EZRI_HUMAN]	4.88978	4.61	4	2	2	2	213127	0.881883	2	42.4642	586	69.3697	6.26514
P52597	Heterogeneous nuclear ribonucleoprotein F OS=Homo sapiens GN=HNRNPF PE=1 SV=3 - [HNRPF_HUMAN]	4.78857	8.92	1	2	2	2	138832	0.647086	1		415	45.6429	5.57959
Q6NXT2	Histone H3.3C OS=Homo sapiens GN=H3F3C PE=1 SV=3 - [H3C_HUMAN]	4.70385	5.19	5	1	1	2	489315	0.947231	1		135	15.2044	11.1069
Q8WUM4	Programmed cell death 6-interacting protein OS=Homo sapiens GN=PDCD6IP PE=1 SV=1 - [PDC6I_HUMAN]	4.67604	1.5	1	1	1	2	93507.2	1.45177	1		868	95.9631	6.52197
P14625	Endoplasmin OS=Homo sapiens GN=HSP90B1 PE=1 SV=1 - [ENPL_HUMAN]	4.67069	3.86	1	1	2	2	164305	0.535119	1		803	92.4113	4.84326
Q15691	Microtubule-associated protein RP/EB family member 1 OS=Homo sapiens GN=MAPRE1 PE=1 SV=3 - [MARE1_HUMAN]	4.64229	7.46	1	1	1	2	215593	0.811233	1		268	29.9802	5.13525
P39019	40S ribosomal protein S19 OS=Homo sapiens GN=RPS19 PE=1 SV=2 - [RS19_HUMAN]	4.63531	13.1	1	2	2	2	135324	1.09012	2	6.79636	145	16.0505	10.3159
P62750	60S ribosomal protein L23a OS=Homo sapiens GN=RPL23A PE=1 SV=1 - [RL23A_HUMAN]	4.53216	8.33	1	1	1	2	534448	0.99699	1		156	17.6841	10.4478
O60814	Histone H2B type 1-K OS=Homo sapiens GN=HIST1H2BK PE=1 SV=3 - [H2B1K_HUMAN]	4.39462	7.14	9	1	1	2	653616	0.962853	1		126	13.8816	10.3159
P46781	40S ribosomal protein S9 OS=Homo sapiens GN=RPS9 PE=1 SV=3 - [RS9_HUMAN]	3.94723	8.25	1	2	2	2	282741	1.05364	2	4.40135	194	22.5776	10.6528
Q16678	Cytochrome P450 1B1 OS=Homo sapiens GN=CYP1B1 PE=1 SV=2 - [CP1B1_HUMAN]	3.94721	4.42	1	1	1	1	2.24974e+07				543	60.8073	8.98291
Q09666	Neuroblast differentiation-associated protein AHNAK OS=Homo sapiens GN=AHNAK PE=1 SV=2 - [AHNK_HUMAN]	3.94078	1.22	1	1	1	2	83977.8	1.35782	1		5890	628.699	6.15088
Q02218	2-oxoglutarate dehydrogenase, mitochondrial OS=Homo sapiens GN=OGDH PE=1 SV=3 - [ODO1_HUMAN]	3.89813	2.64	1	2	2	2	155470	0.918389	2	46.6427	1023	115.861	6.85889
P61513	60S ribosomal protein L37a OS=Homo sapiens GN=RPL37A PE=1 SV=2 - [RL37A_HUMAN]	3.89163	19.57	1	1	1	3	222061	1.02478	1		92	10.2685	10.4331
P26641	Elongation factor 1-gamma OS=Homo sapiens GN=EEF1G PE=1 SV=3 - [EF1G_HUMAN]	3.87033	2.97	1	1	1	1	201420	0.928641	1		437	50.0871	6.66846
Q9H009	Nascent polypeptide-associated complex subunit alpha-2 OS=Homo sapiens GN=NACA2 PE=1 SV=1 - [NACA2_HUMAN]	3.79614	6.98	1	1	1	3	95782.1	0.898686	1		215	23.2088	4.729
P25398	40S ribosomal protein S12 OS=Homo sapiens GN=RPS12 PE=1 SV=3 - [RS12_HUMAN]	3.7352	6.06	1	1	1	2	191841	0.887336	1		132	14.5055	7.21045
Q9P2D0	Inhibitor of Bruton tyrosine kinase OS=Homo sapiens GN=IBTK PE=1 SV=3 - [IBTK_HUMAN]	3.63817	0.67	1	1	1	2	399465				1353	150.432	7.7085
P17987	T-complex protein 1 subunit alpha OS=Homo sapiens GN=TCP1 PE=1 SV=1 - [TCPA_HUMAN]	3.62699	3.6	1	2	2	2	160531	0.900569	2	19.9539	556	60.3056	6.11279
P83731	60S ribosomal protein L24 OS=Homo sapiens GN=RPL24 PE=1 SV=1 - [RL24_HUMAN]	3.58635	8.28	1	1	1	1	185505				157	17.7679	11.2534
Q9UHR4	Brain-specific angiogenesis inhibitor 1-associated protein 2-like protein 1 OS=Homo sapiens GN=BAIAP2L1 PE=1 SV=2 - [BI2L1_HUMAN]	3.4765	4.89	1	2	2	2	30248.1	1.04254	1		511	56.8471	8.67529
P0C0L4	Complement C4-A OS=Homo sapiens GN=C4A PE=1 SV=2 - [CO4A_HUMAN]	3.30465	0.86	2	1	1	1	154004				1744	192.664	7.07861
P67809	Nuclease-sensitive element-binding protein 1 OS=Homo sapiens GN=YBX1 PE=1 SV=3 - [YBOX1_HUMAN]	3.03055	5.25	3	1	1	1	149277				324	35.9027	9.87646
P62701	40S ribosomal protein S4, X isoform OS=Homo sapiens GN=RPS4X PE=1 SV=2 - [RS4X_HUMAN]	2.81762	3.42	1	1	1	1	275554	1.32379	1		263	29.5791	10.1548
P46776	60S ribosomal protein L27a OS=Homo sapiens GN=RPL27A PE=1 SV=2 - [RL27A_HUMAN]	2.79079	7.43	1	1	1	1	527463	1.08209	1		148	16.551	11.0044
P60981	Destrin OS=Homo sapiens GN=DSTN PE=1 SV=3 - [DEST_HUMAN]	2.72962	6.67	1	1	1	1	224966	1.23147	1		165	18.4935	7.85498
P62273	40S ribosomal protein S29 OS=Homo sapiens GN=RPS29 PE=1 SV=2 - [RS29_HUMAN]	2.71697	14.29	1	1	1	1	236887	0.975453	1		56	6.6723	10.1255
P61604	10 kDa heat shock protein, mitochondrial OS=Homo sapiens GN=HSPE1 PE=1 SV=2 - [CH10_HUMAN]	2.63419	13.73	1	1	1	1	72189.2	1.43294	1		102	10.9249	8.92432
P31942	Heterogeneous nuclear ribonucleoprotein H3 OS=Homo sapiens GN=HNRNPH3 PE=1 SV=2 - [HNRH3_HUMAN]	2.62985	6.07	1	1	1	1	303871	0.581925	1		346	36.9031	6.87354
Q13151	Heterogeneous nuclear ribonucleoprotein A0 OS=Homo sapiens GN=HNRNPA0 PE=1 SV=1 - [ROA0_HUMAN]	2.56561	4.92	1	1	1	2	407498				305	30.8218	9.29053
P60660	Myosin light polypeptide 6 OS=Homo sapiens GN=MYL6 PE=1 SV=2 - [MYL6_HUMAN]	2.5386	8.61	2	1	1	1	84490.1	0.719134	1		151	16.9191	4.65283
P02452	Collagen alpha-1(I) chain OS=Homo sapiens GN=COL1A1 PE=1 SV=5 - [CO1A1_HUMAN]	2.53607	0.61	1	1	1	1	5438.76				1464	138.857	5.79541
P63220	40S ribosomal protein S21 OS=Homo sapiens GN=RPS21 PE=1 SV=1 - [RS21_HUMAN]	2.47712	12.05	1	1	1	1	82065.7	1.28645	1		83	9.10557	8.49951
P50991	T-complex protein 1 subunit delta OS=Homo sapiens GN=CCT4 PE=1 SV=4 - [TCPD_HUMAN]	2.47435	2.41	1	1	1	1	276892	0.905382	1		539	57.8878	7.82568
P62277	40S ribosomal protein S13 OS=Homo sapiens GN=RPS13 PE=1 SV=2 - [RS13_HUMAN]	2.4047	6.62	1	1	1	1	110599	1.10812	1		151	17.2117	10.5356
P11182	Lipoamide acyltransferase component of branched-chain alpha-keto acid dehydrogenase complex, mitochondrial OS=Homo sapiens GN=DBT PE=1 SV=3 - [ODB2_HUMAN]	2.36936	1.87	1	1	1	1	104655	0.774443	1		482	53.4529	8.51416
P46778	60S ribosomal protein L21 OS=Homo sapiens GN=RPL21 PE=1 SV=2 - [RL21_HUMAN]	2.36867	9.38	1	1	1	1	386155	1.04691	1		160	18.5531	10.4917
P42677	40S ribosomal protein S27 OS=Homo sapiens GN=RPS27 PE=1 SV=3 - [RS27_HUMAN]	2.36408	14.29	1	1	1	1	58666.9	0.87187	1		84	9.45484	9.45166
P07737	Profilin-1 OS=Homo sapiens GN=PFN1 PE=1 SV=2 - [PROF1_HUMAN]	2.34695	10	1	1	1	1	222097	0.937825	1		140	15.0446	8.26514
P52209	6-phosphogluconate dehydrogenase, decarboxylating OS=Homo sapiens GN=PGD PE=1 SV=3 - [6PGD_HUMAN]	2.33541	3.52	1	1	1	1	93494	1.43952	1		483	53.106	7.2251
O60506	Heterogeneous nuclear ribonucleoprotein Q OS=Homo sapiens GN=SYNCRIP PE=1 SV=2 - [HNRPQ_HUMAN]	2.30922	1.93	2	1	1	1	89070				623	69.5596	8.5874
Q00839	Heterogeneous nuclear ribonucleoprotein U OS=Homo sapiens GN=HNRNPU PE=1 SV=6 - [HNRPU_HUMAN]	2.30754	4.12	1	2	2	2	174530				825	90.528	5.99854
Q02878	60S ribosomal protein L6 OS=Homo sapiens GN=RPL6 PE=1 SV=3 - [RL6_HUMAN]	2.28149	3.13	1	1	1	1	269182	1.09071	1		288	32.7076	10.5796
P60866	40S ribosomal protein S20 OS=Homo sapiens GN=RPS20 PE=1 SV=1 - [RS20_HUMAN]	2.26226	10.08	1	1	1	1	592380	0.920984	1		119	13.3643	9.93506
P32322	Pyrroline-5-carboxylate reductase 1, mitochondrial OS=Homo sapiens GN=PYCR1 PE=1 SV=2 - [P5CR1_HUMAN]	2.26223	3.45	1	1	1	1	68649	1.04066	1		319	33.3396	7.60596
O60437	Periplakin OS=Homo sapiens GN=PPL PE=1 SV=4 - [PEPL_HUMAN]	2.25372	0.8	1	1	1	1	764588				1756	204.623	5.60498
P42704	Leucine-rich PPR motif-containing protein, mitochondrial OS=Homo sapiens GN=LRPPRC PE=1 SV=3 - [LPPRC_HUMAN]	2.22363	0.65	1	1	1	1	68985.8				1394	157.805	6.12549
Q01844	RNA-binding protein EWS OS=Homo sapiens GN=EWSR1 PE=1 SV=1 - [EWS_HUMAN]	2.22345	2.13	1	1	1	1	85339.8				656	68.4357	9.33447
P35232	Prohibitin OS=Homo sapiens GN=PHB PE=1 SV=1 - [PHB_HUMAN]	2.21049	3.68	1	1	1	1	37305.1	2.7928	1		272	29.7859	5.75732
Q05519	Serine/arginine-rich splicing factor 11 OS=Homo sapiens GN=SRSF11 PE=1 SV=1 - [SRS11_HUMAN]	2.19729	2.89	1	1	1	1	153950	0.347375	1		484	53.5102	10.521
Q9Y2Q3	Glutathione S-transferase kappa 1 OS=Homo sapiens GN=GSTK1 PE=1 SV=3 - [GSTK1_HUMAN]	2.18808	6.19	1	1	1	2	66385.8	1.35725	1		226	25.4803	8.41162
P54886	Delta-1-pyrroline-5-carboxylate synthase OS=Homo sapiens GN=ALDH18A1 PE=1 SV=2 - [P5CS_HUMAN]	2.16938	1.13	1	1	1	1	10042.6				795	87.2475	7.12256
P62906	60S ribosomal protein L10a OS=Homo sapiens GN=RPL10A PE=1 SV=2 - [RL10A_HUMAN]	2.14486	3.69	1	1	1	1	135866	1.43572	1		217	24.8155	9.93506
Q86X19	Transmembrane protein 17 OS=Homo sapiens GN=TMEM17 PE=2 SV=2 - [TMM17_HUMAN]	2.10654	4.04	1	1	1	1	382567				198	23.0312	6.78564
Q13247	Serine/arginine-rich splicing factor 6 OS=Homo sapiens GN=SRSF6 PE=1 SV=2 - [SRSF6_HUMAN]	2.09123	2.62	1	1	1	1	228572	0.43528	1		344	39.5634	11.4292
Q92499	ATP-dependent RNA helicase DDX1 OS=Homo sapiens GN=DDX1 PE=1 SV=2 - [DDX1_HUMAN]	2.06748	1.49	1	1	1	1	72146.6				740	82.3798	7.2251
P31327	Carbamoyl-phosphate synthase [ammonia], mitochondrial OS=Homo sapiens GN=CPS1 PE=1 SV=2 - [CPSM_HUMAN]	2.06161	0.8	1	1	1	1	71316.5	1.16188	1		1500	164.835	6.7417
P24534	Elongation factor 1-beta OS=Homo sapiens GN=EEF1B2 PE=1 SV=3 - [EF1B_HUMAN]	2.02813	5.78	1	1	1	1	142598	1.04168	1		225	24.7483	4.66553
O95071	E3 ubiquitin-protein ligase UBR5 OS=Homo sapiens GN=UBR5 PE=1 SV=2 - [UBR5_HUMAN]	2	0.29	1	1	1	1	38131				2799	309.158	5.84619
P55327	Tumor protein D52 OS=Homo sapiens GN=TPD52 PE=1 SV=2 - [TPD52_HUMAN]	1.99864	6.25	1	1	1	1	70700.2	0.986574	1		224	24.3122	4.83057
P00338	L-lactate dehydrogenase A chain OS=Homo sapiens GN=LDHA PE=1 SV=2 - [LDHA_HUMAN]	1.98172	3.31	1	1	1	1	92896.6	1.11526	1		332	36.6654	8.26514
P02747	Complement C1q subcomponent subunit C OS=Homo sapiens GN=C1QC PE=1 SV=3 - [C1QC_HUMAN]	1.9274	7.35	1	1	1	1	182809				245	25.7571	8.41162
P62753	40S ribosomal protein S6 OS=Homo sapiens GN=RPS6 PE=1 SV=1 - [RS6_HUMAN]	1.92317	6.02	1	1	1	1	37881	1.657	1		249	28.663	10.8433
Q8TER0	Sushi, nidogen and EGF-like domain-containing protein 1 OS=Homo sapiens GN=SNED1 PE=2 SV=2 - [SNED1_HUMAN]	1.88807	0.57	1	1	1	1	339184				1413	152.104	6.97607
Q8IUD2	ELKS/Rab6-interacting/CAST family member 1 OS=Homo sapiens GN=ERC1 PE=1 SV=1 - [RB6I2_HUMAN]	1.88696	1.16	1	1	1	1	27527.9				1116	128.008	5.97314
P78347	General transcription factor II-I OS=Homo sapiens GN=GTF2I PE=1 SV=2 - [GTF2I_HUMAN]	1.88119	0.8	1	1	1	1	84823.2	0.991018	1		998	112.346	6.39209
O60610	Protein diaphanous homolog 1 OS=Homo sapiens GN=DIAPH1 PE=1 SV=2 - [DIAP1_HUMAN]	1.87534	0.86	1	1	1	1	64954.9				1272	141.258	5.41455
P46779	60S ribosomal protein L28 OS=Homo sapiens GN=RPL28 PE=1 SV=3 - [RL28_HUMAN]	1.86751	8.03	1	1	1	1	263493	0.767275	1		137	15.7377	12.0151
Q08380	Galectin-3-binding protein OS=Homo sapiens GN=LGALS3BP PE=1 SV=1 - [LG3BP_HUMAN]	1.85058	2.22	1	1	1	1	53199.4				585	65.2893	5.2749
O43150	Arf-GAP with SH3 domain, ANK repeat and PH domain-containing protein 2 OS=Homo sapiens GN=ASAP2 PE=1 SV=3 - [ASAP2_HUMAN]	1.84324	0.8	1	1	1	1	81486.1	0.911584	1		1006	111.581	6.68311
P51659	Peroxisomal multifunctional enzyme type 2 OS=Homo sapiens GN=HSD17B4 PE=1 SV=3 - [DHB4_HUMAN]	1.82456	2.17	1	1	1	1	47778	1.40015	1		736	79.6363	8.83643
Q96RQ3	Methylcrotonoyl-CoA carboxylase subunit alpha, mitochondrial OS=Homo sapiens GN=MCCC1 PE=1 SV=3 - [MCCA_HUMAN]	1.78886	1.52	1	1	1	1	115156	0.911807	1		725	80.4219	7.78174
P78371	T-complex protein 1 subunit beta OS=Homo sapiens GN=CCT2 PE=1 SV=4 - [TCPB_HUMAN]	1.76424	1.5	1	1	1	1	49949.8	0.807548	1		535	57.4521	6.45557
P31948	Stress-induced-phosphoprotein 1 OS=Homo sapiens GN=STIP1 PE=1 SV=1 - [STIP1_HUMAN]	1.74861	2.39	1	1	1	1	61223	0.814537	1		543	62.5994	6.80029
P09651	Heterogeneous nuclear ribonucleoprotein A1 OS=Homo sapiens GN=HNRNPA1 PE=1 SV=5 - [ROA1_HUMAN]	1.6982	4.84	1	1	1	1	71528.6	0.418348	1		372	38.7231	9.12939
P13489	Ribonuclease inhibitor OS=Homo sapiens GN=RNH1 PE=1 SV=2 - [RINI_HUMAN]	1.61277	3.25	1	1	1	1	20089.8				461	49.9411	4.81787
Q92526	T-complex protein 1 subunit zeta-2 OS=Homo sapiens GN=CCT6B PE=1 SV=5 - [TCPW_HUMAN]	1.60191	1.32	2	1	1	1	43237.4				530	57.7846	7.23975
O95232	Luc7-like protein 3 OS=Homo sapiens GN=LUC7L3 PE=1 SV=2 - [LC7L3_HUMAN]	0	3.24	1	1	1	1	29901.6				432	51.4351	9.78857
Q99729	Heterogeneous nuclear ribonucleoprotein A/B OS=Homo sapiens GN=HNRNPAB PE=1 SV=2 - [ROAA_HUMAN]	0	3.92	1	1	1	1	34574.5				332	36.2024	8.20654
Q96SI9	Spermatid perinuclear RNA-binding protein OS=Homo sapiens GN=STRBP PE=1 SV=1 - [STRBP_HUMAN]	0	1.04	1	1	1	1	134567	0.991748	1		672	73.6059	8.71924
